# Supplementary material for: Electrophilic ring fluorination of 3,5-disubstituted pyrazoles: application to the formal synthesis of a neprilysin inhibitor key intermediate
Source: Royal Society of Chemistry journal article supplement (doi:10.1039/d0nj05222a), 2020-01-01

## SUPPORTING INFORMATION

### Electrophilic ring fluorination of 3,5-disubstituted pyrazoles: application to the formal synthesis of neprilysin inhibitor key intermediate

Anne Westermeyer,<sup>a,b</sup> Gérard Guillaumot,<sup>b</sup> Phannarath Phansavath,<sup>a\*</sup> Virginie  
Ratovelomanana-Vidal<sup>a\*</sup>

<sup>a</sup> PSL University, Chimie ParisTech-CNRS, Institute of Chemistry for Life & Health Sciences, CSB2D  
Team, 11 rue Pierre et Marie Curie, 75005 Paris, France

<sup>b</sup> SEQENS, 2-8 rue de Rouen, ZI de Limay-Porcheville, 78440 Porcheville, France

\*E-mails of corresponding authors:

phannarath.phansavath@chimieparistech.psl.eu (Phannarath Phansavath)

virginie.vidal@chimie-paristech.fr (Virginie Ratovelomanana-Vidal)

### Table of Contents

|                                                                                 |    |
|---------------------------------------------------------------------------------|----|
| 1. General Information.....                                                     | 2  |
| a. Purification of solvents and reagents.....                                   | 2  |
| b. Chromatography.....                                                          | 2  |
| c. NMR analyses.....                                                            | 2  |
| d. Mass and IR analyses.....                                                    | 2  |
| 2. Preparation of 4-fluoropyrazoles – NMR spectra.....                          | 3  |
| 3. Selective deprotection of the SEM-group – NMR spectra.....                   | 43 |
| 4. Formal synthesis of neprilysin inhibitor key intermediate – NMR spectra..... | 47 |

## 1. General Information

### *a. Purification of solvents and reagents*

All reactions were performed under an atmosphere of argon. Reaction vessels were oven-dried, cooled under vacuum and flushed with argon before use. THF and CH<sub>2</sub>Cl<sub>2</sub> were dried over alumina columns in a solvent purification apparatus (Innovative Technologies PS-MD-5). Acetonitrile was distilled over CaH<sub>2</sub>, stored over 4 Å molecular sieves (MS) and used without further purification. Every reagent was either purified following the methods described in the literature or used without further purification.

### *b. Chromatography*

Reactions were monitored by thin layer chromatography (TLC) using commercial silica-gel plates (Merck 60 F254). Spots were detected with UV light (254 nm) and revealed with a KMnO<sub>4</sub> stain.<sup>1</sup> VWR Silica Gel 60 (40-63 μm) was employed for flash column chromatography.

### *c. NMR analyses*

Proton nuclear magnetic resonance (<sup>1</sup>H NMR) spectra were recorded using a Bruker AVANCE 300 (300 MHz) or a Bruker AVANCE 400 (400 MHz). Chemical shifts are reported in delta (δ) units part per million (ppm) relative to the residual protonated solvent (7.26 ppm for CDCl<sub>3</sub> and 2.05 ppm for acetone-*d*<sub>6</sub>). Coupling constants are reported in Hertz (Hz). The following abbreviations are used: s = singlet, d = doublet, t = triplet, q = quartet, m = multiplet, brs = broad singlet, brd = broad doublet. Carbon-13 nuclear magnetic resonance (<sup>13</sup>C NMR) spectra were recorded using a Bruker AVANCE 300 (75 MHz) or a Bruker AVANCE 400 (100 MHz). Chemical shifts are reported in delta (δ) units part per million (ppm) relative to the centre line of the triplet at 77.16 ppm for CDCl<sub>3</sub>, the septet at 106.29 ppm for acetone-*d*<sub>6</sub>. <sup>13</sup>C NMR experiments were routinely run with broadband decoupling. Fluorine nuclear magnetic resonance (<sup>19</sup>F{<sup>1</sup>H} NMR) spectra were recorded using a Bruker AVANCE 400 (376 MHz). Chemical shifts are reported in delta (δ) units part per million (ppm) and calibrated with CFCl<sub>3</sub> as external reference (0 ppm). NMR experiments were routinely run with broadband decoupling.

### *d. Mass and IR analyses*

Mass spectra were measured by electrospray ionization and were recorded at Sorbonne University (Paris). Infrared spectra were measured on a FT-4500 spectrometer at ENSCP Chimie ParisTech.

---

<sup>1</sup> KMnO<sub>4</sub> stain: purple solution prepared with 1.5 g of potassium permanganate, 10 g of potassium carbonate and 150 mg of potassium hydroxide in 200 mL of water.

## 2. Preparation of 4-fluoropyrazoles – NMR spectra

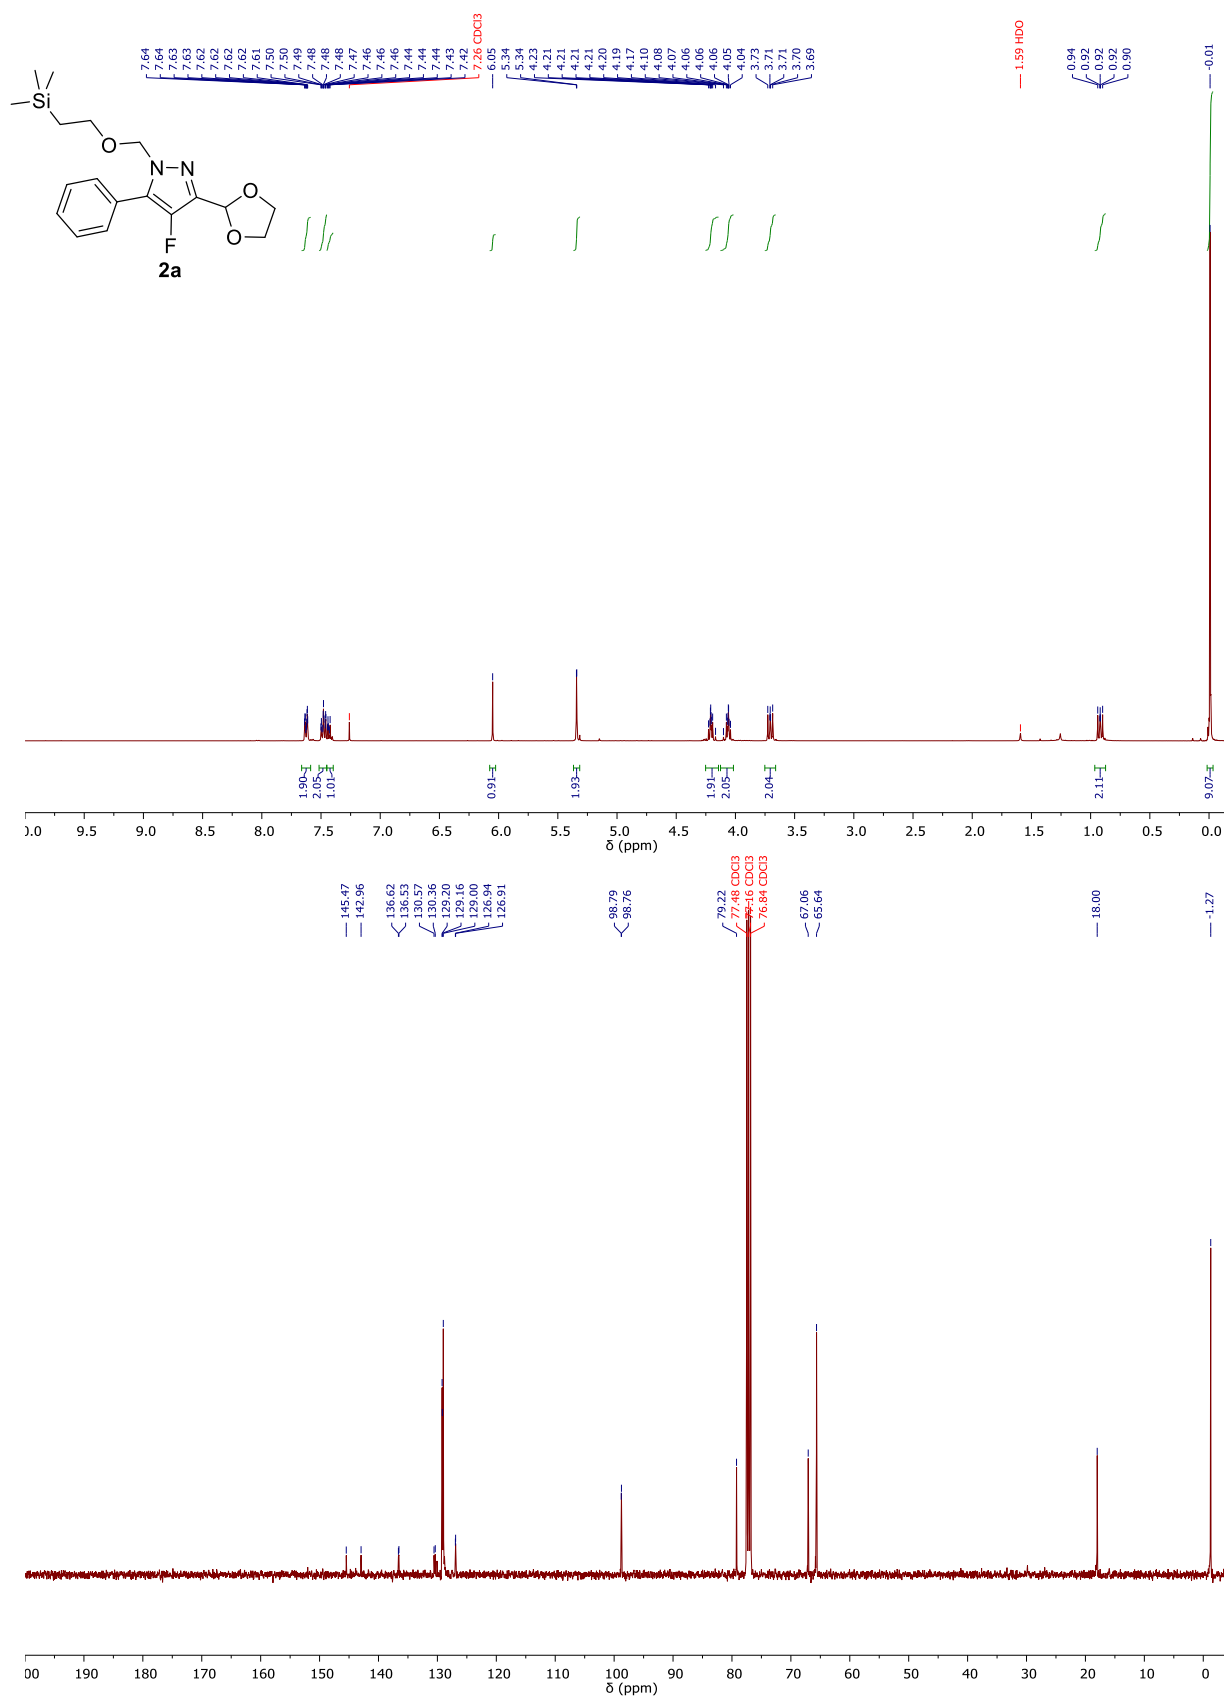

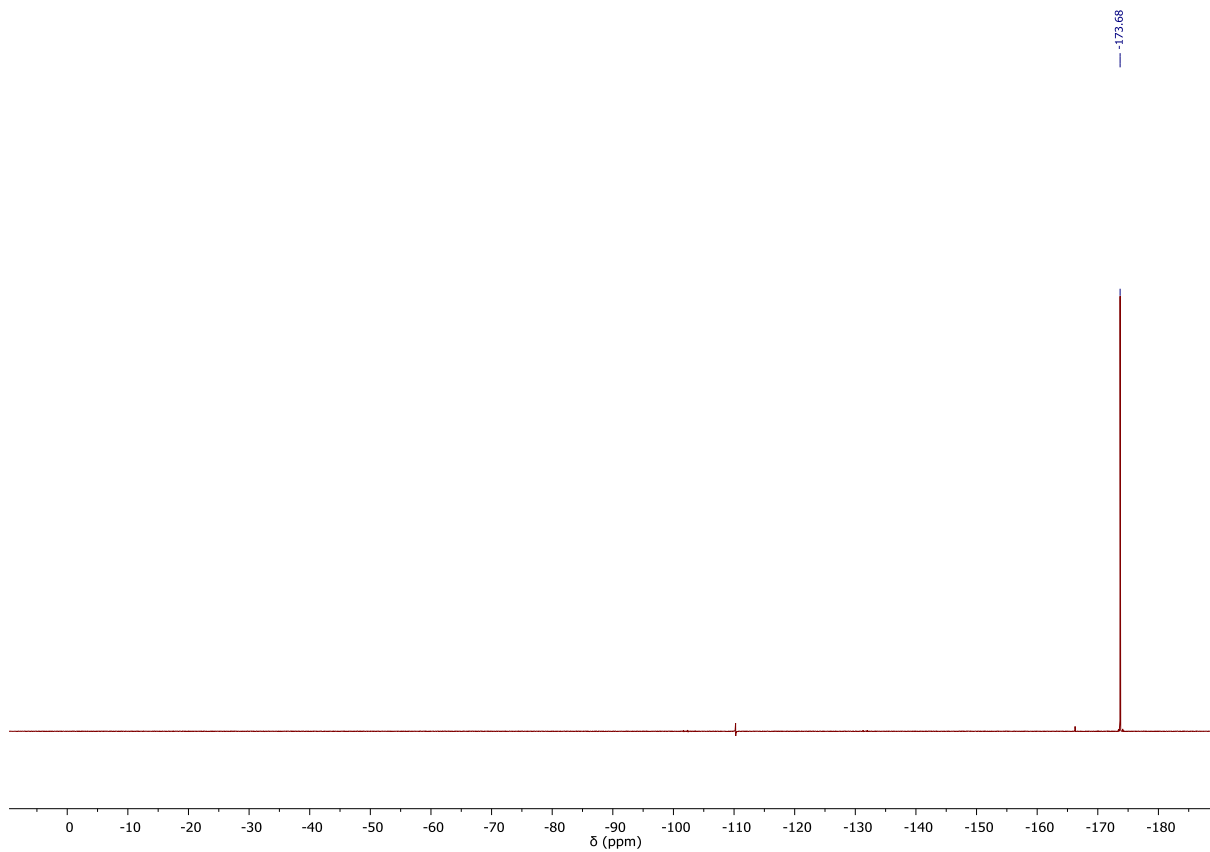

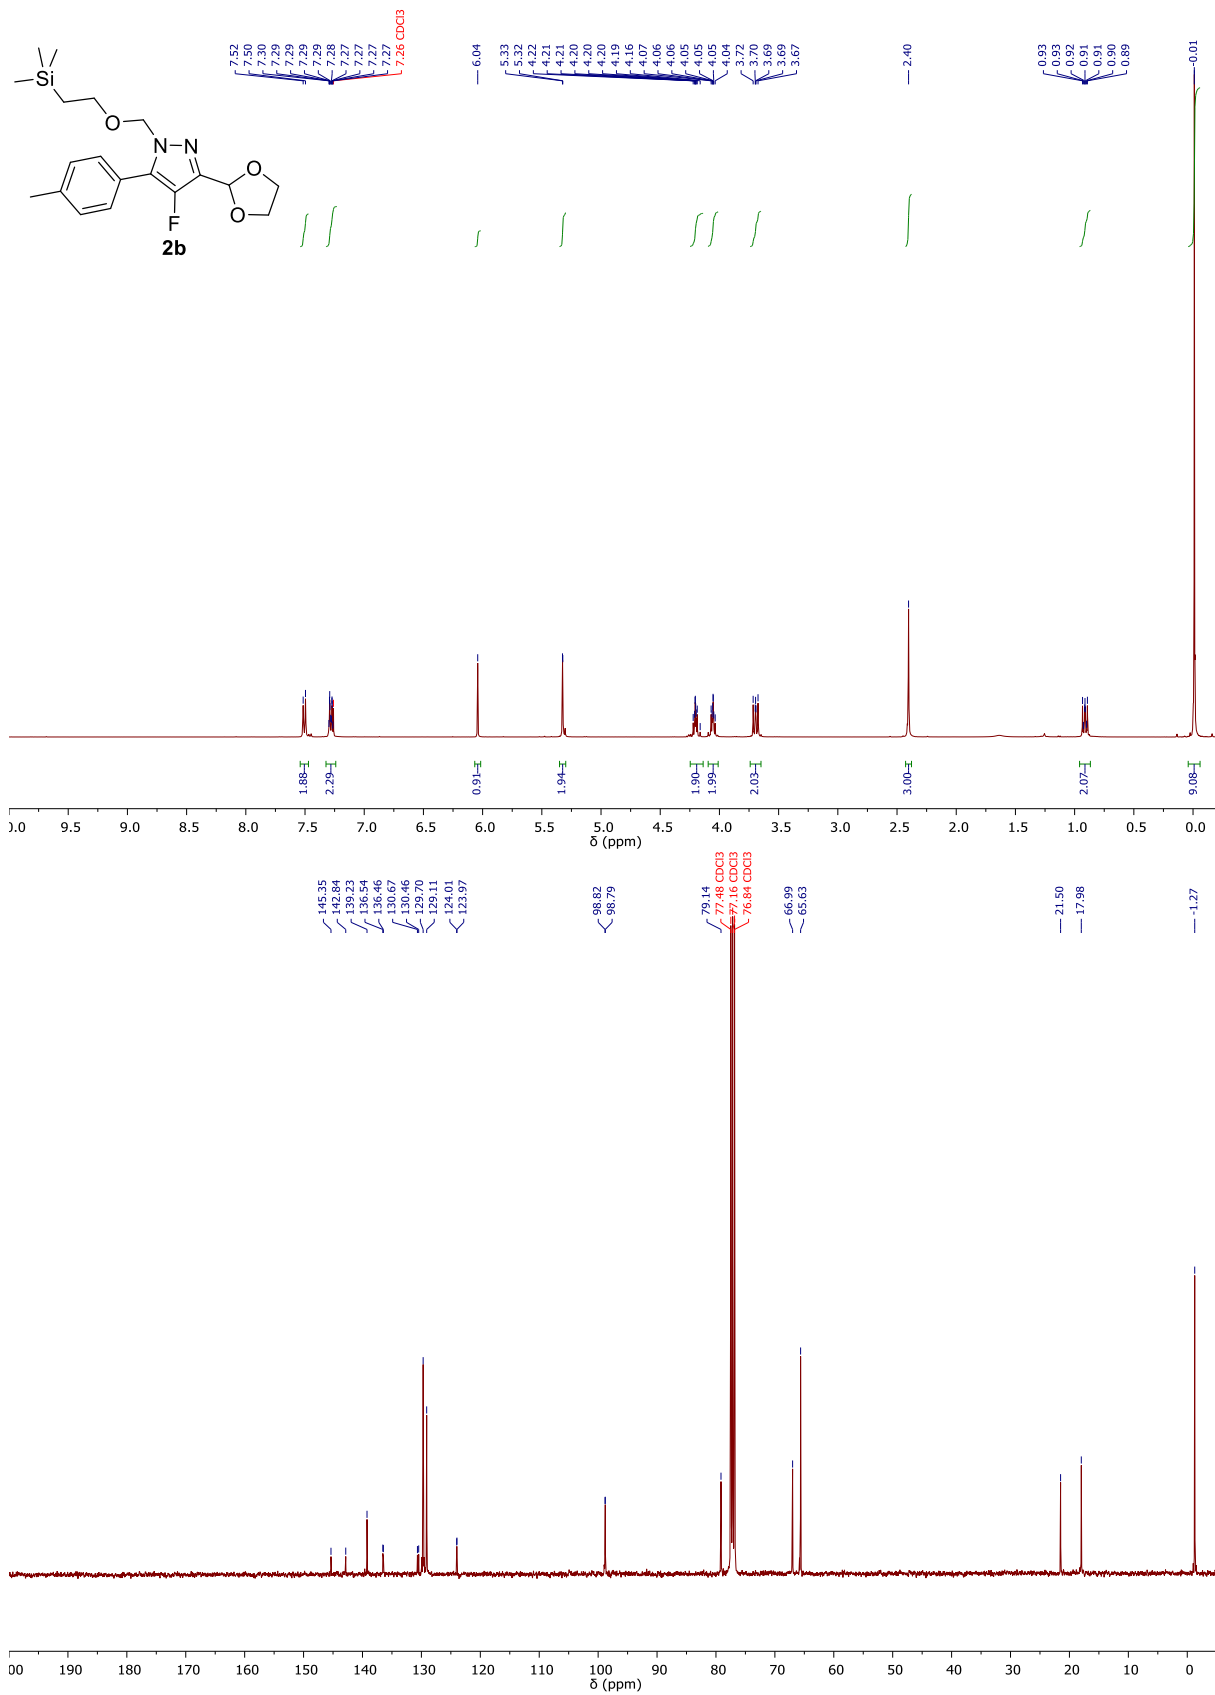

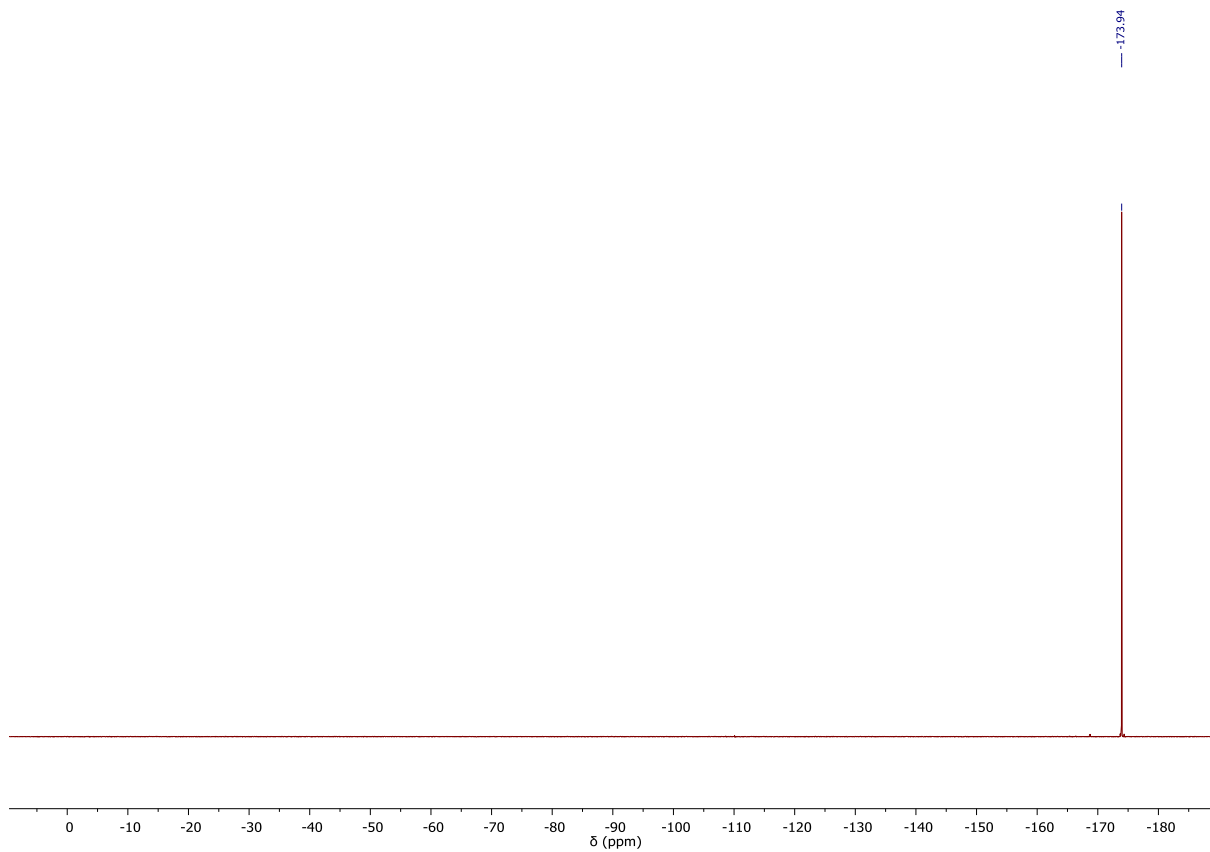

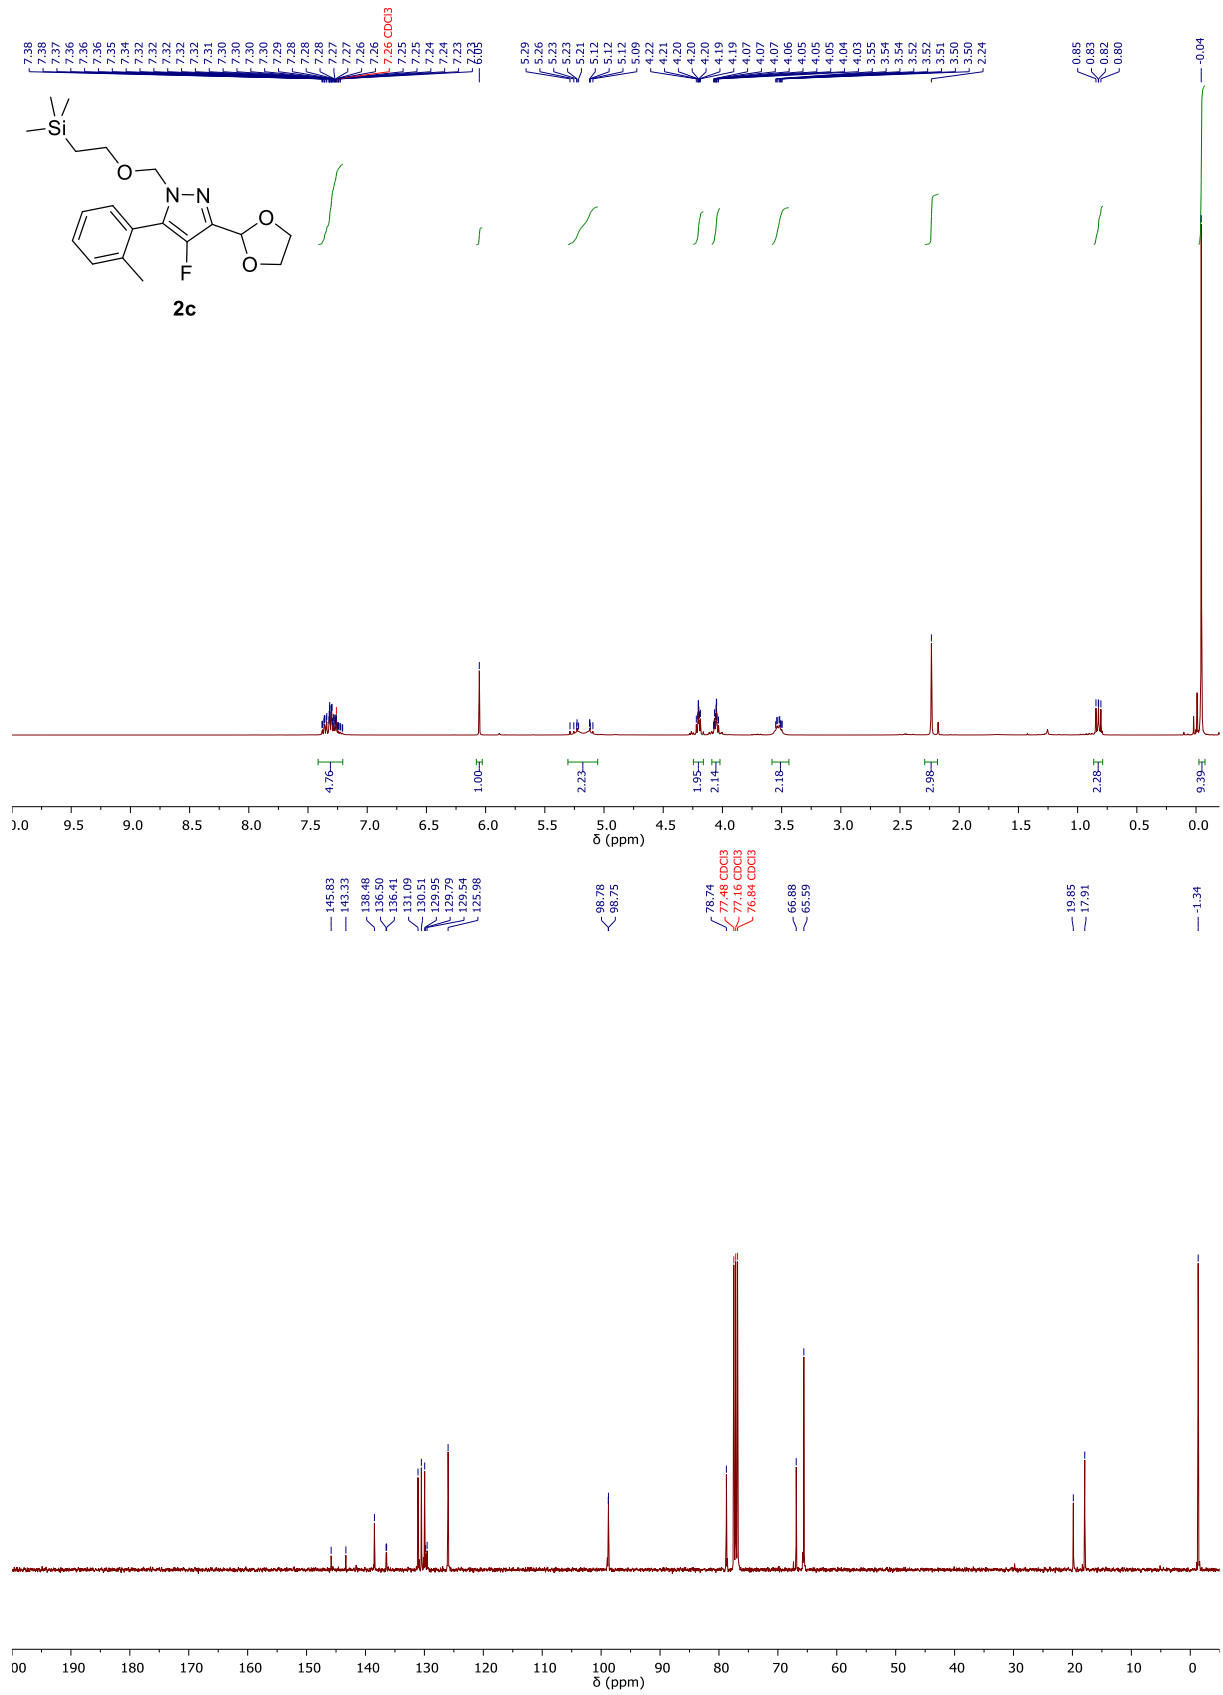

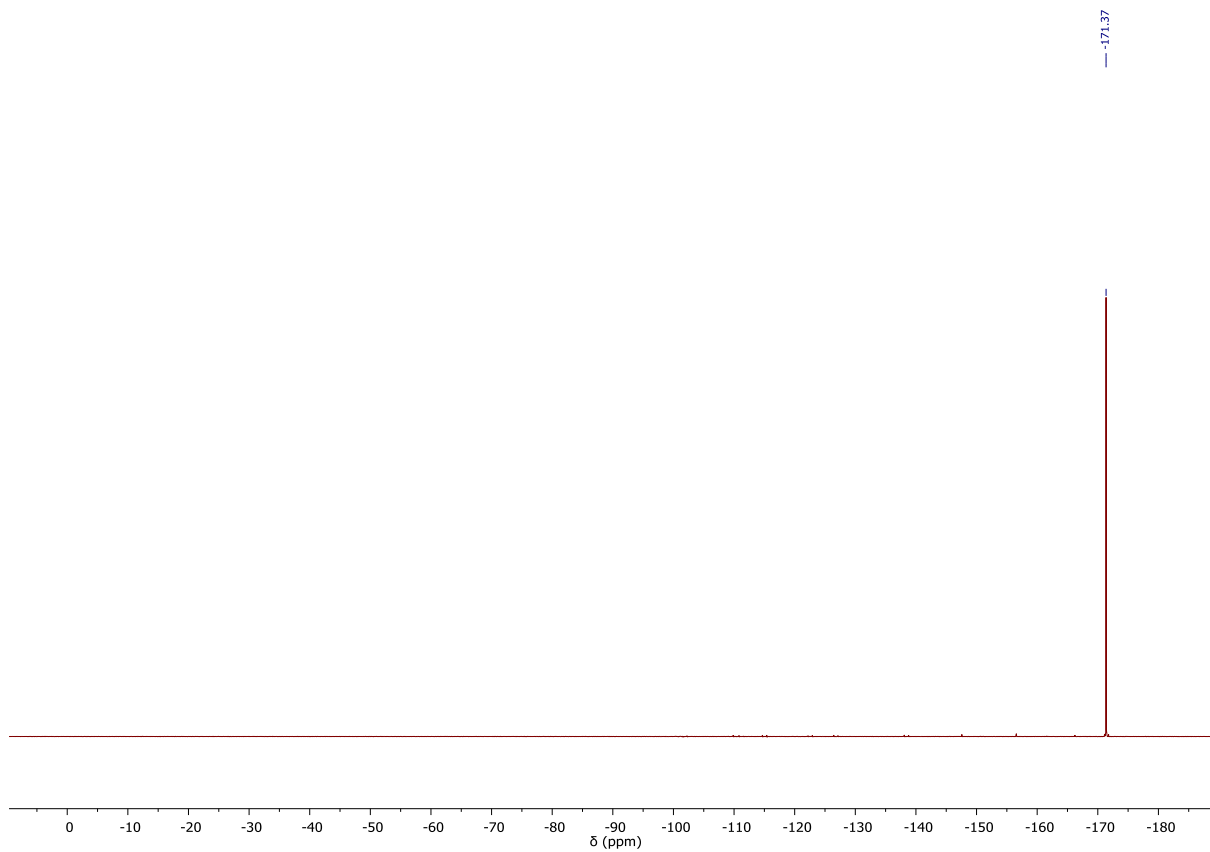



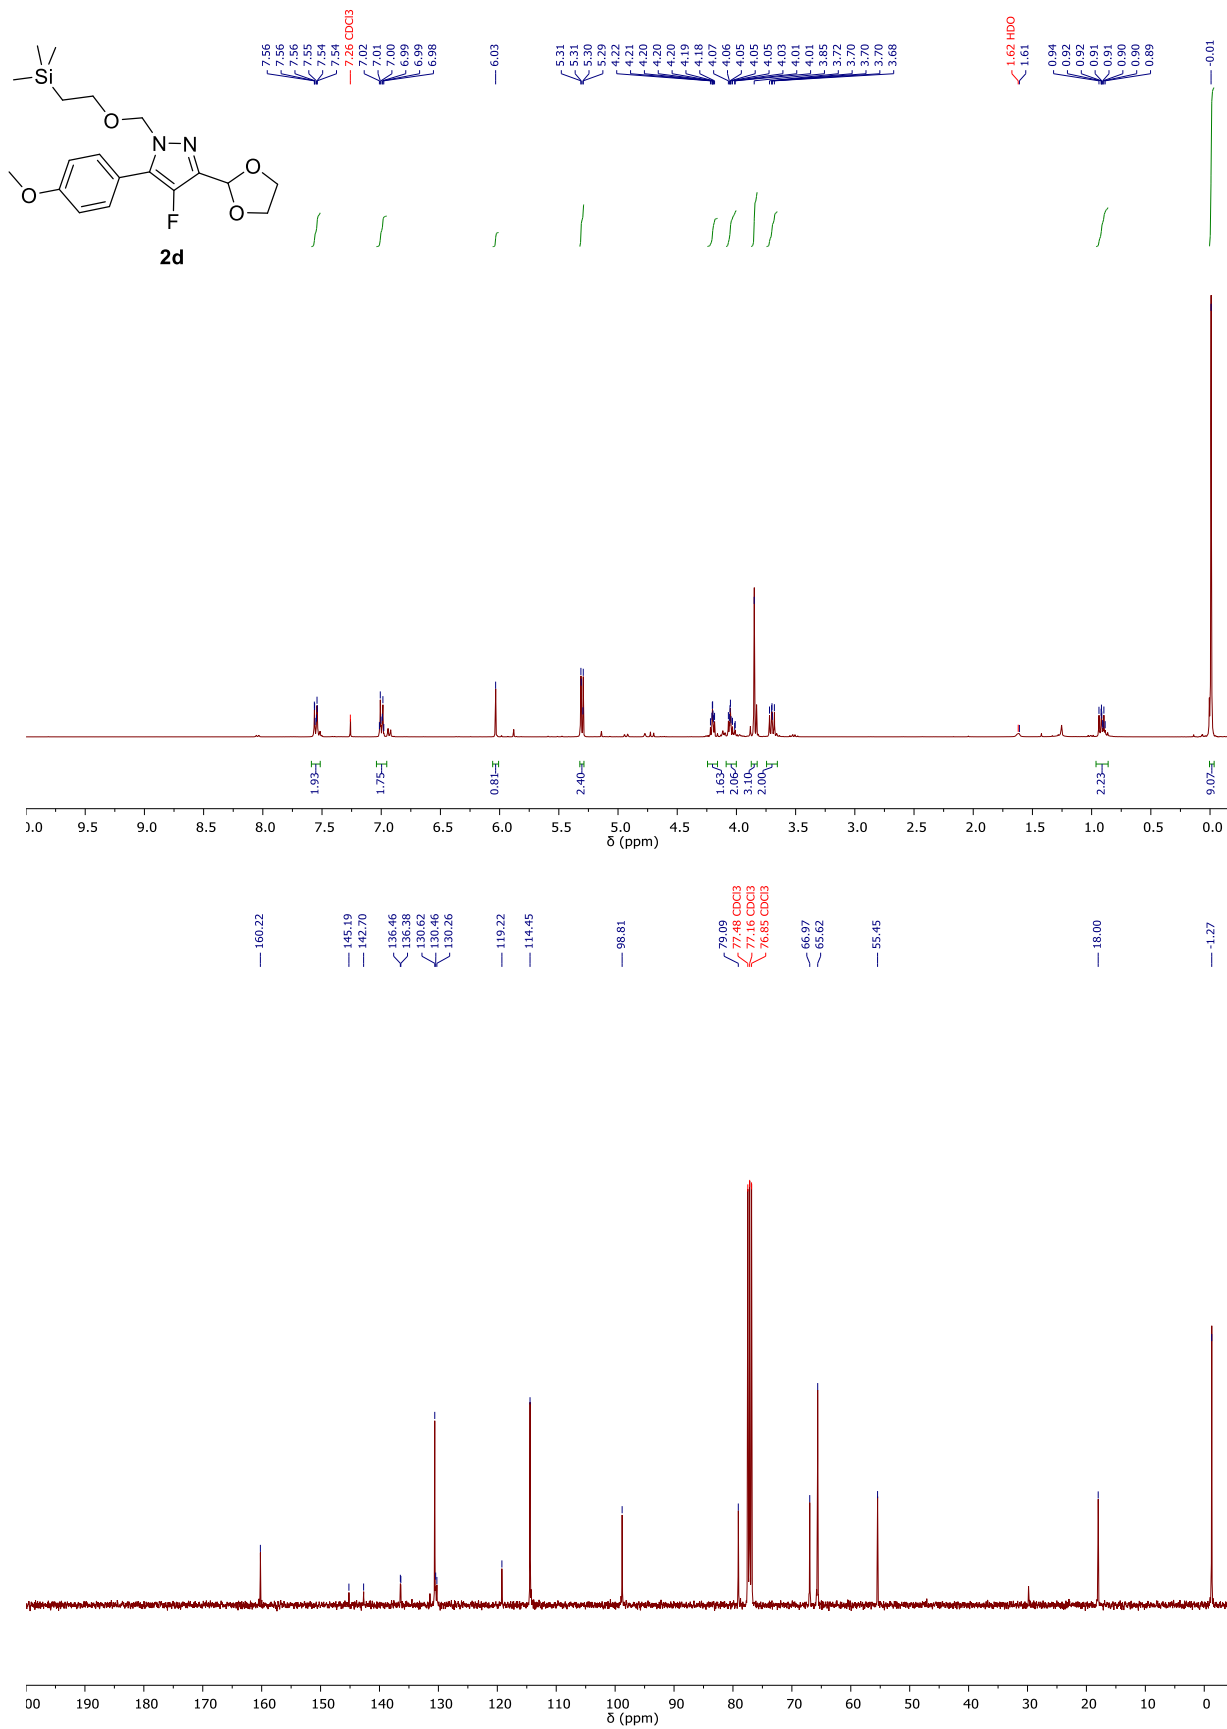

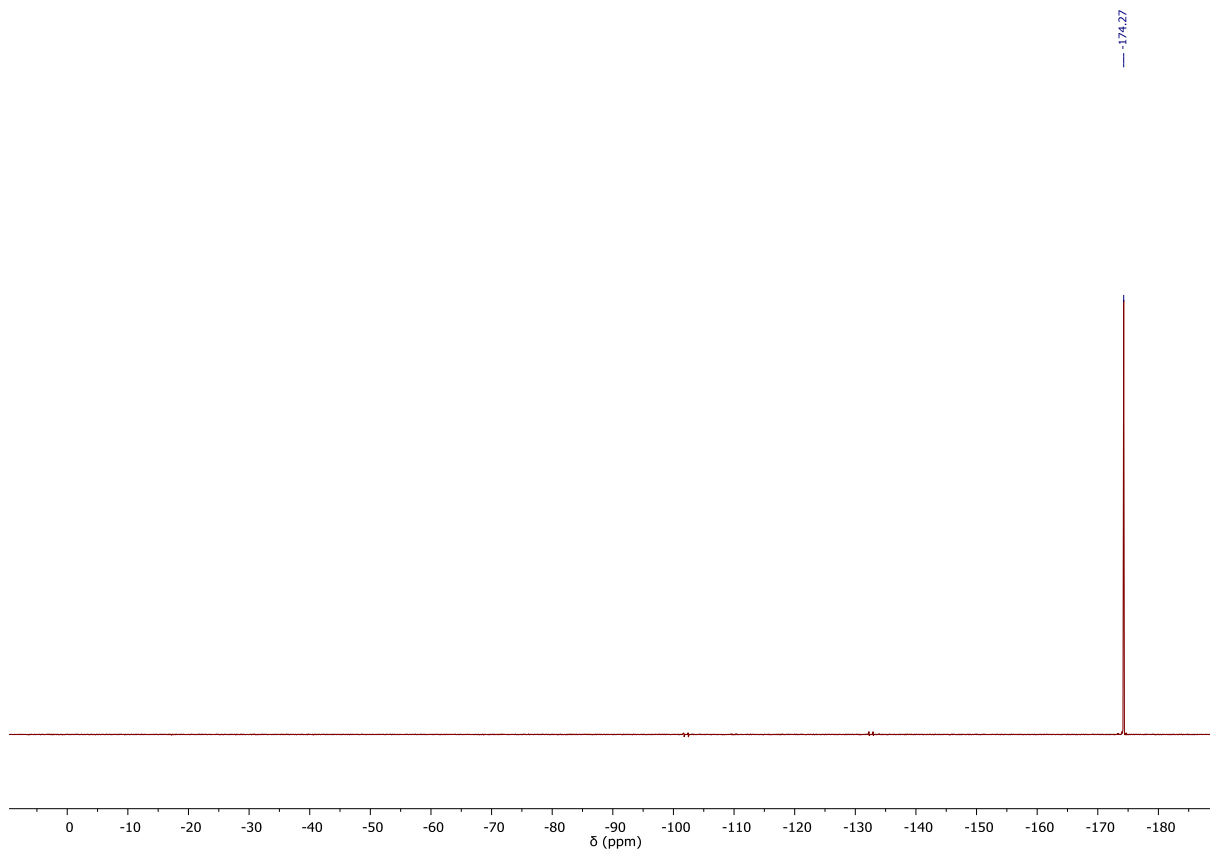

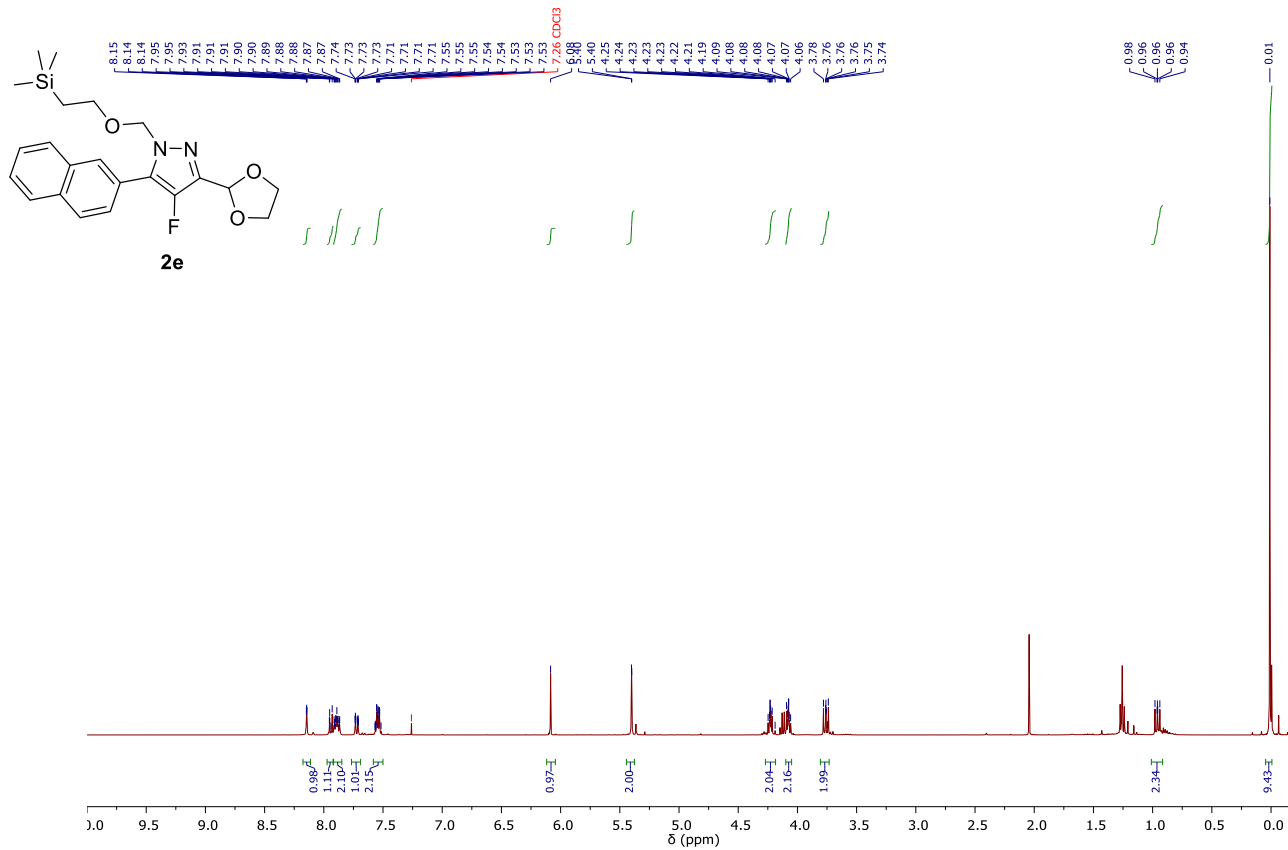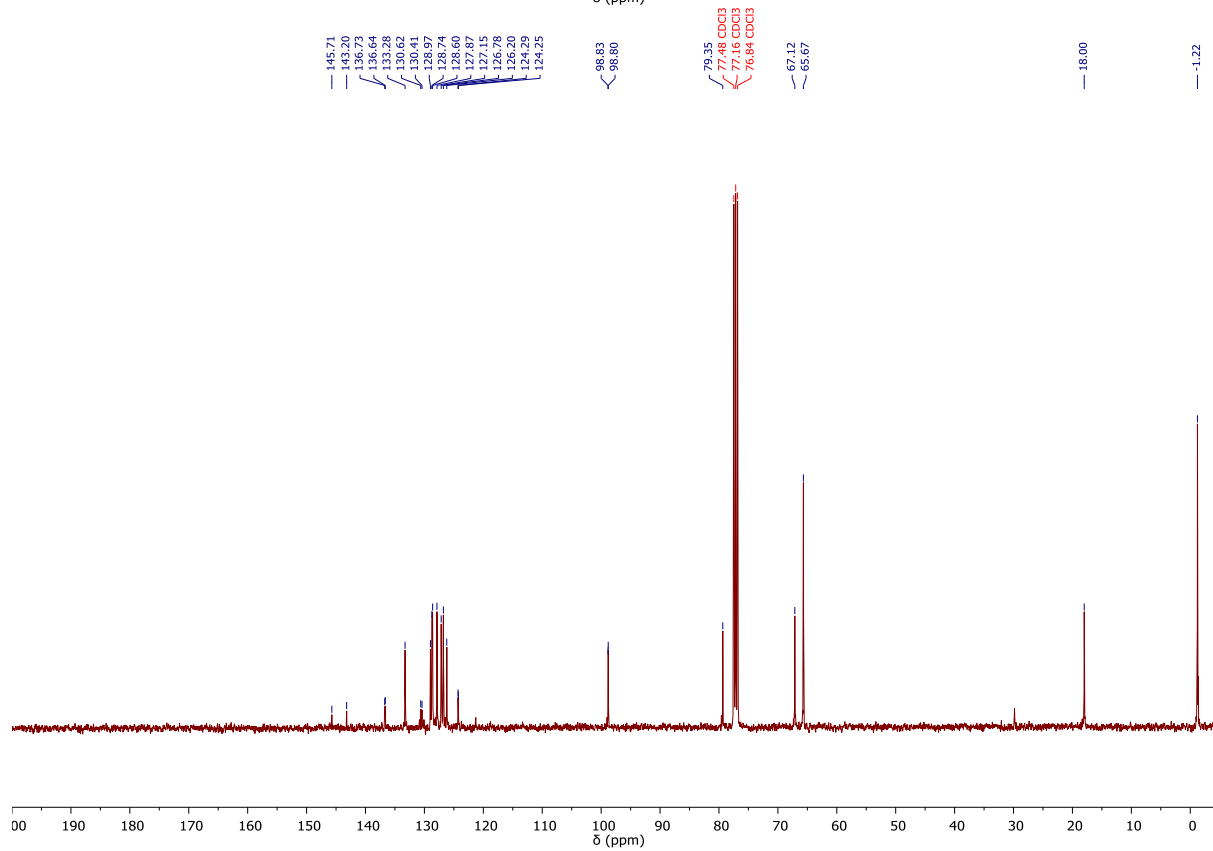

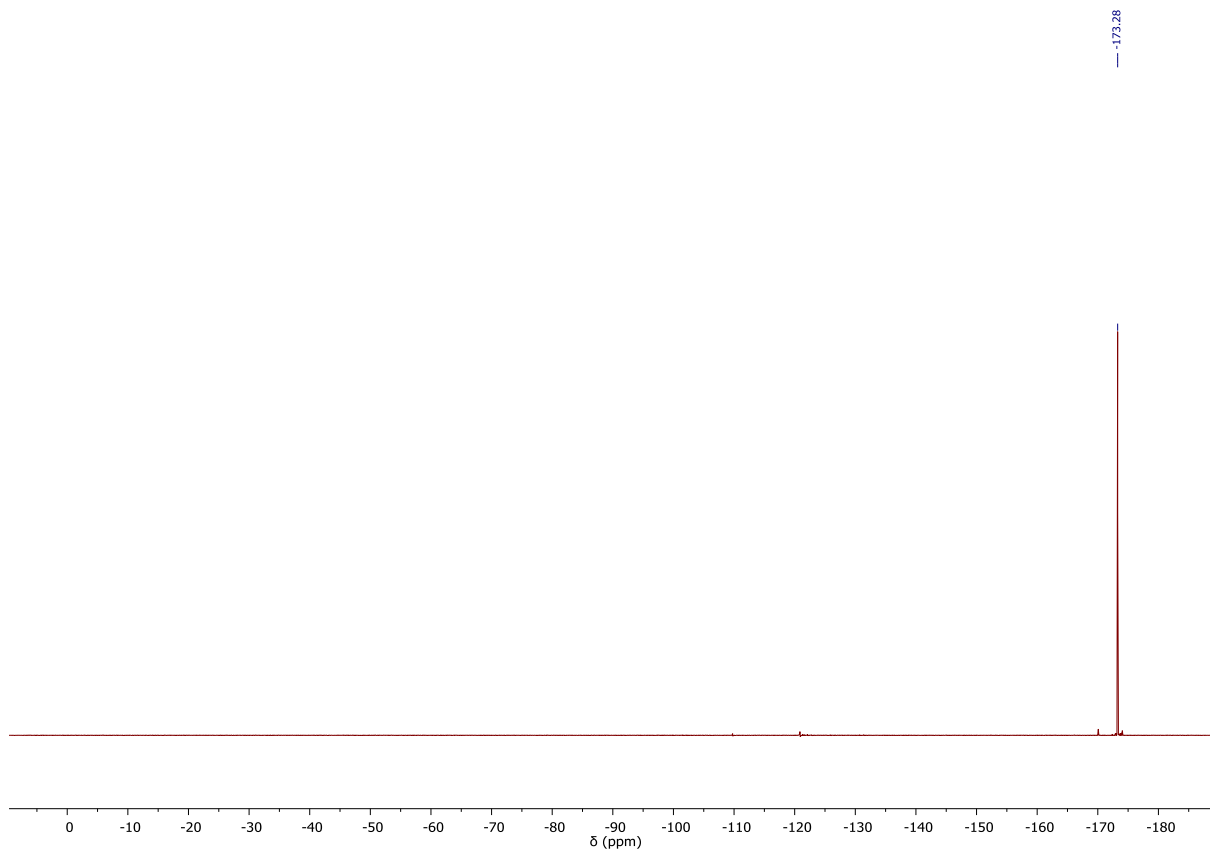

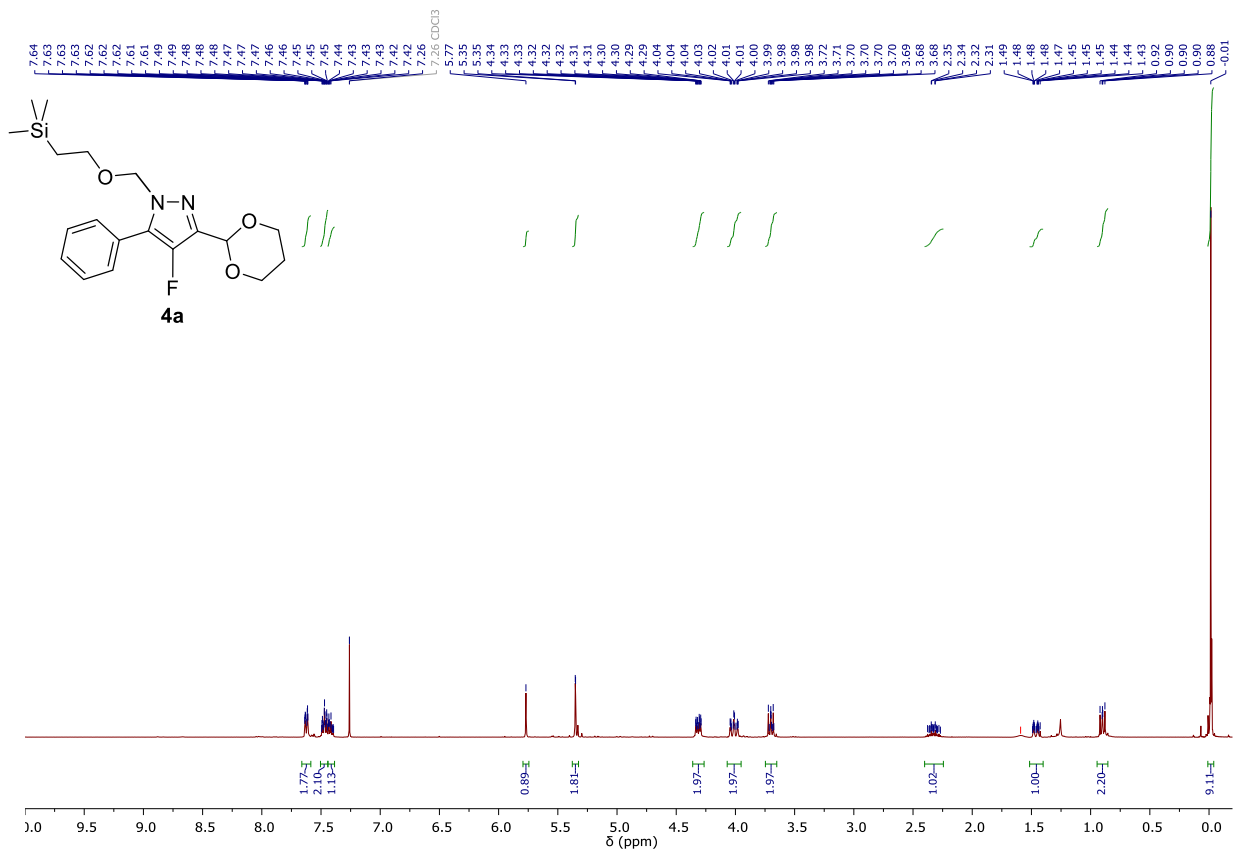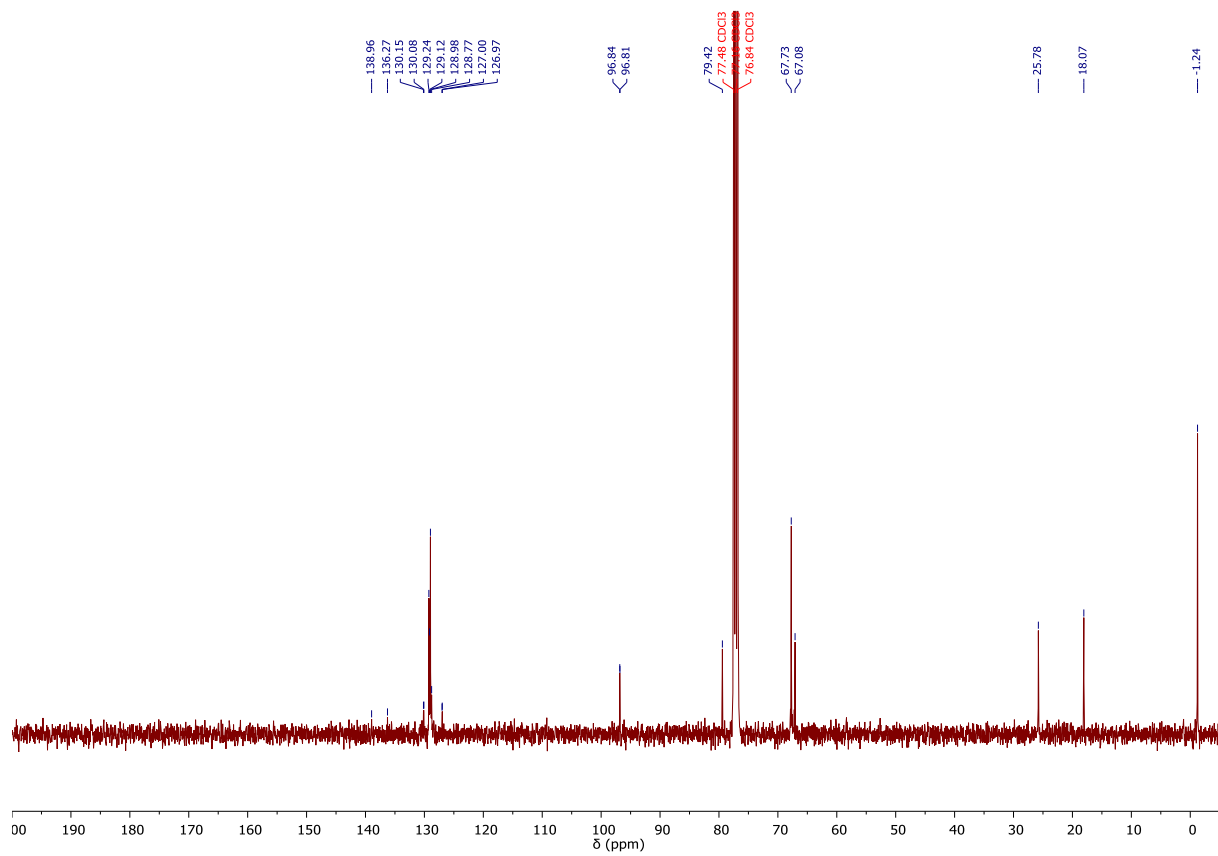

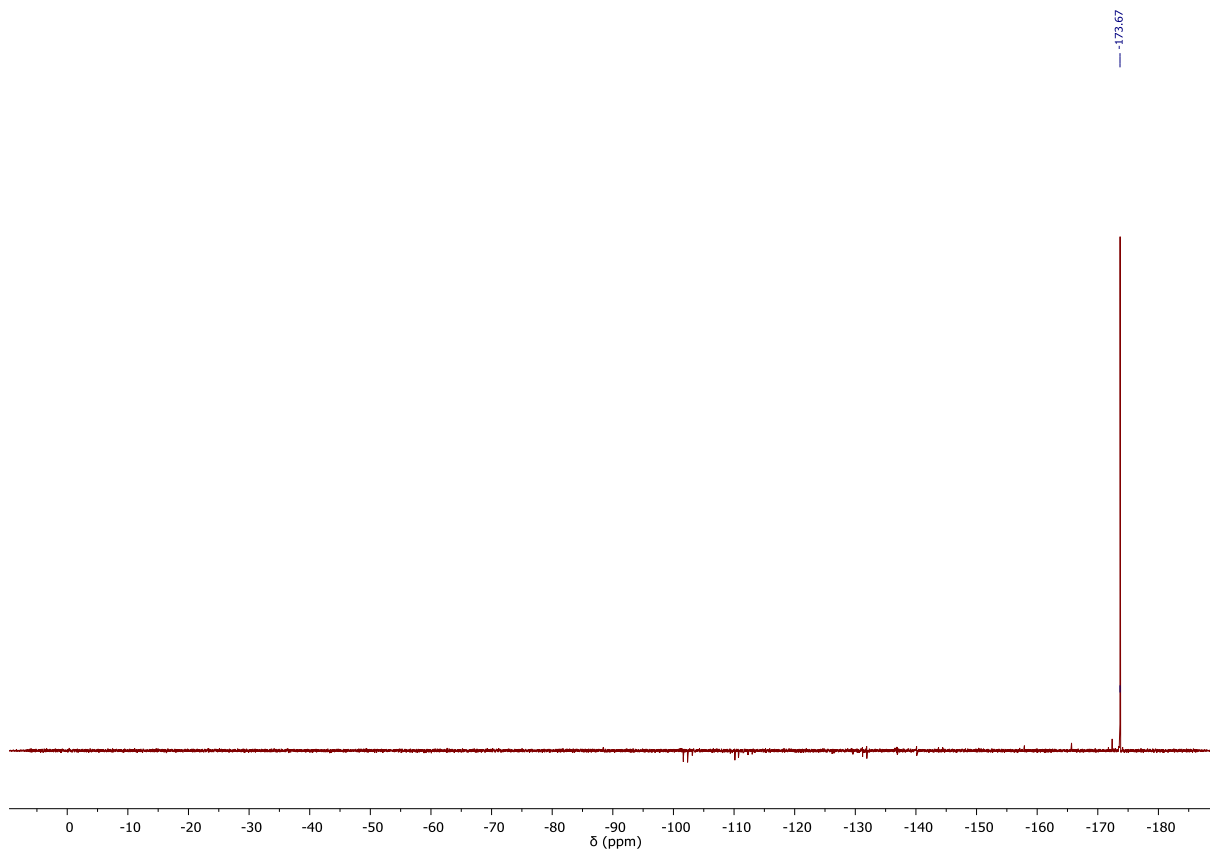

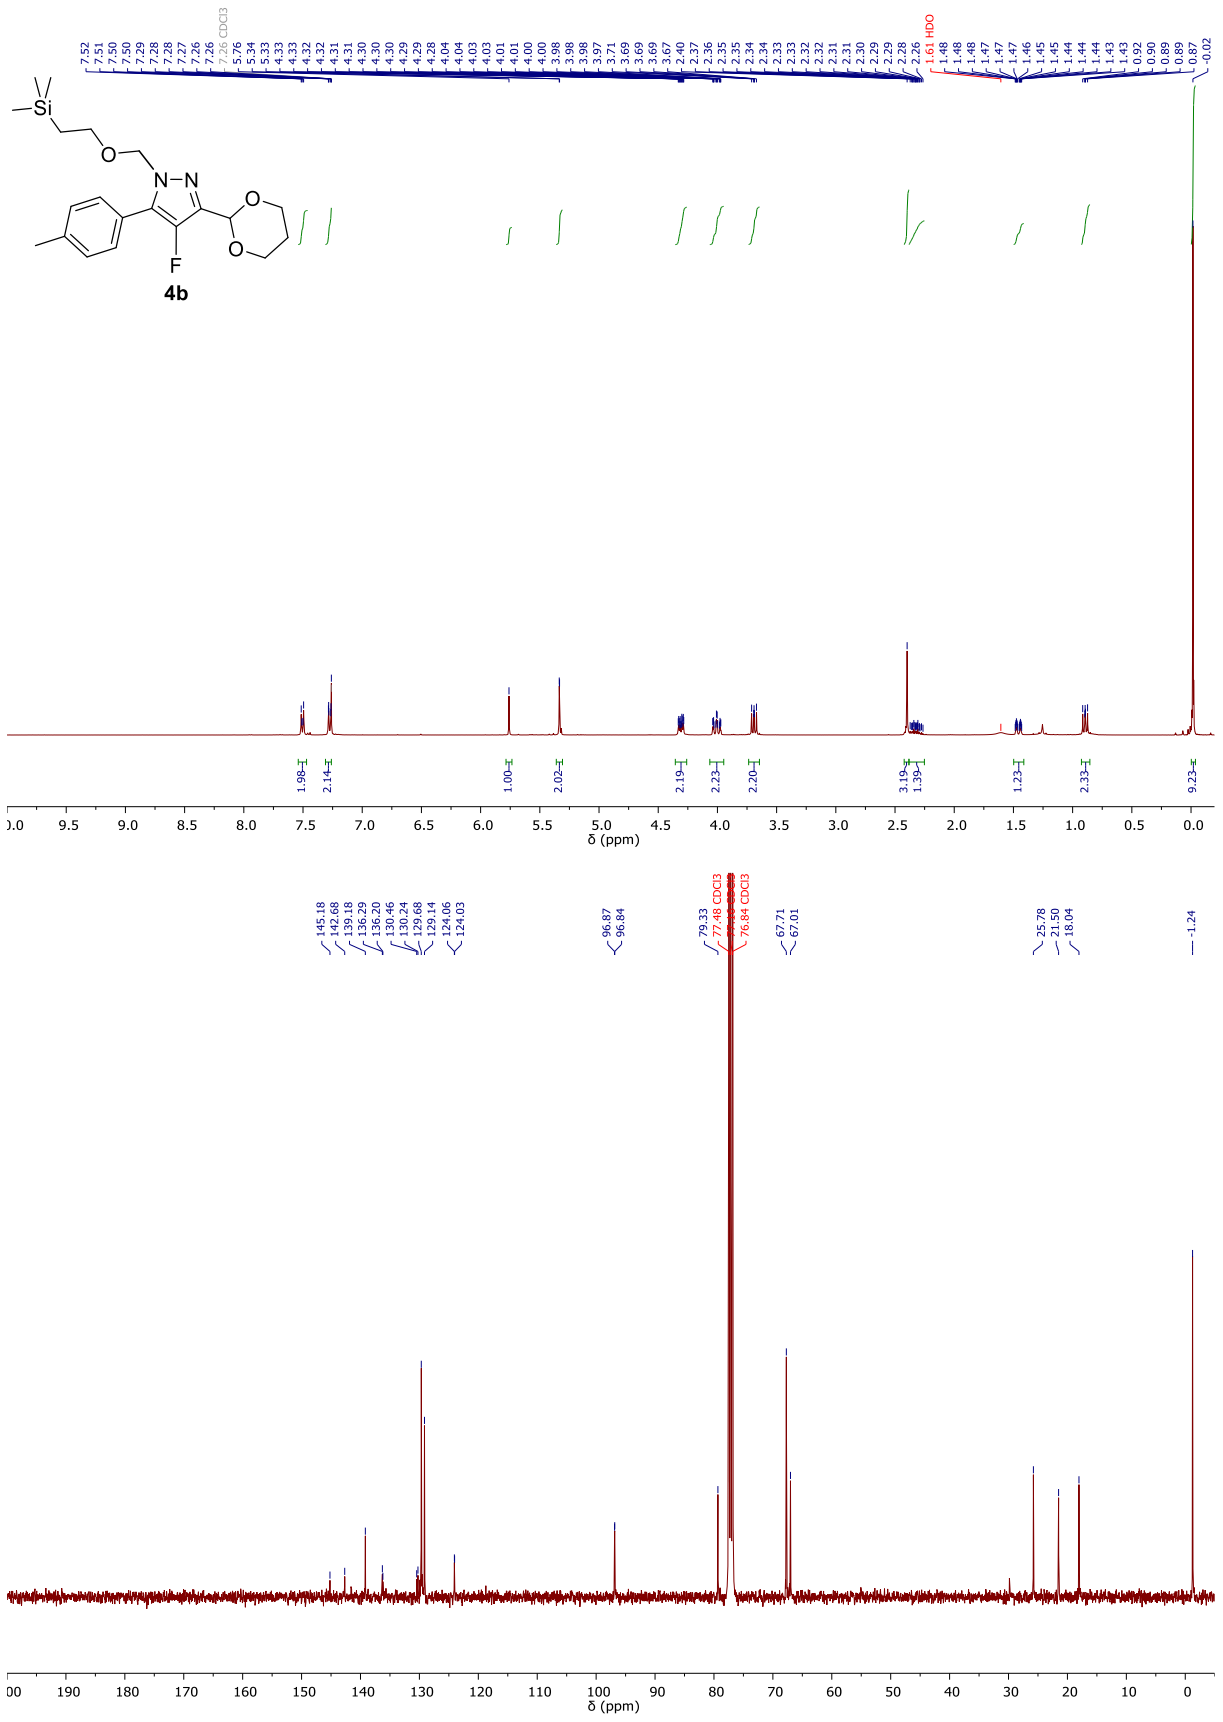

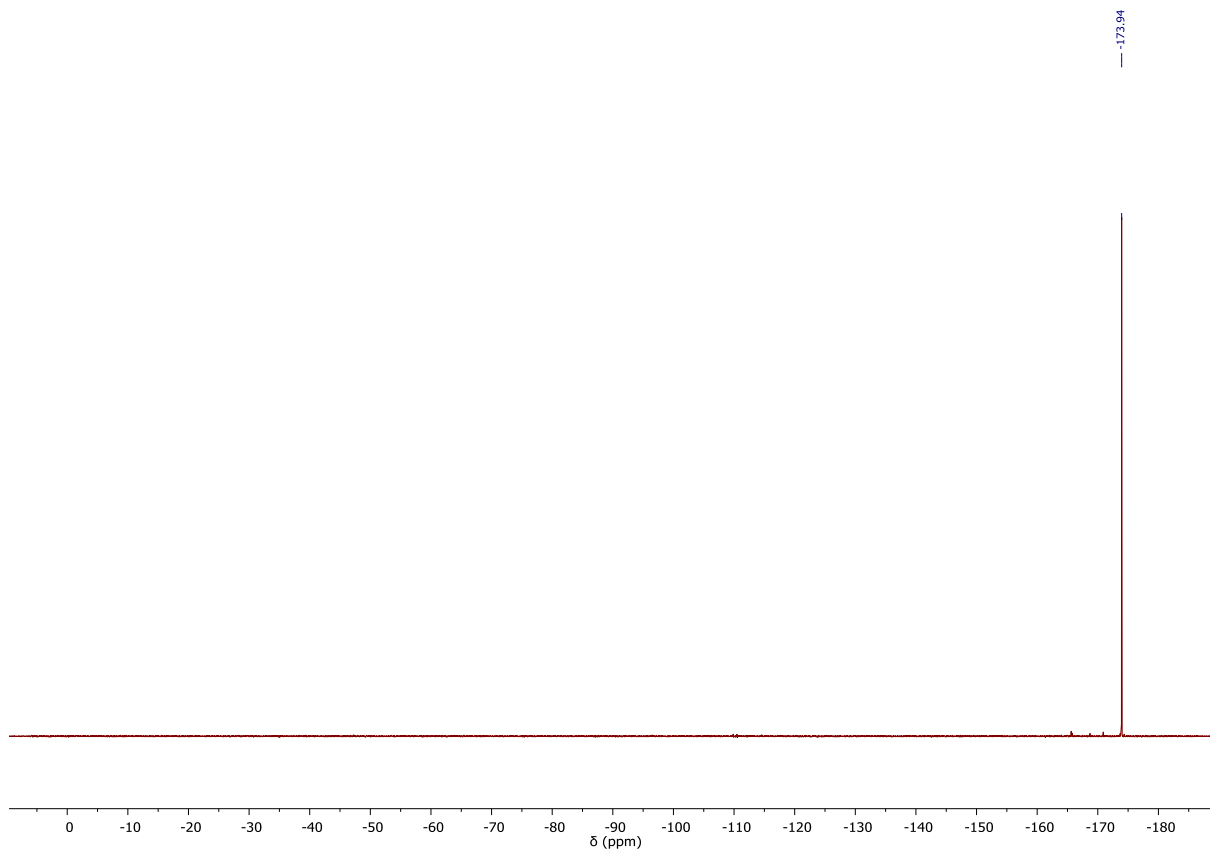





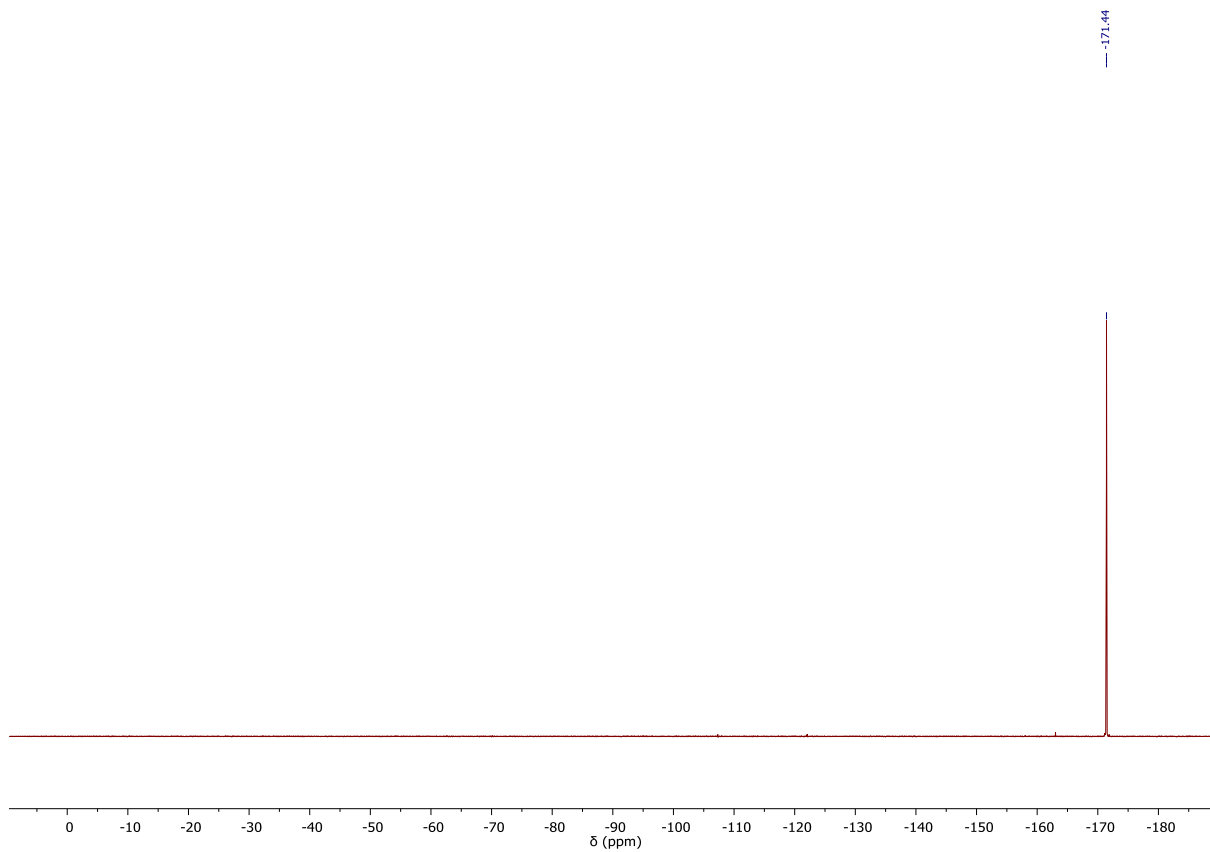



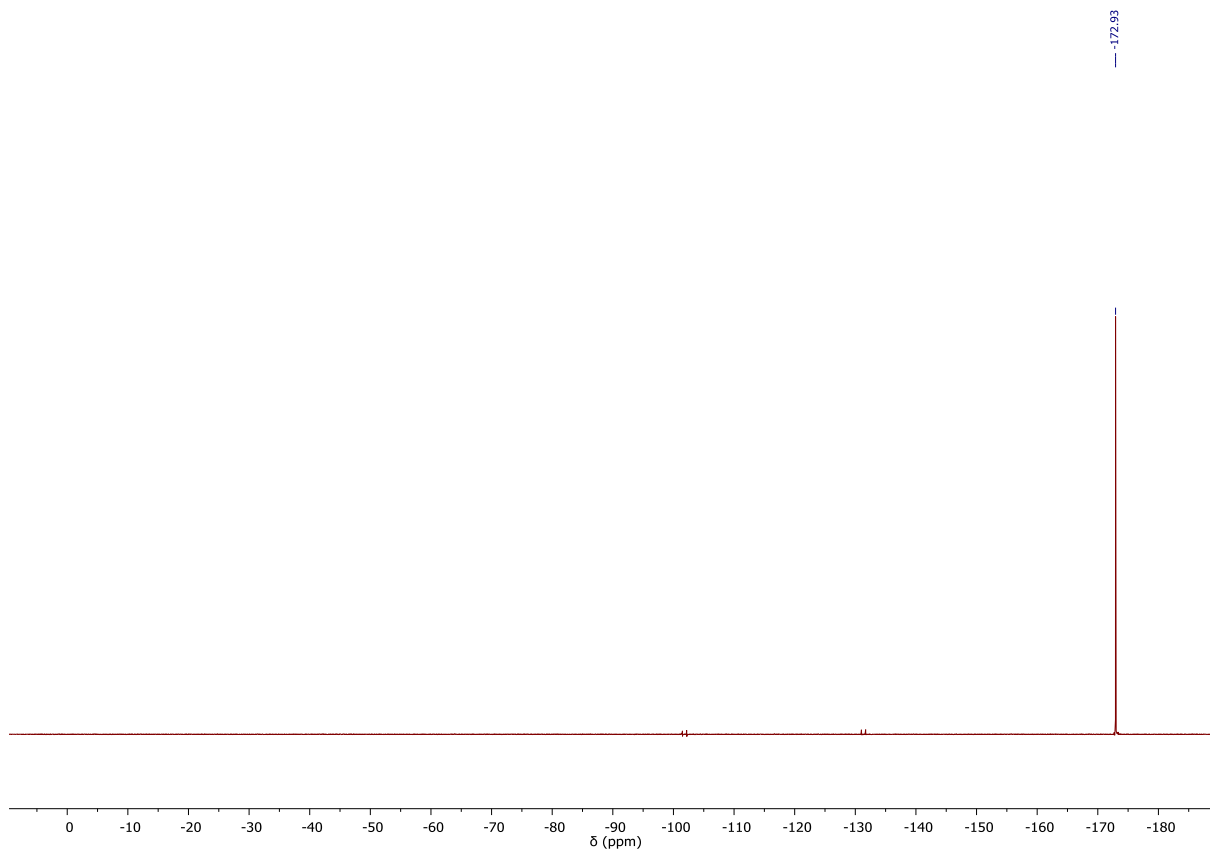

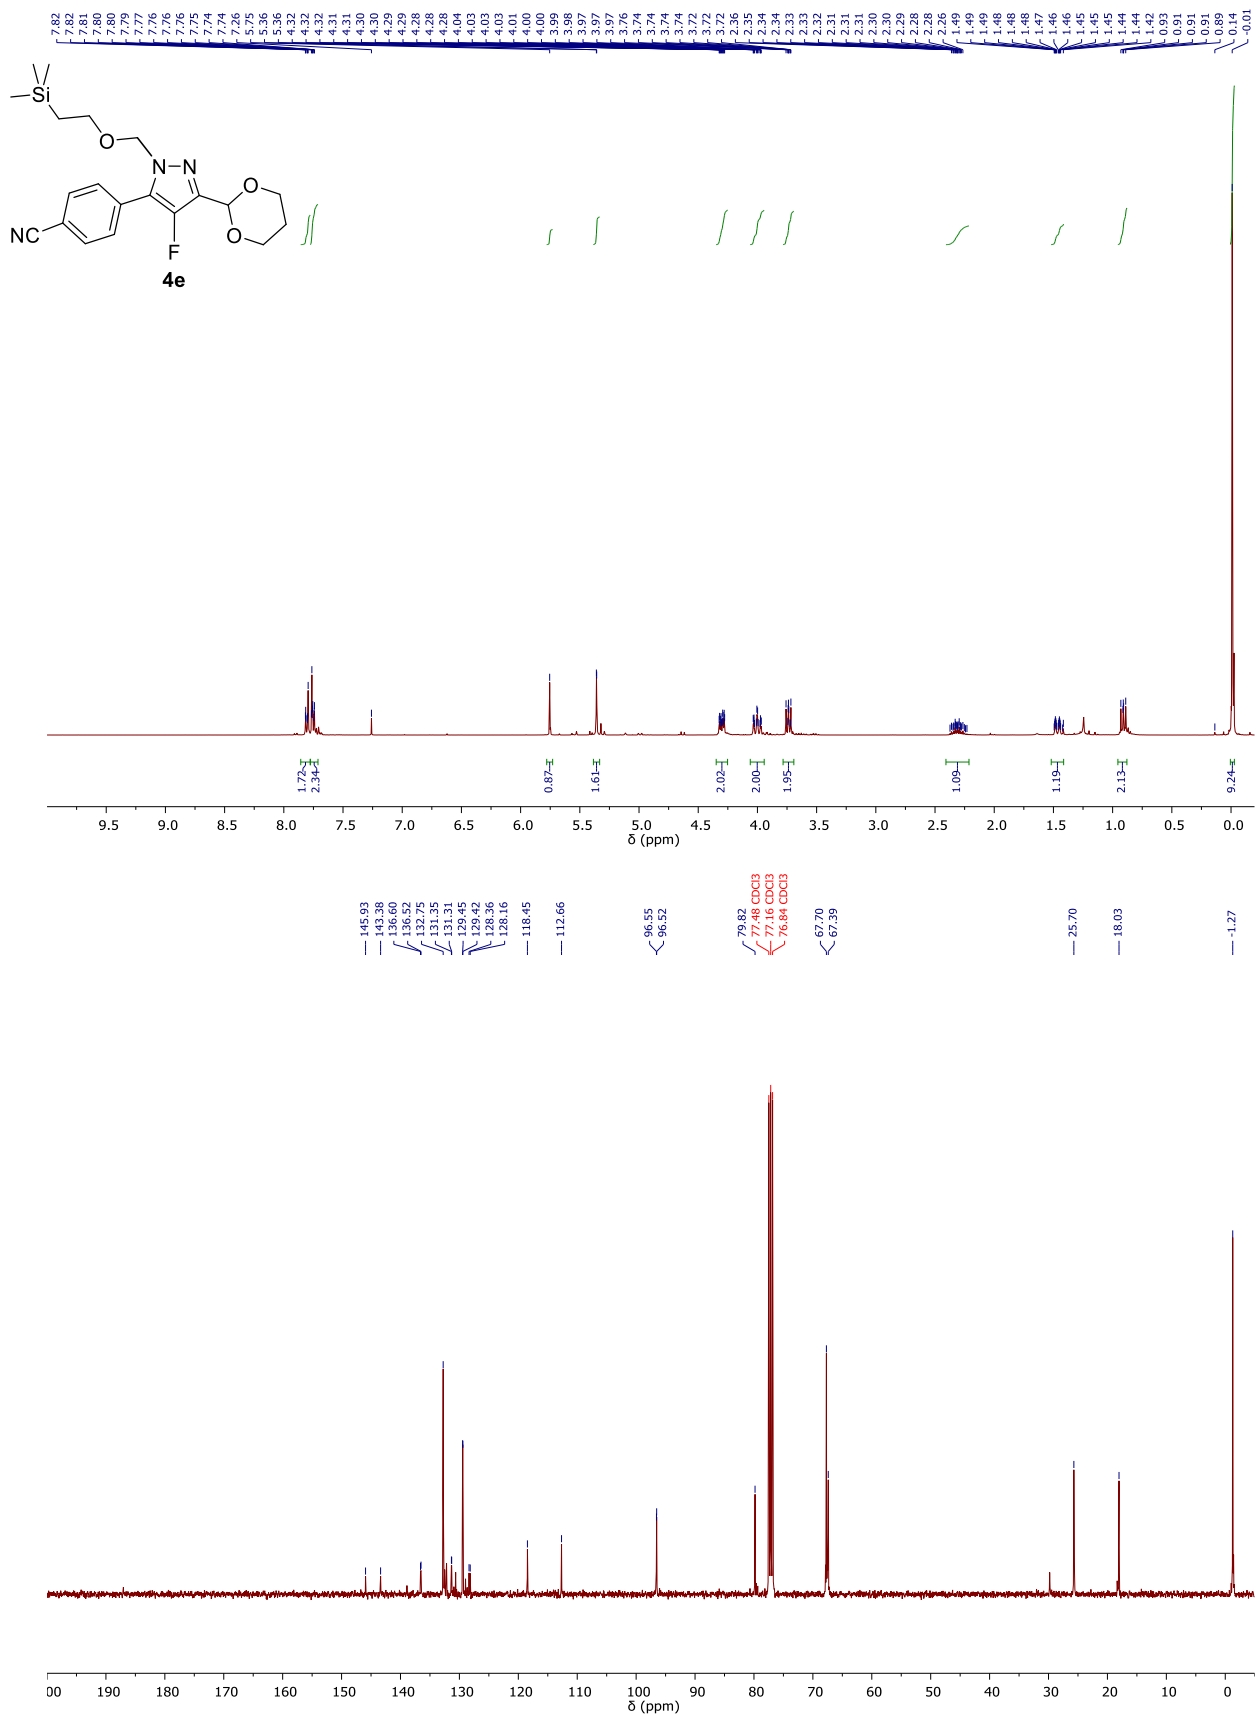

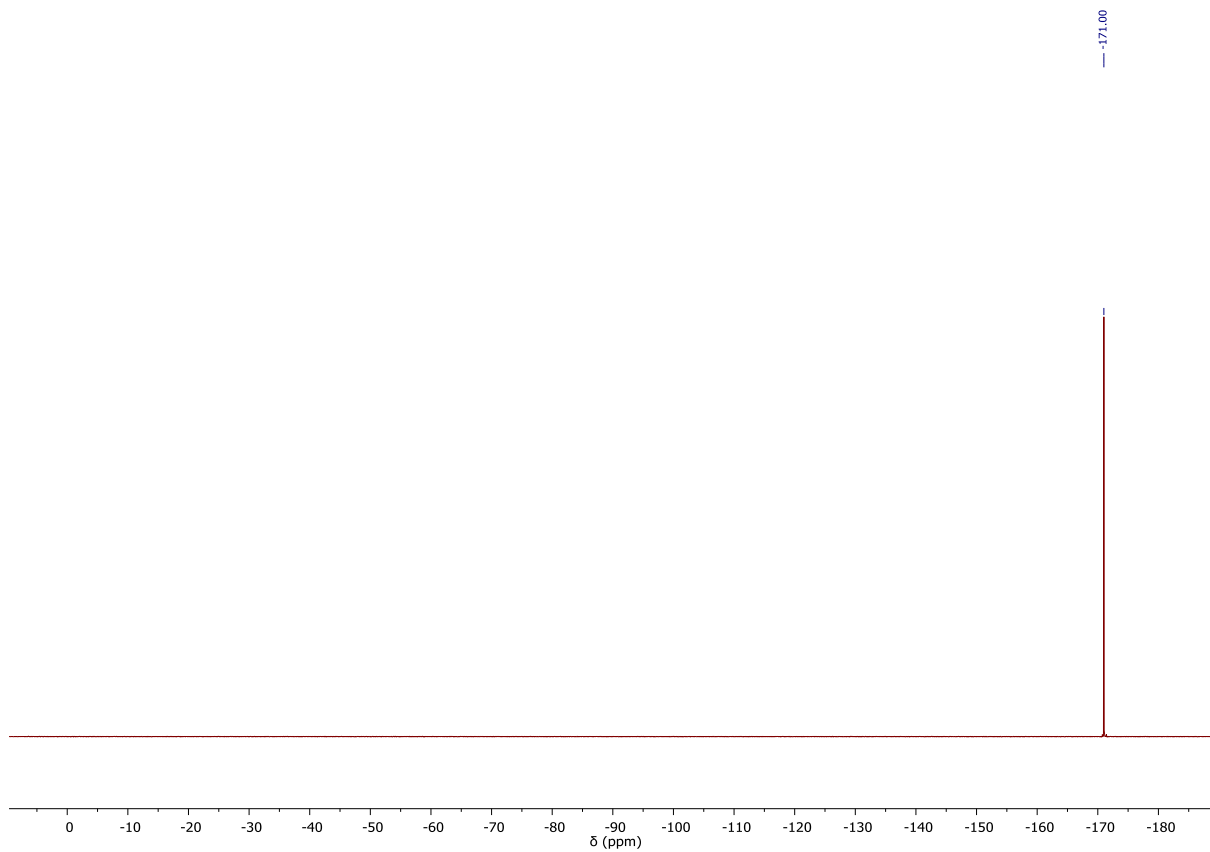

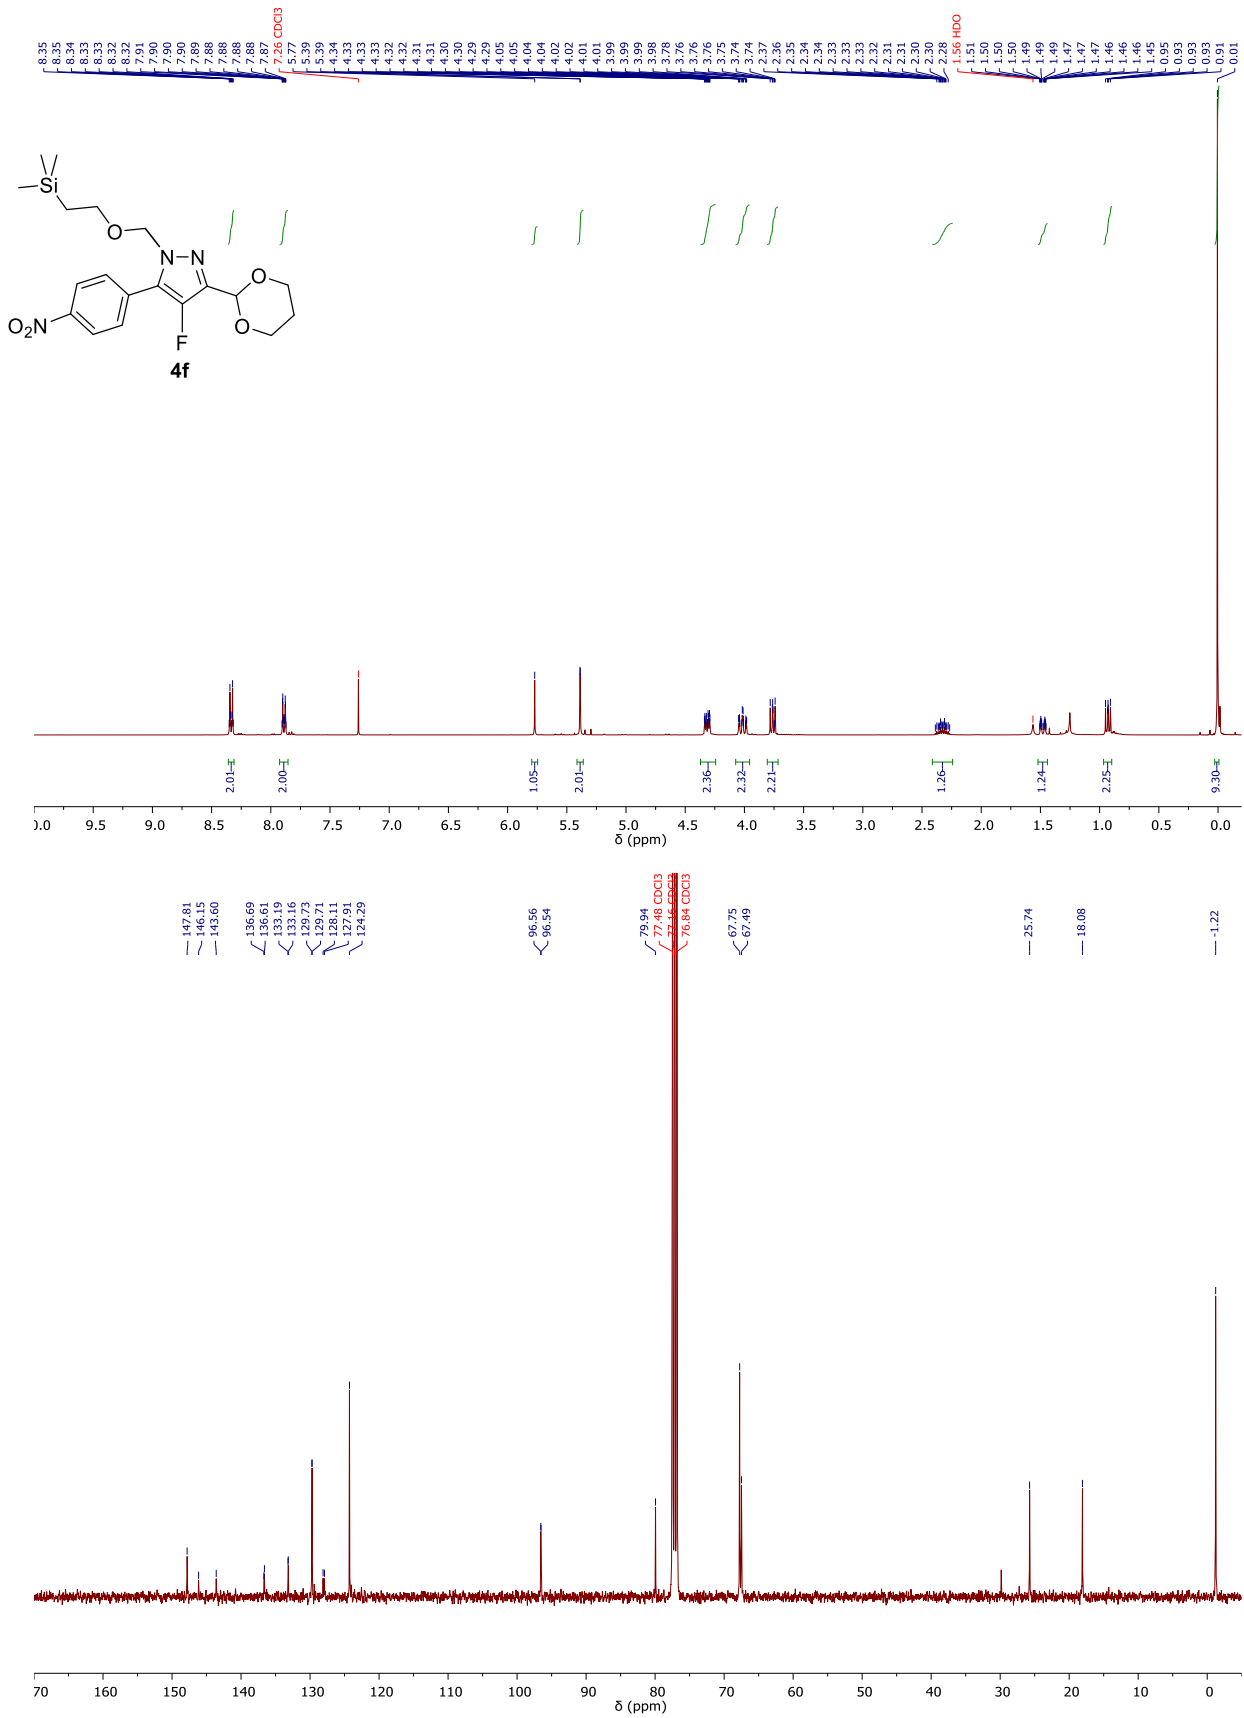

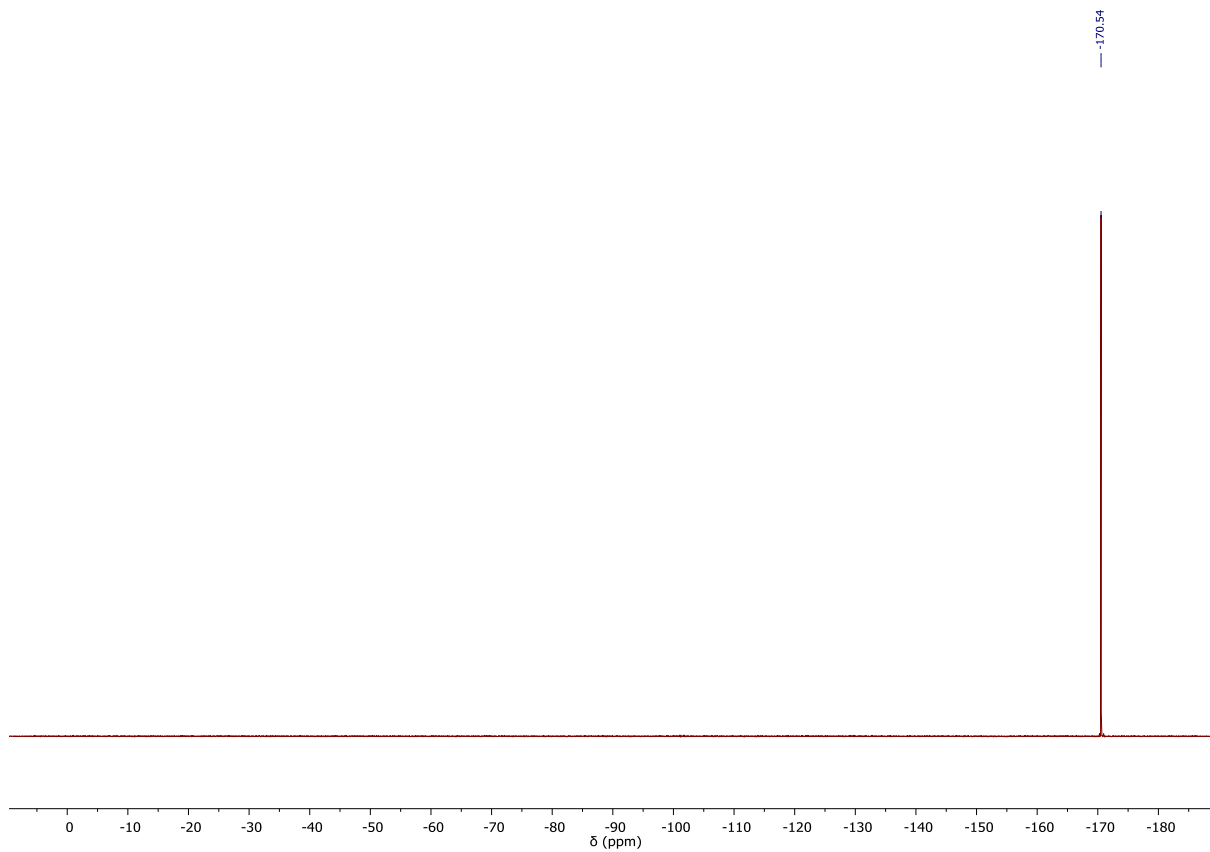



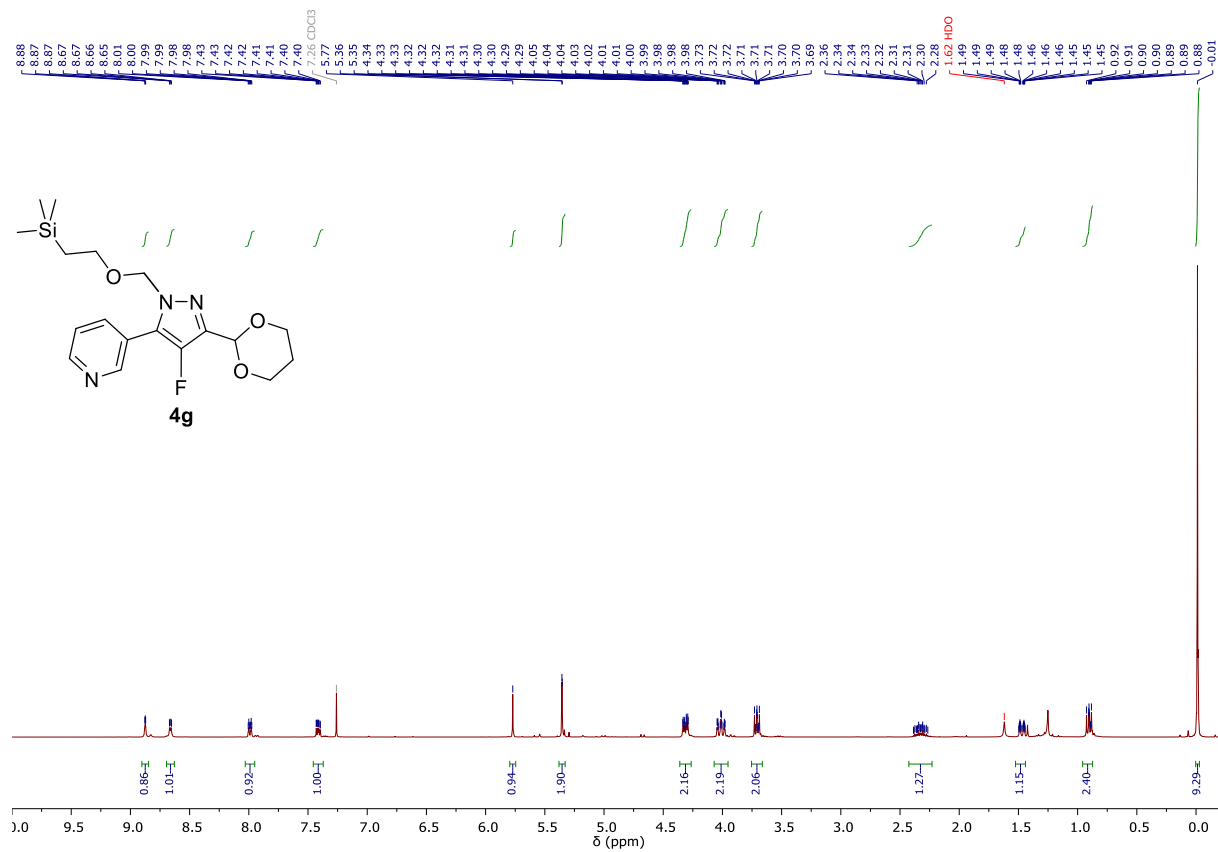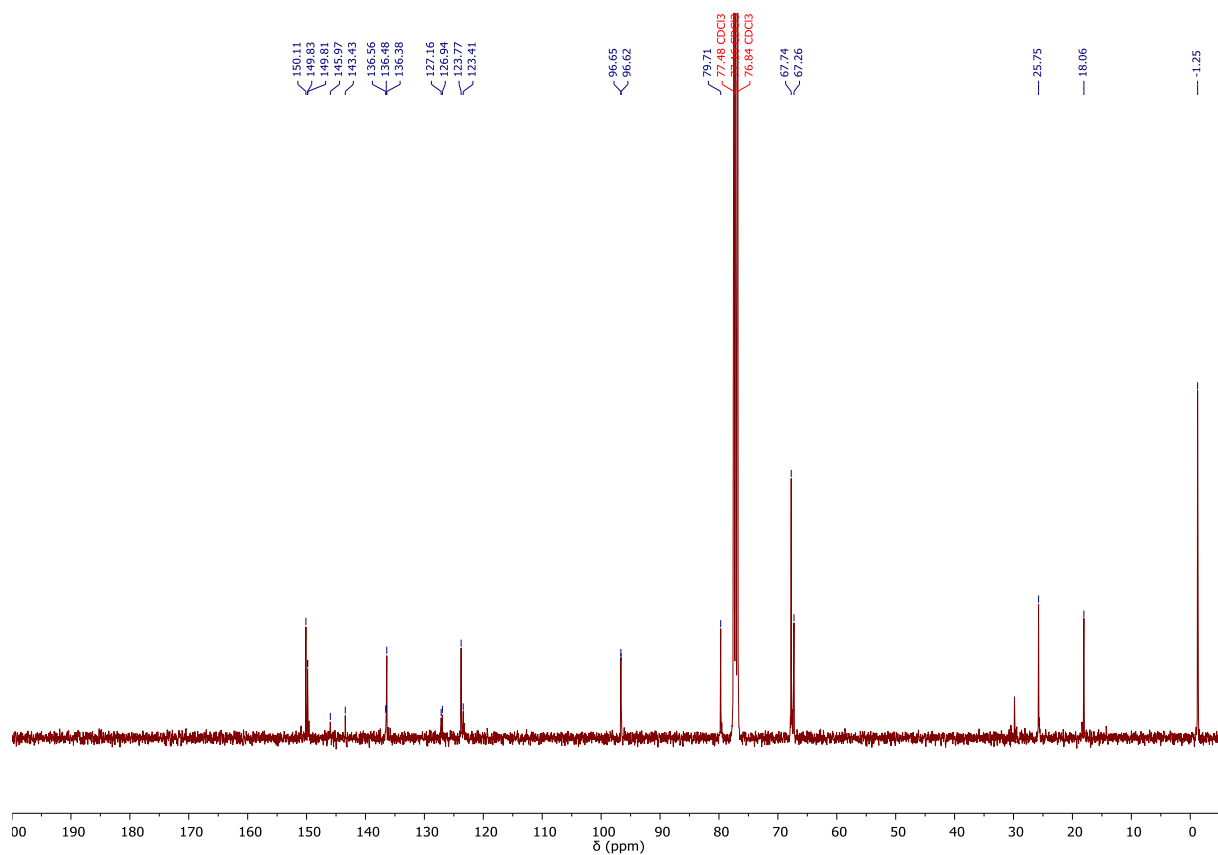

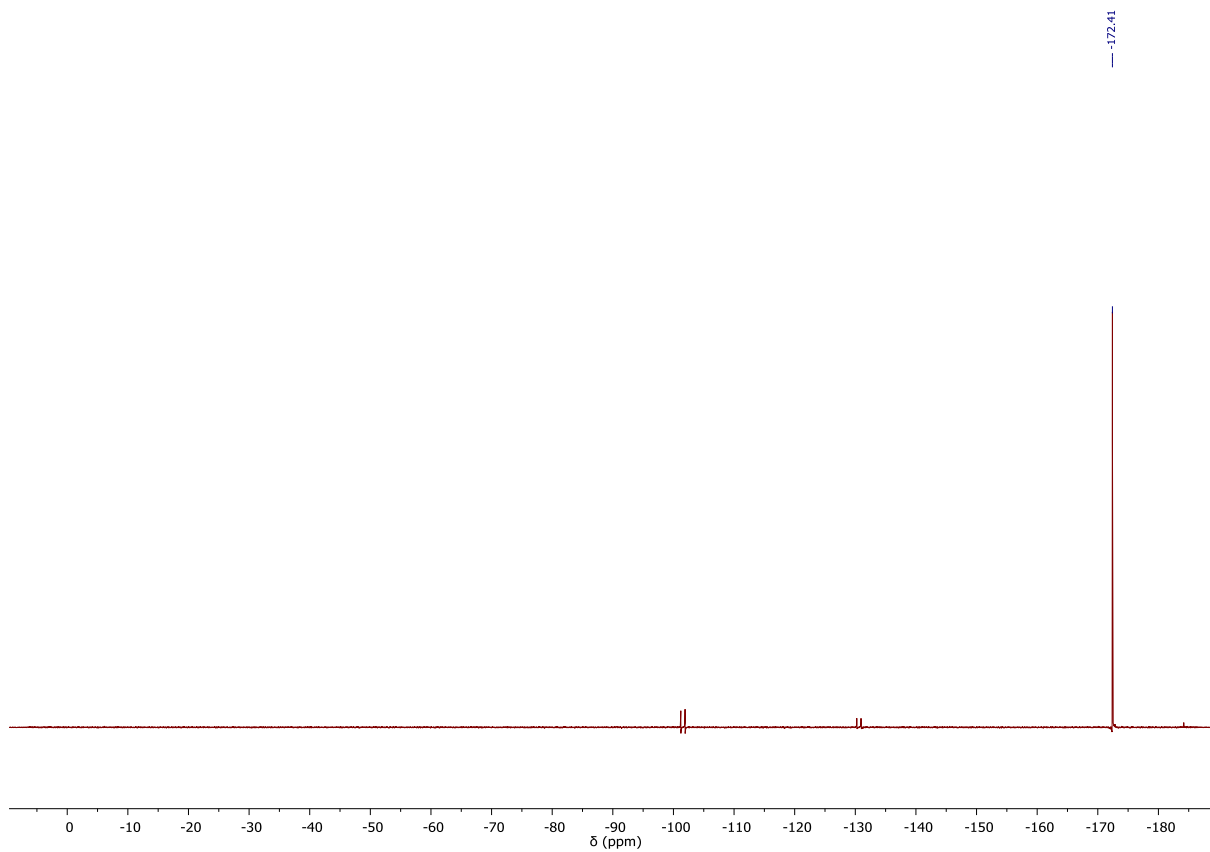

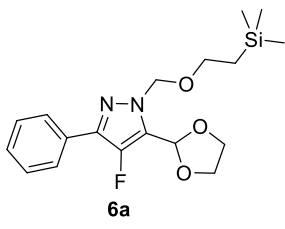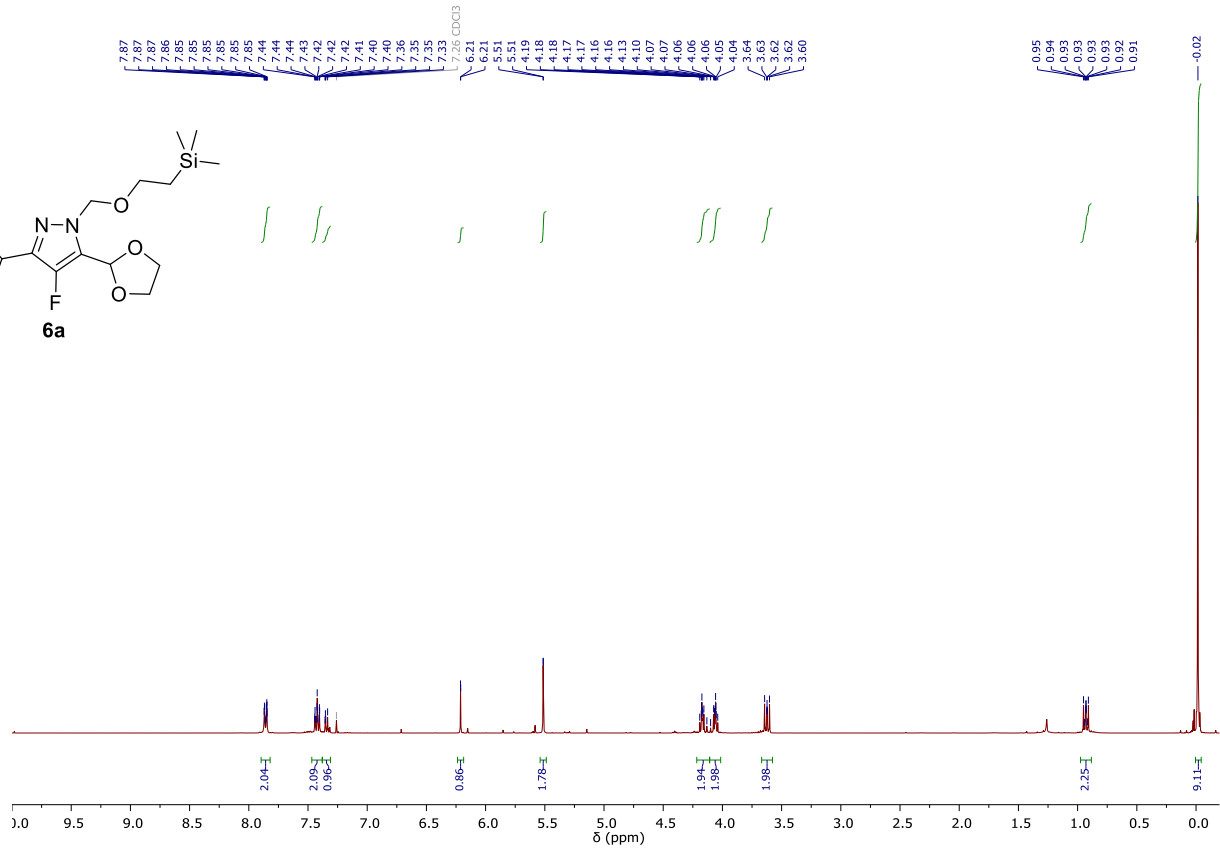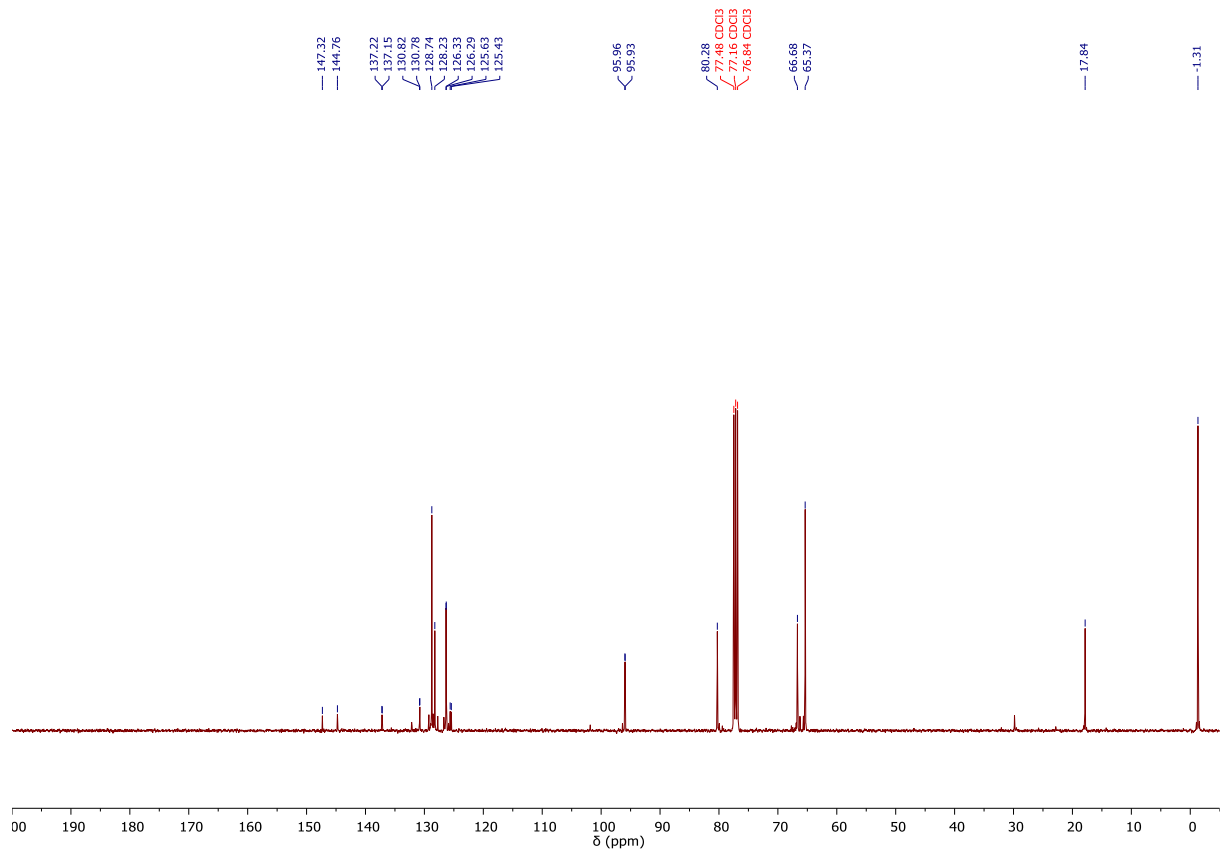

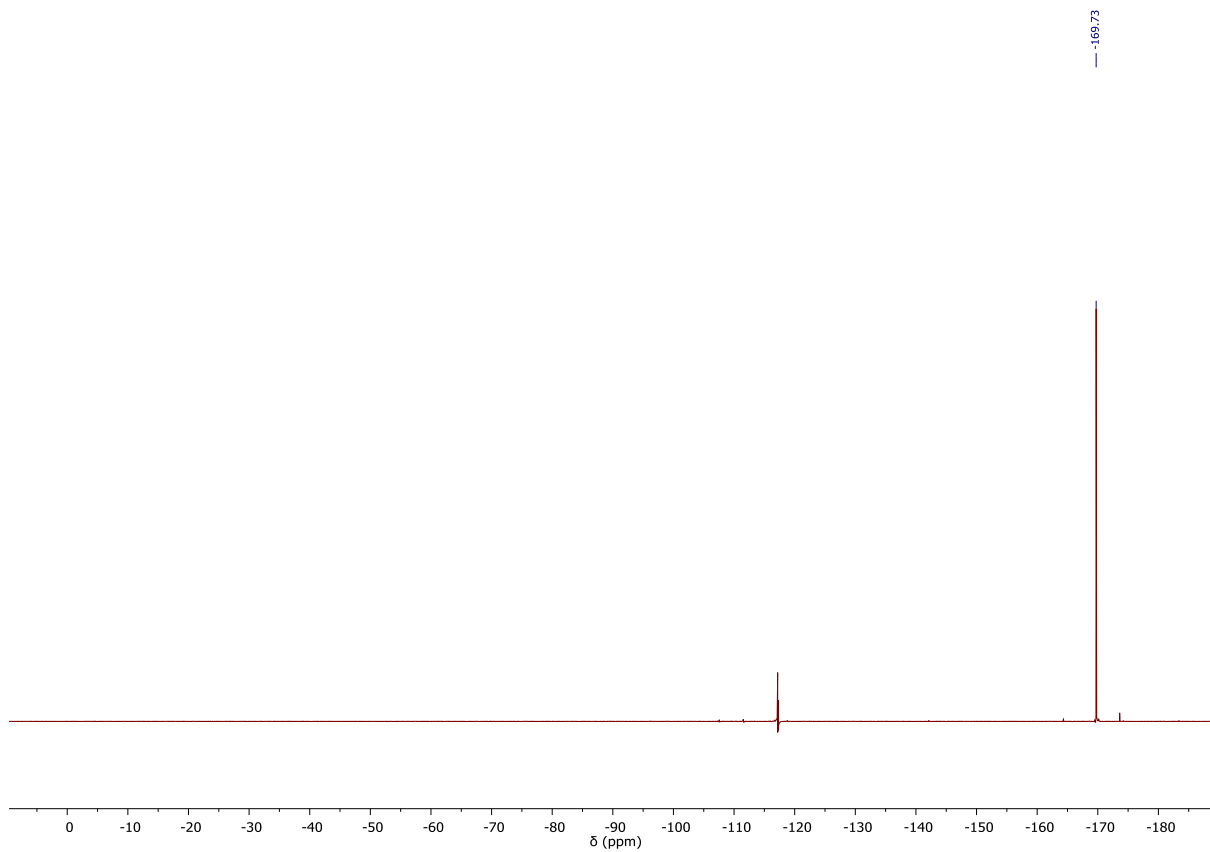

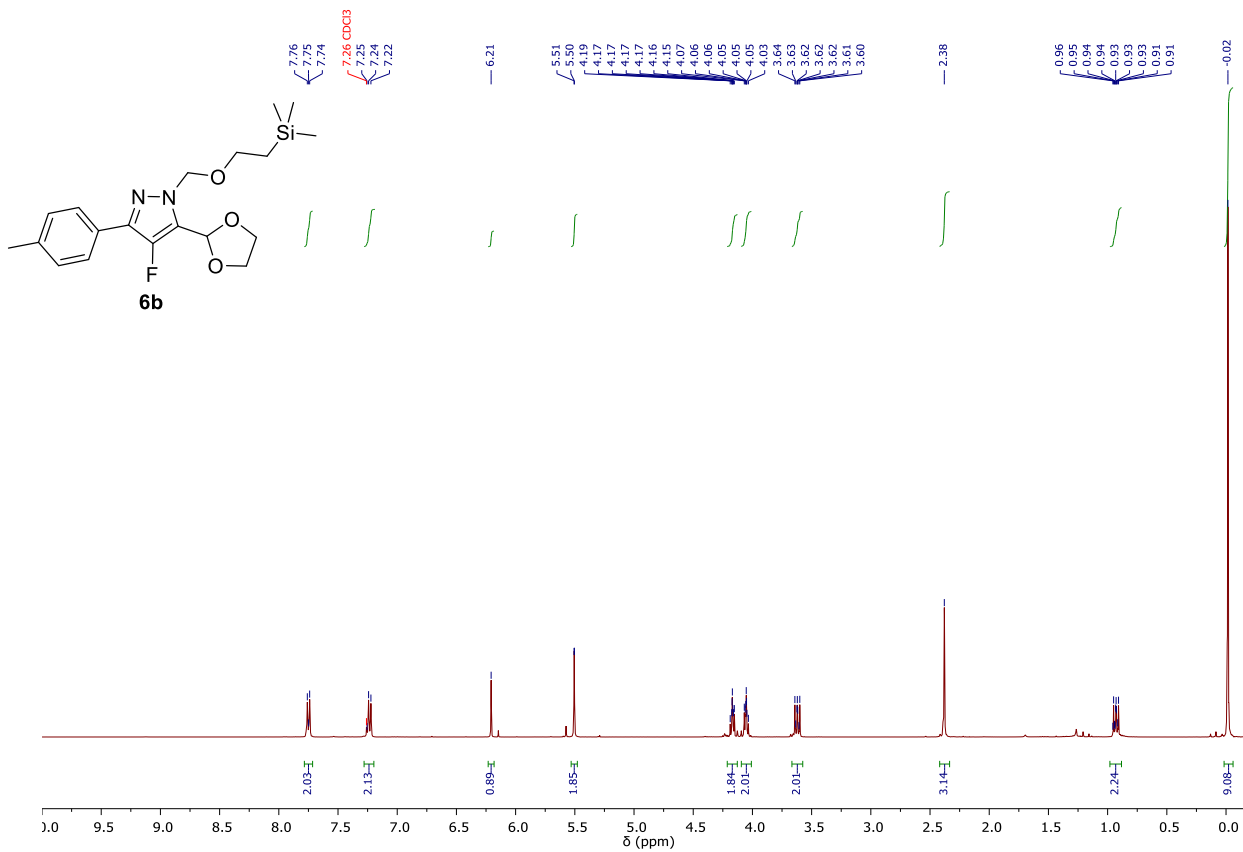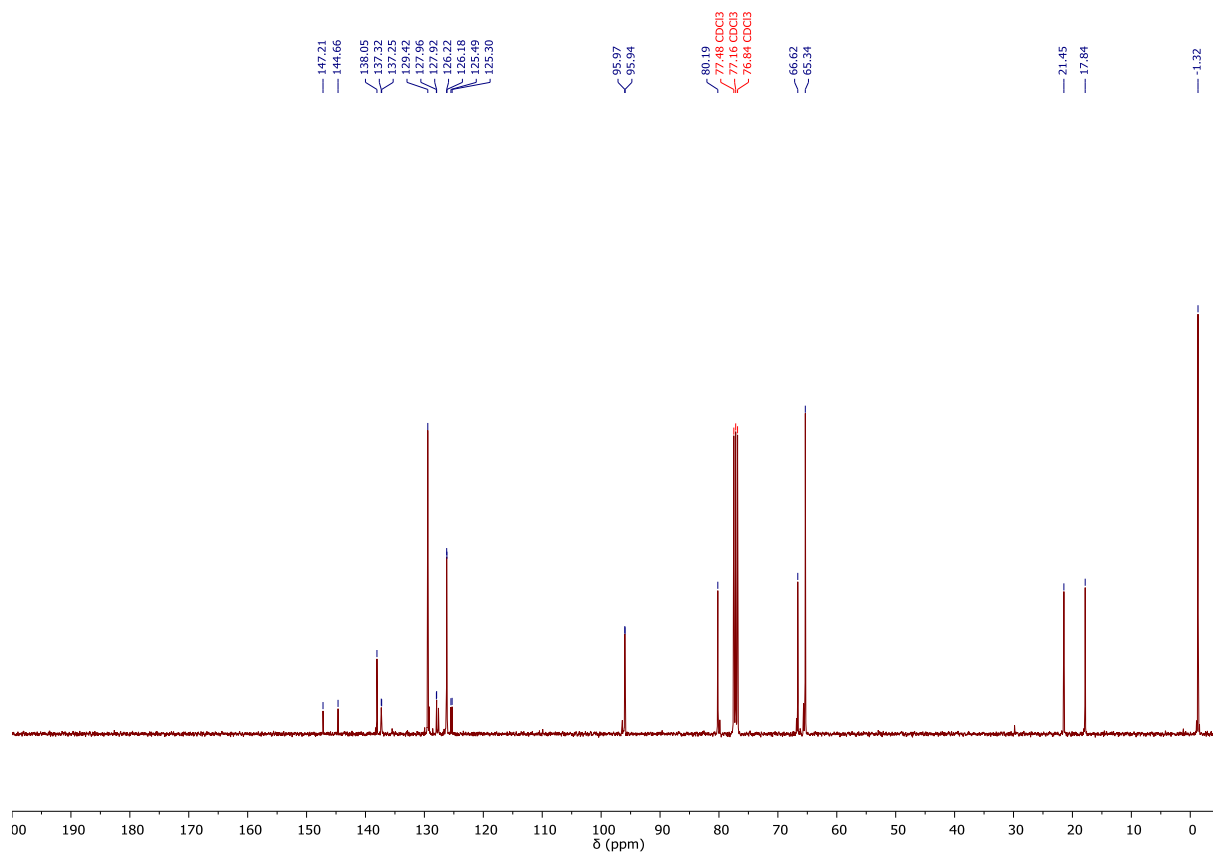

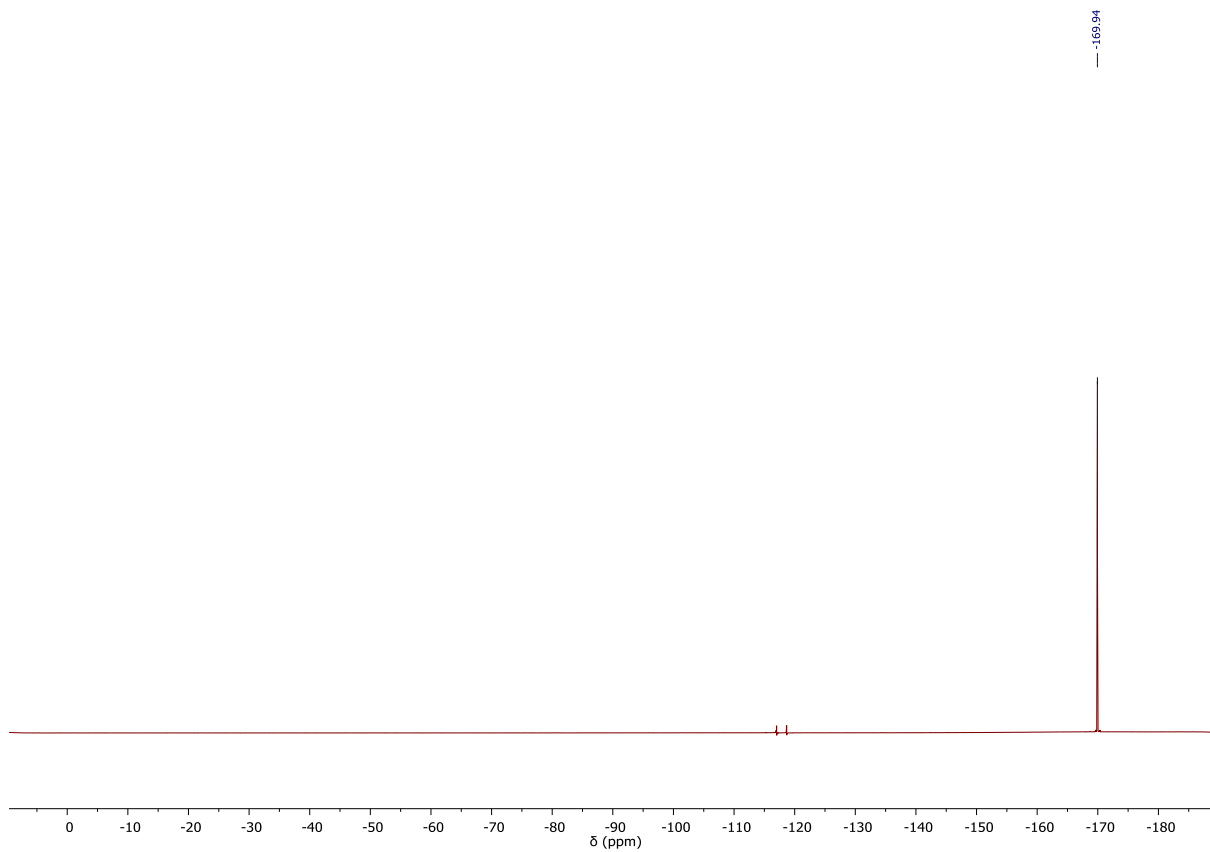

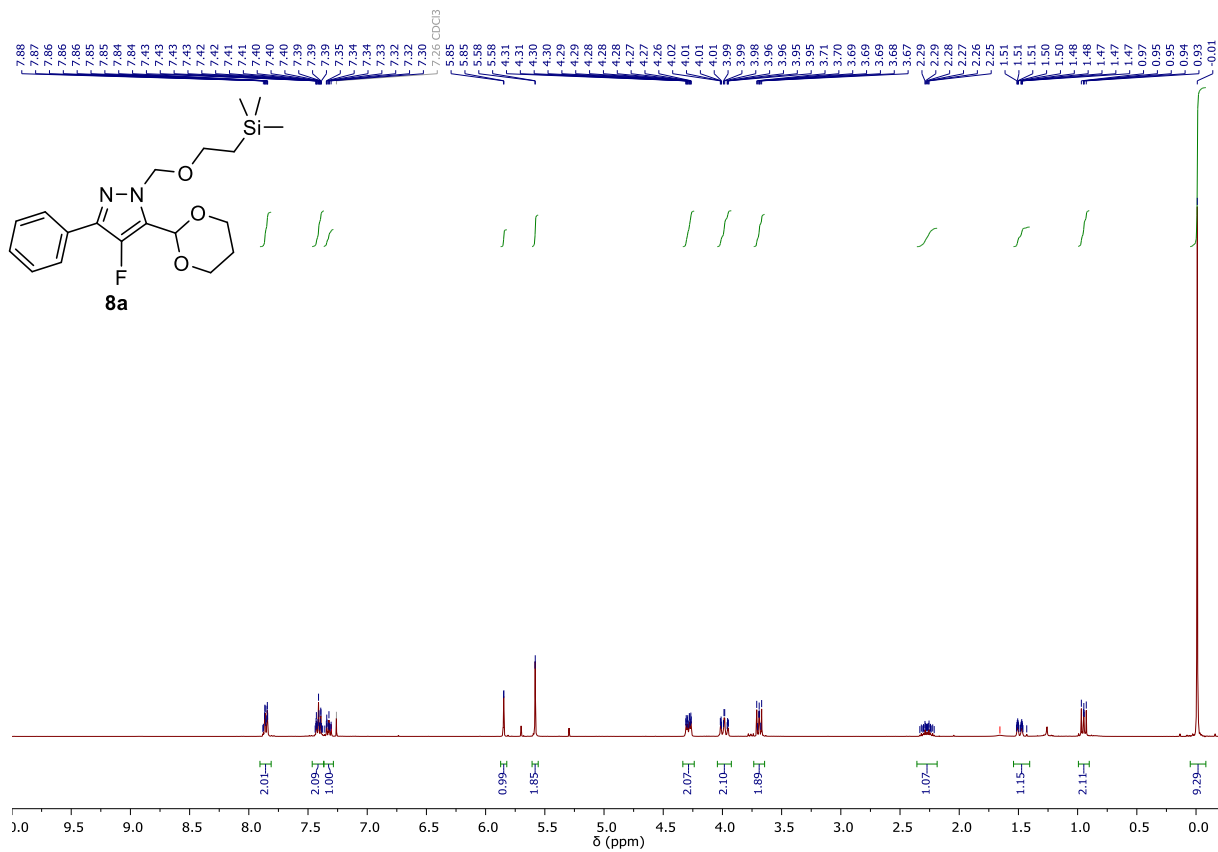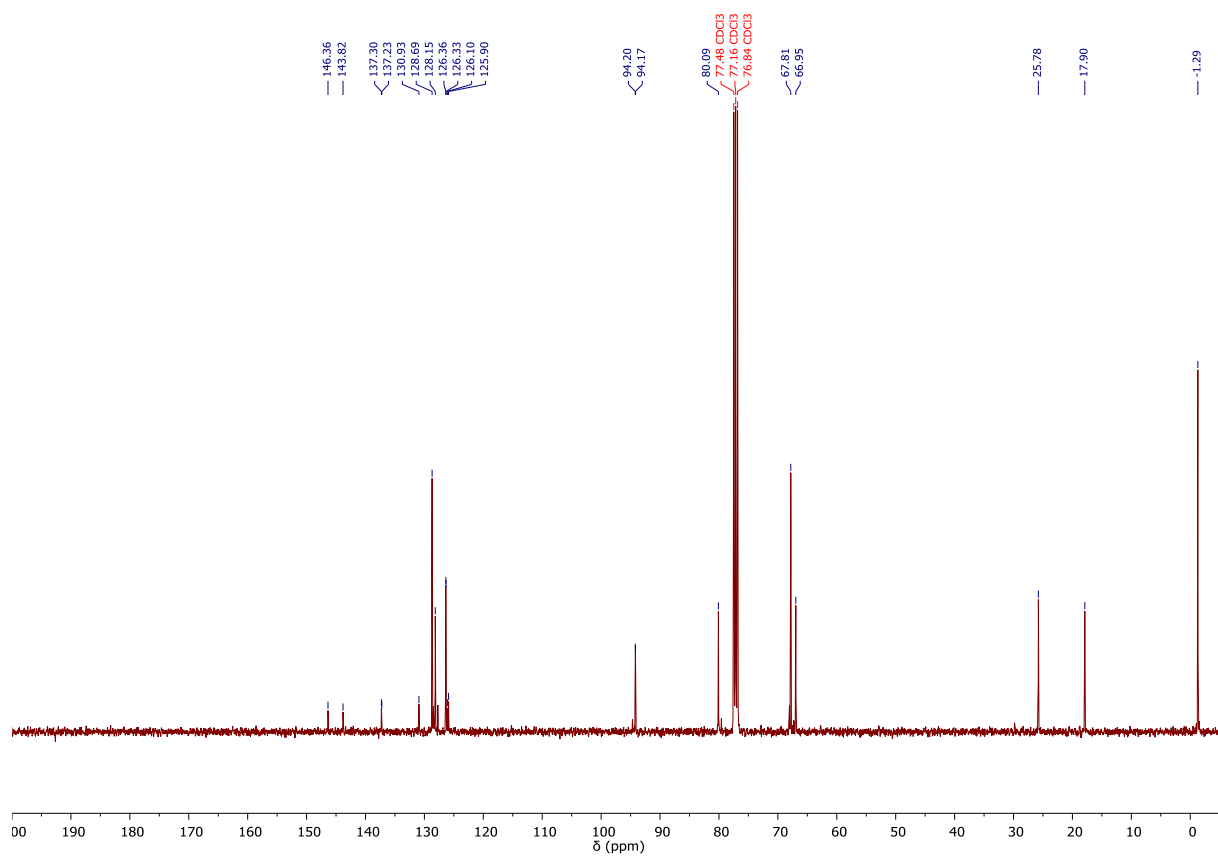

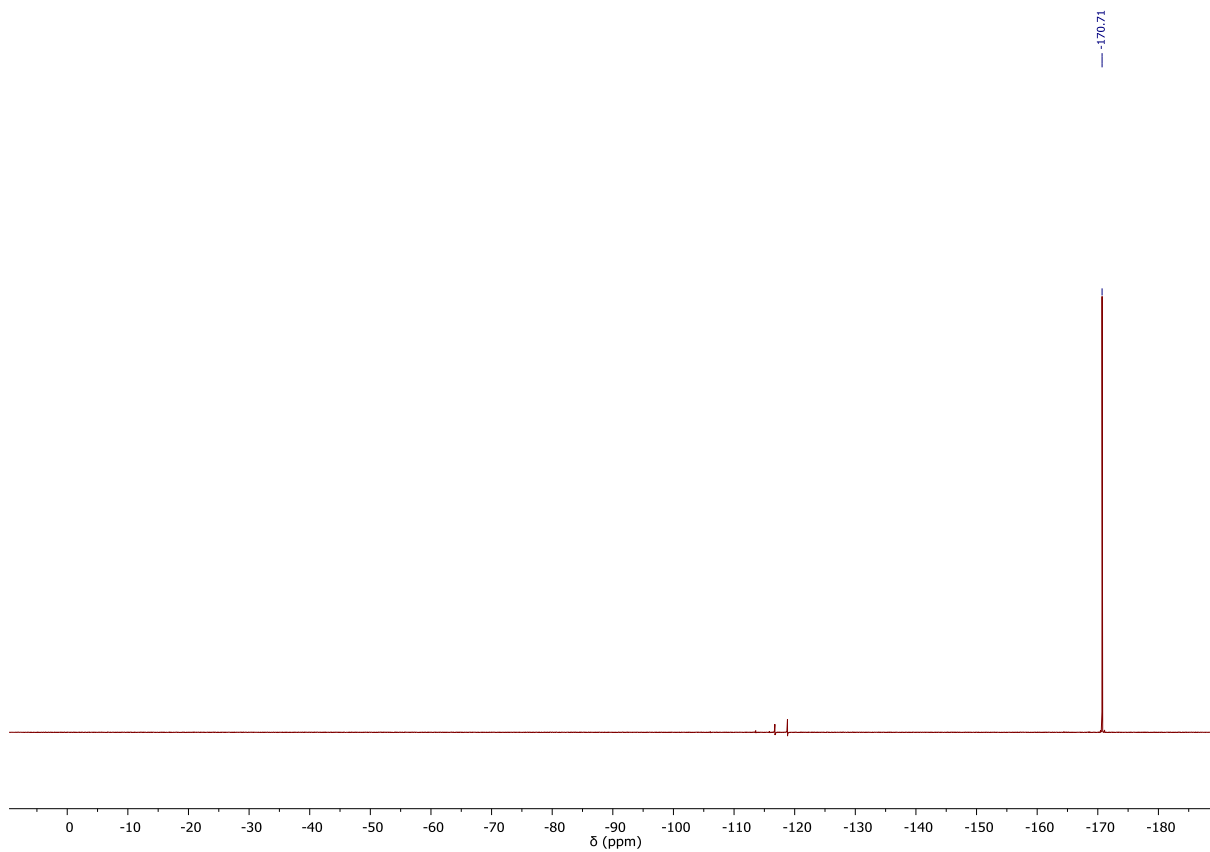



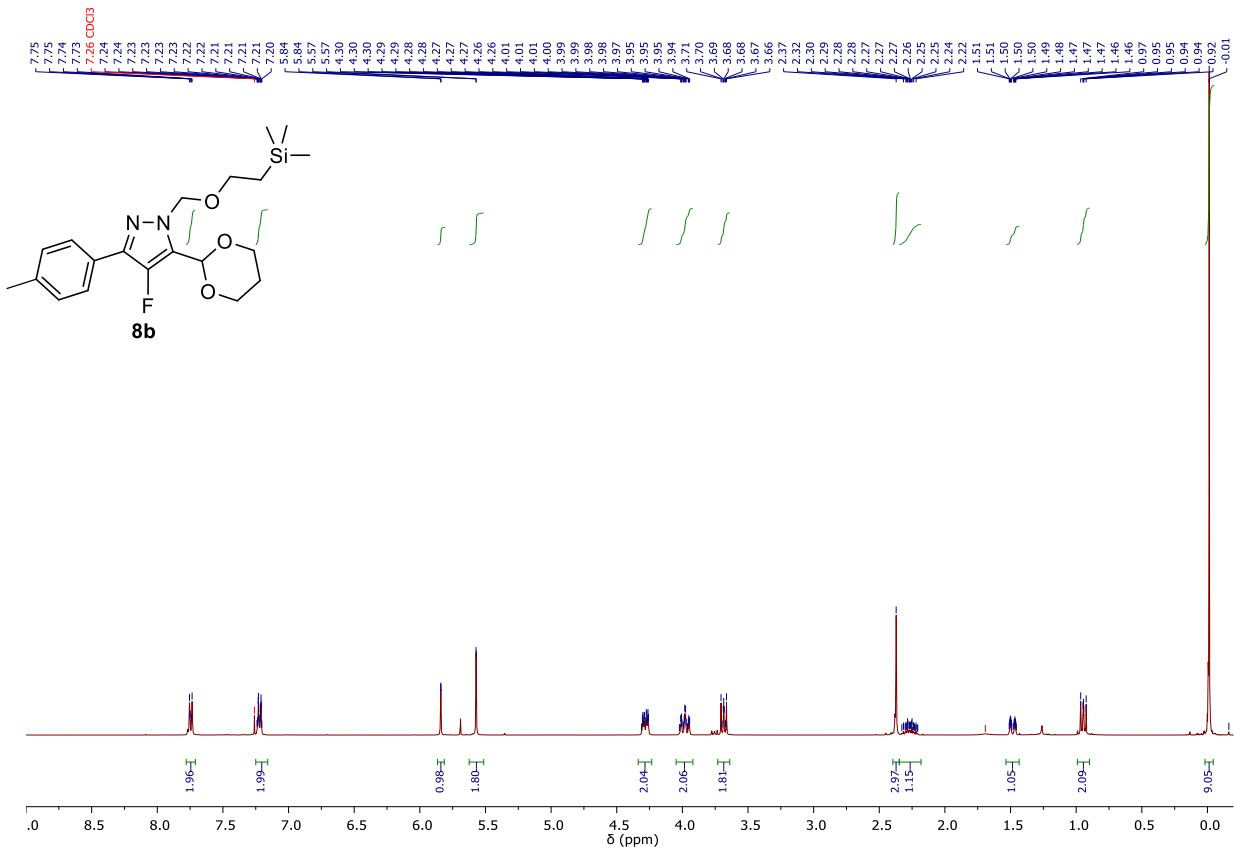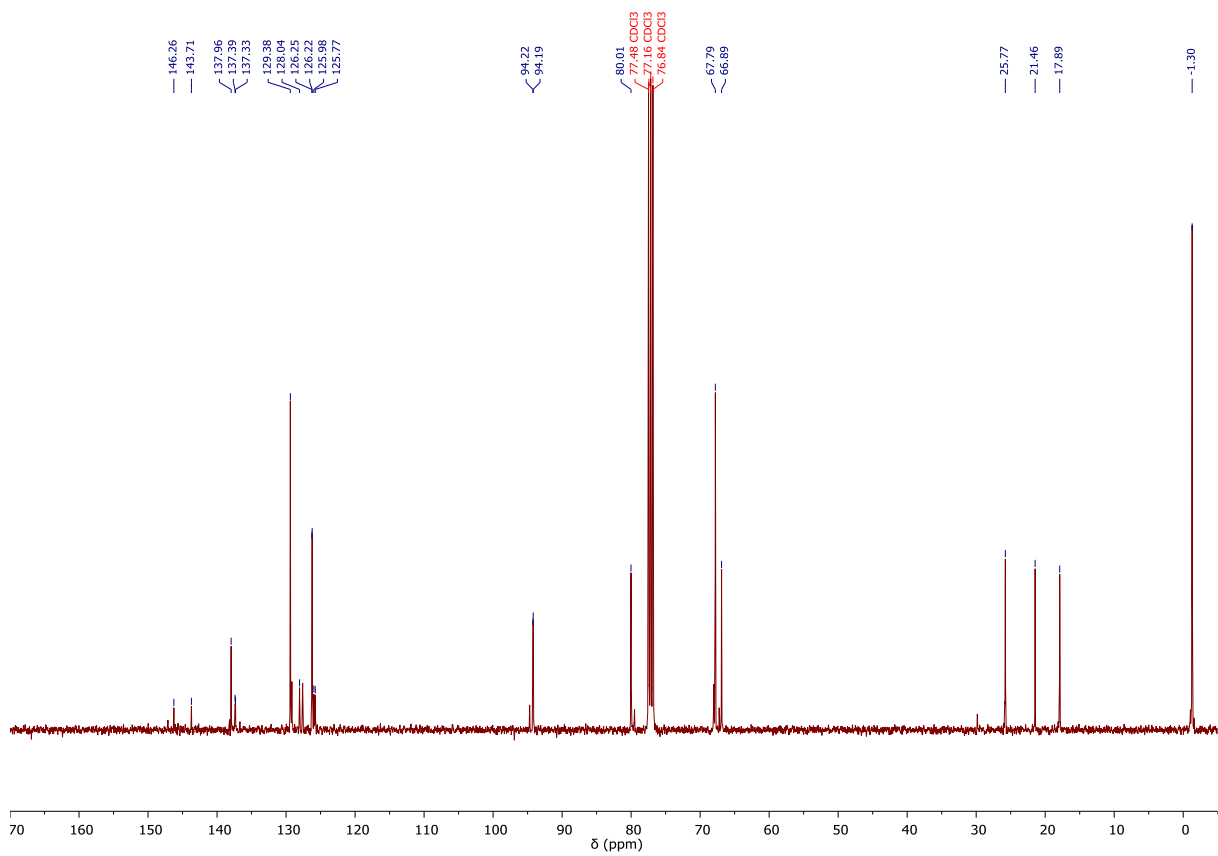

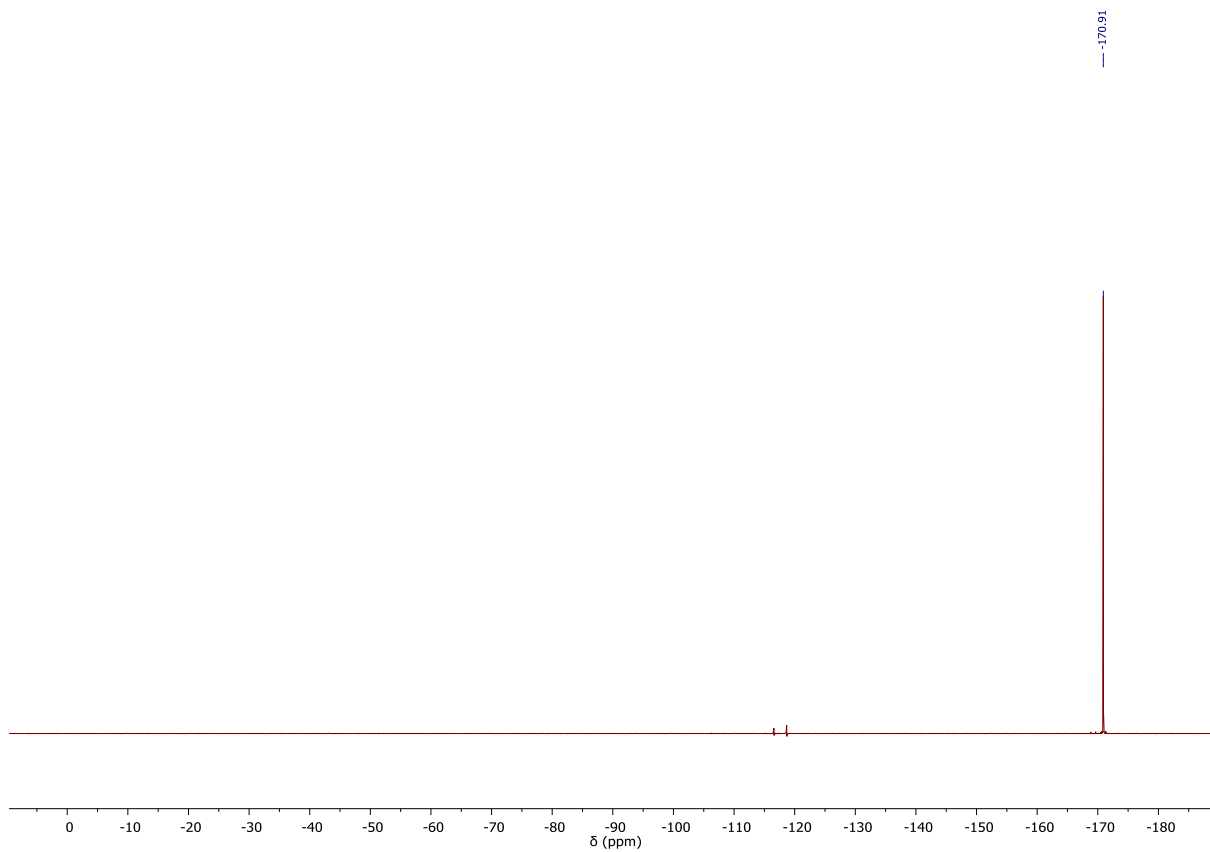

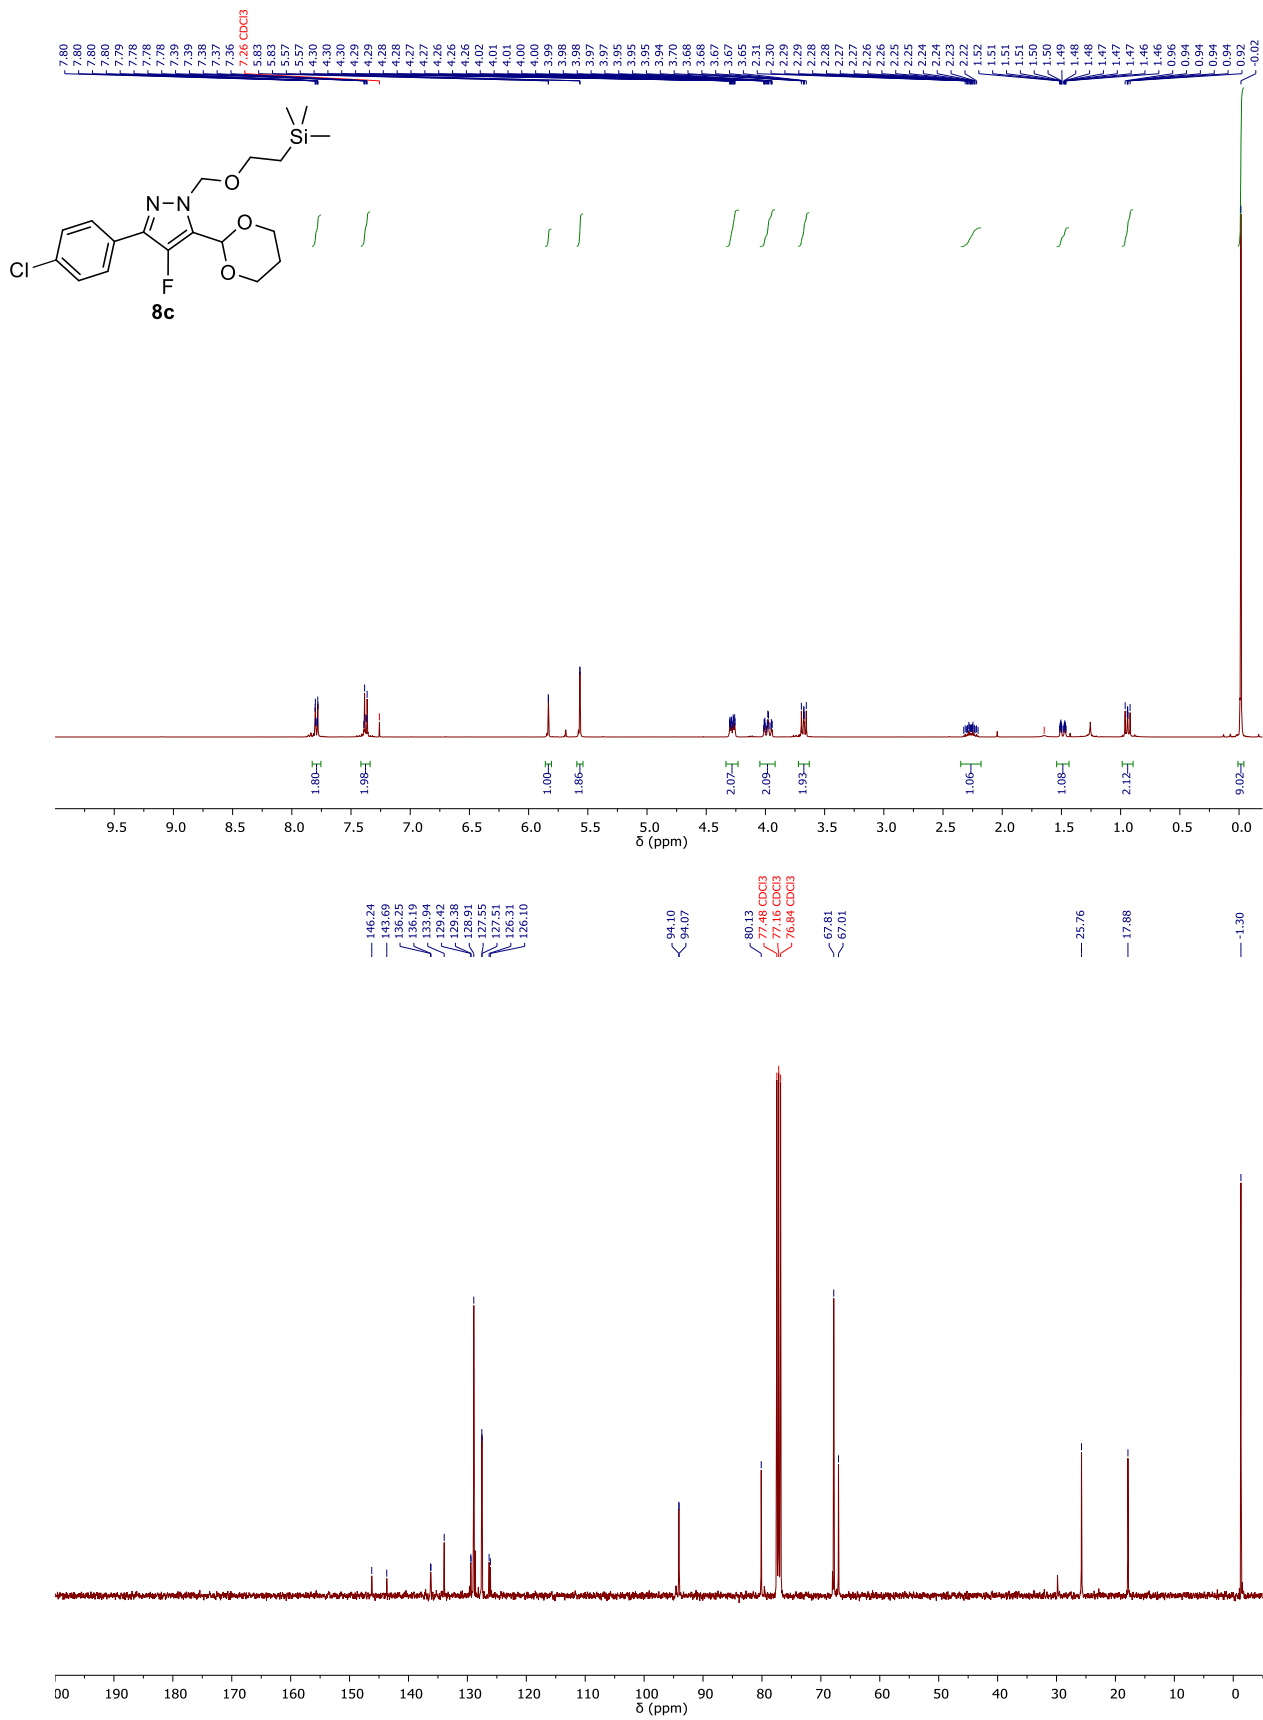

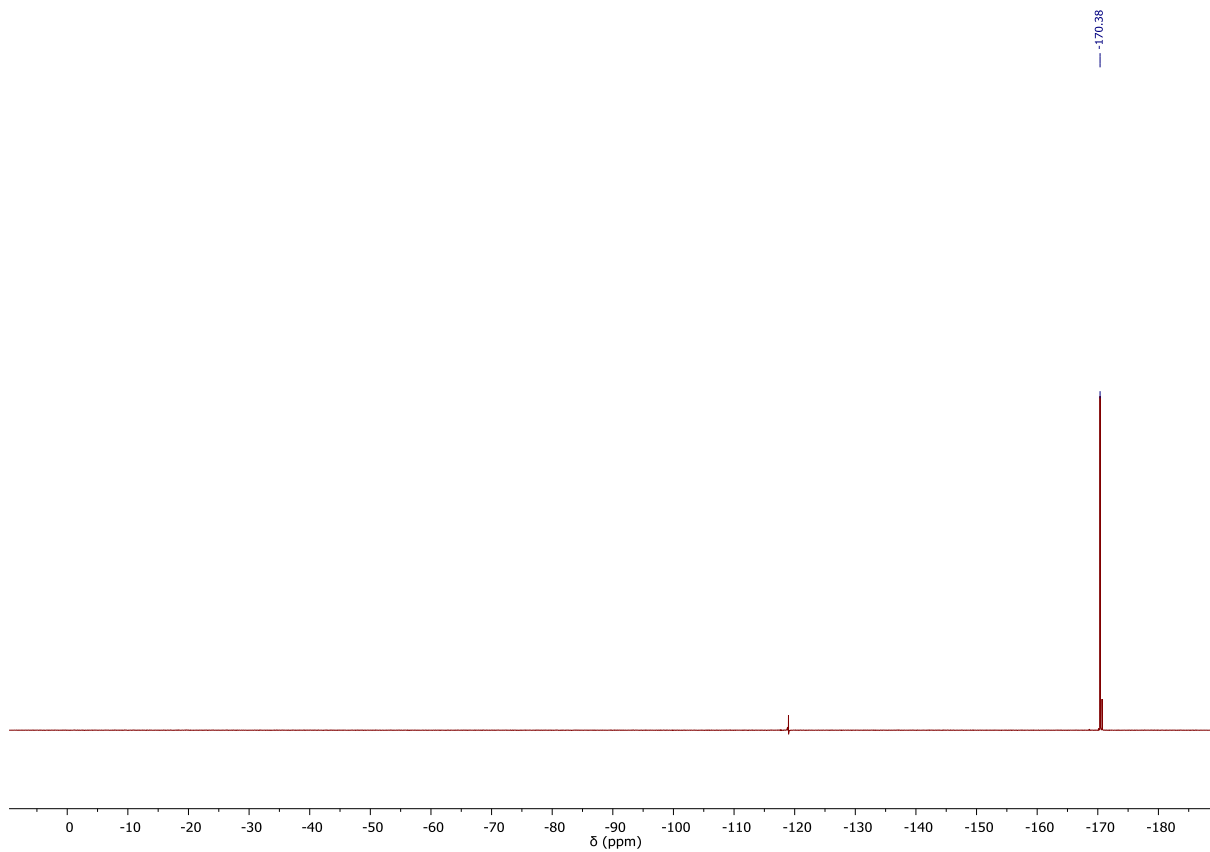



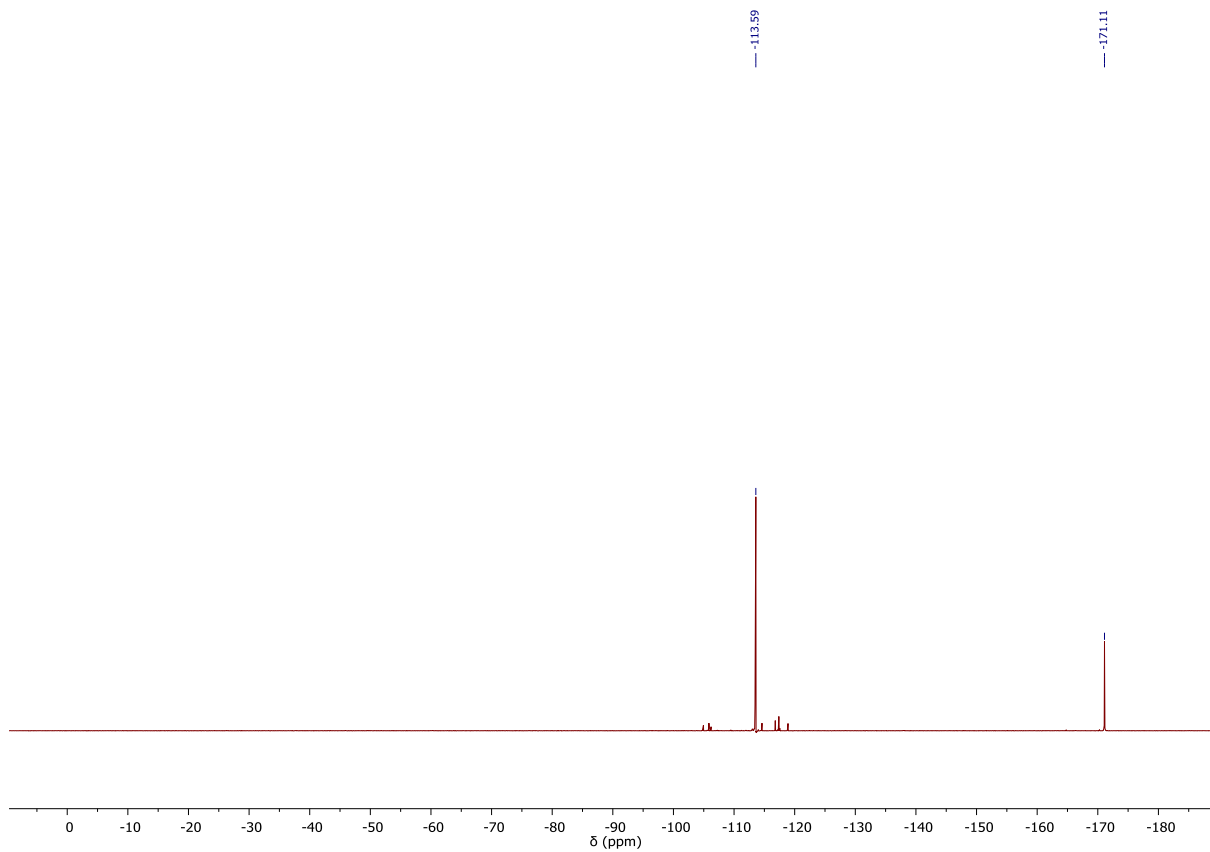

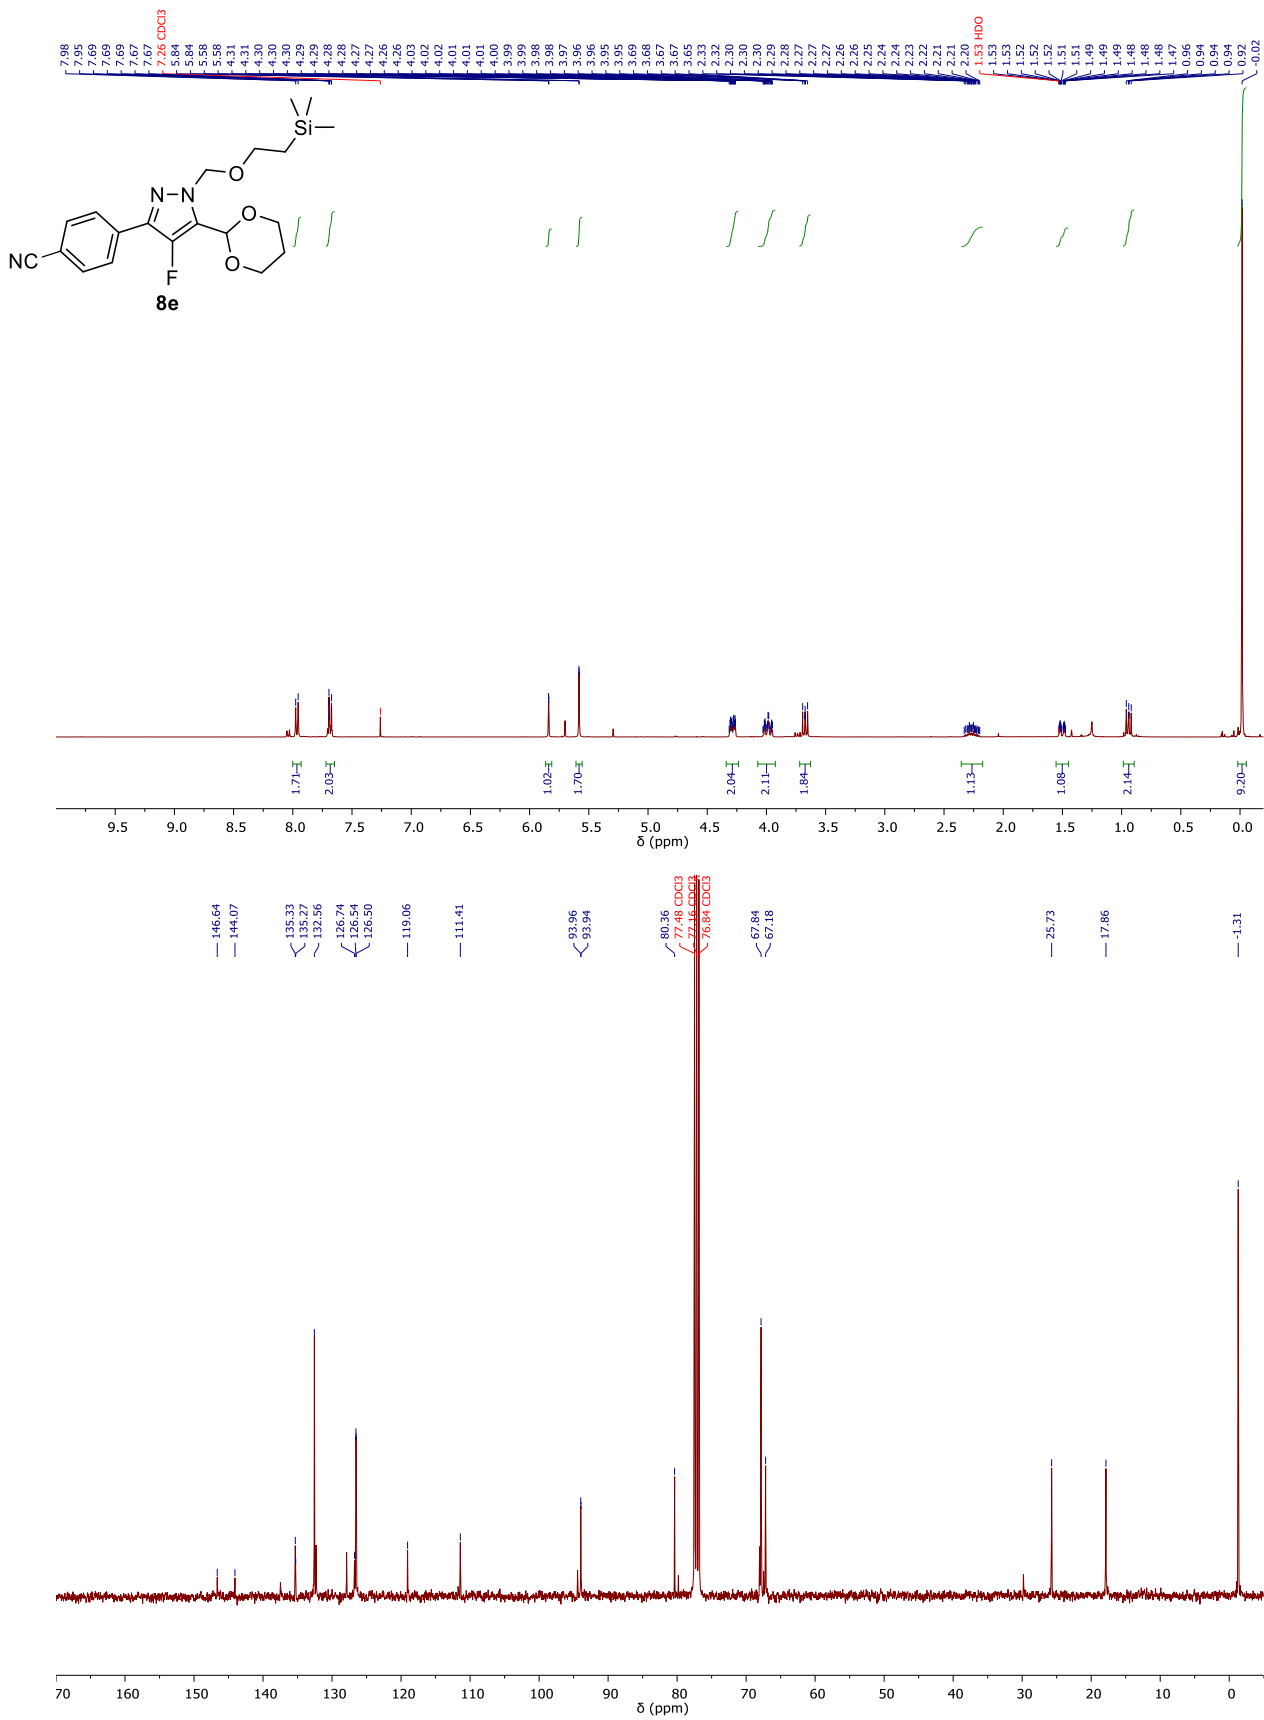

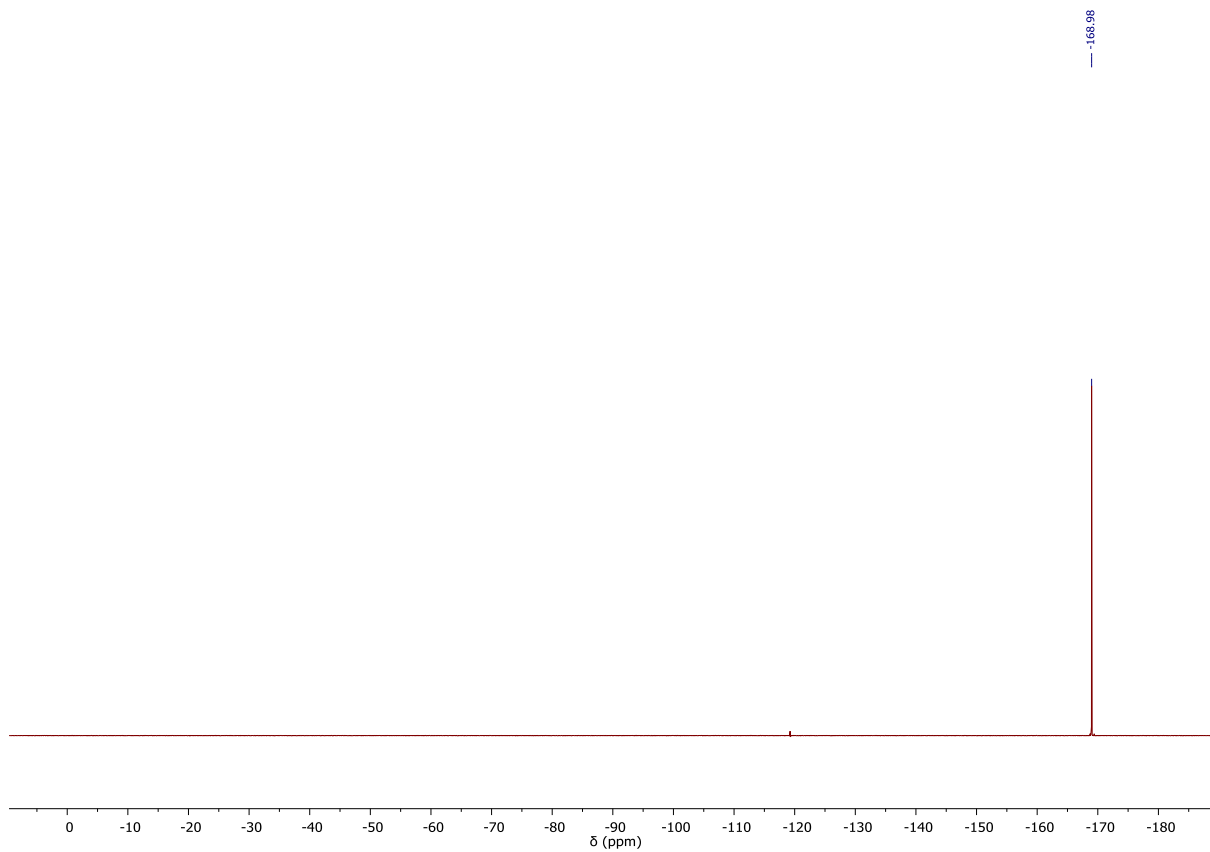





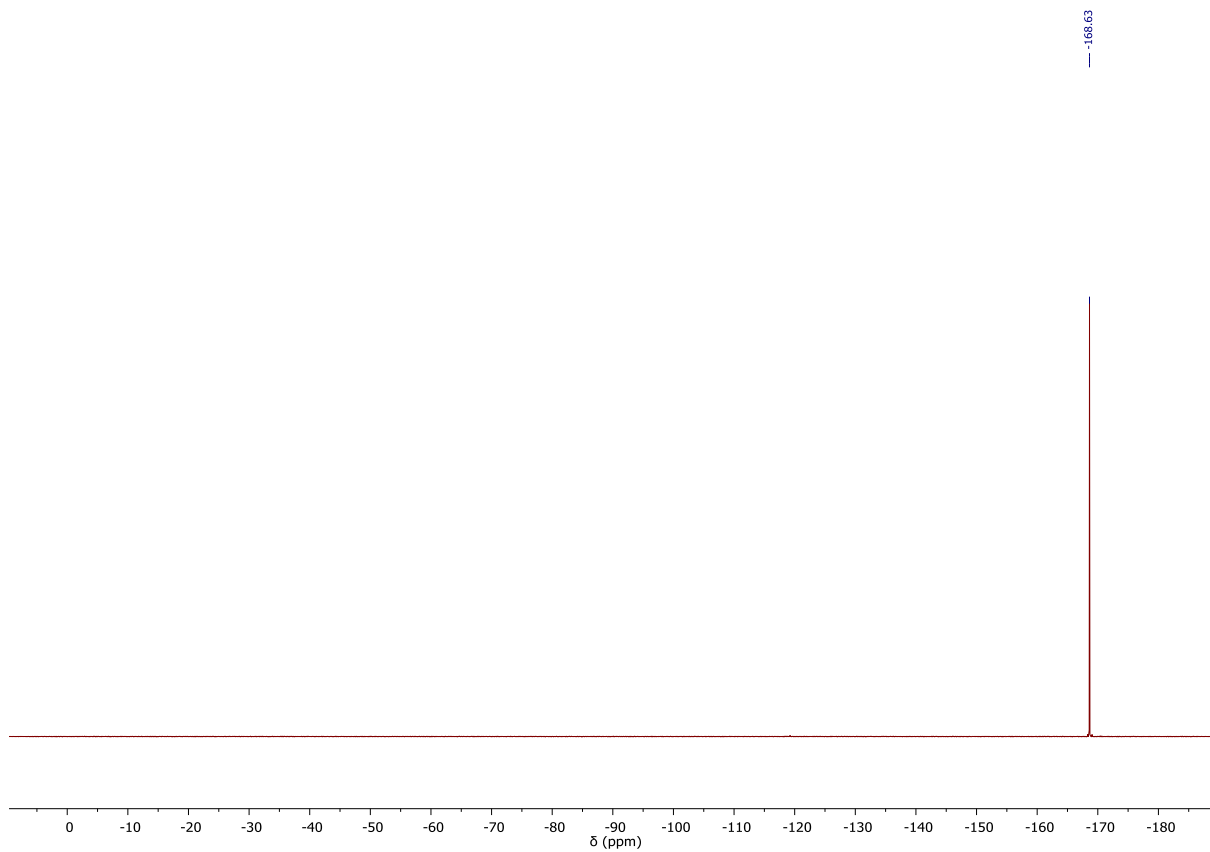

### 3. Selective deprotection of the SEM-group – NMR spectra

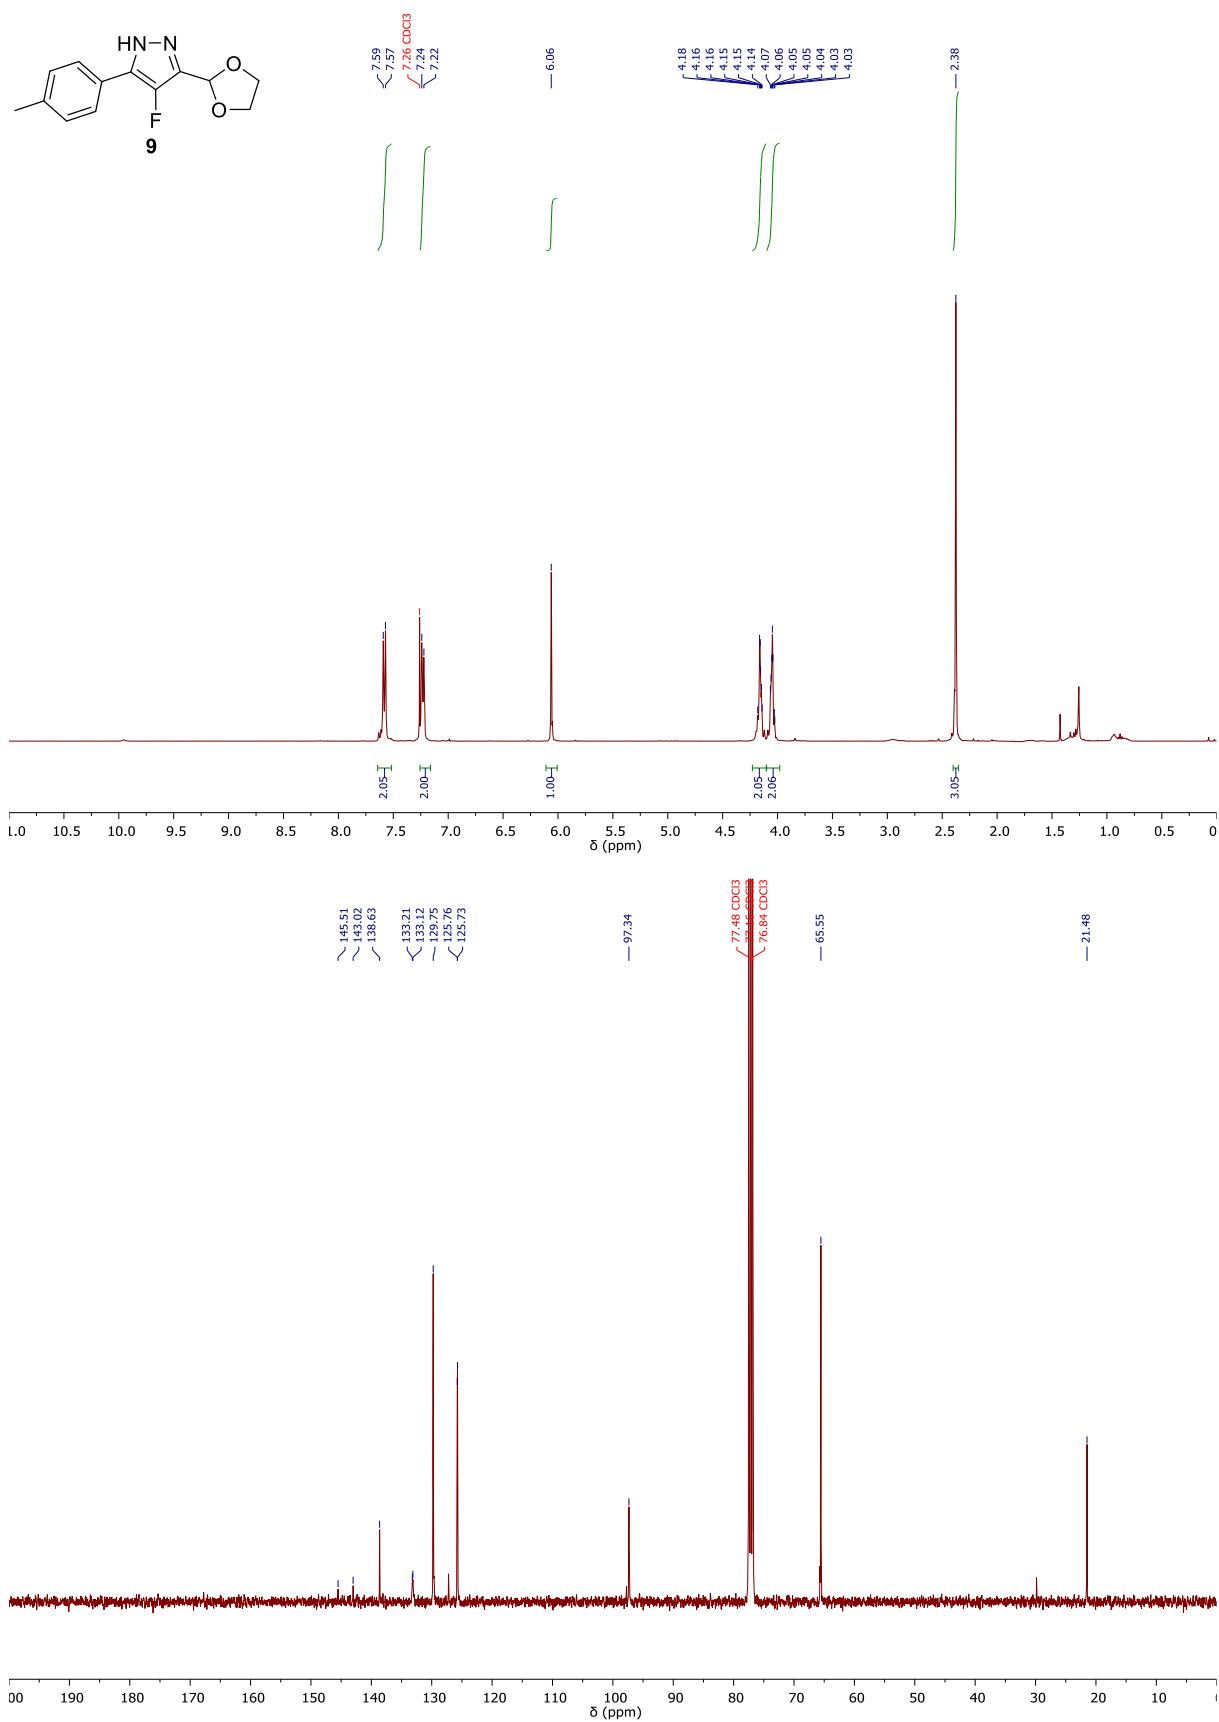

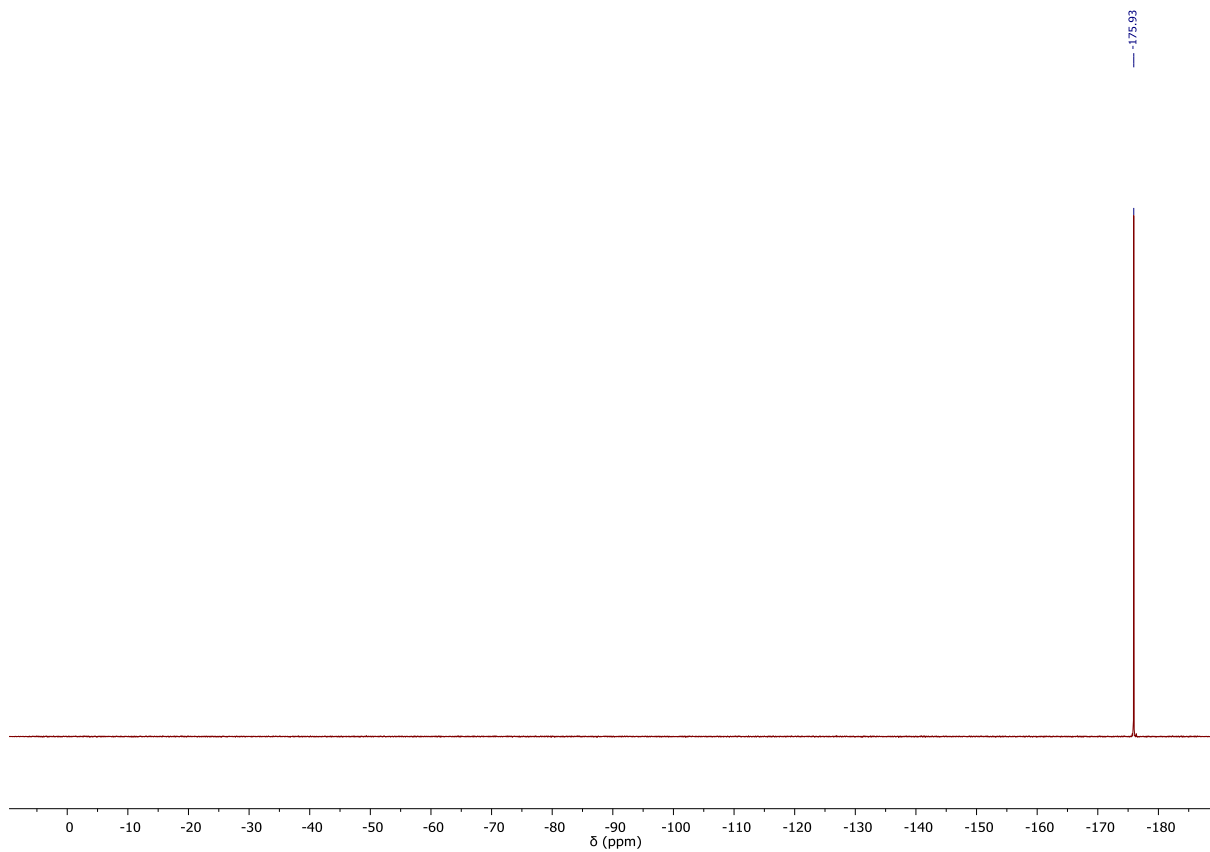

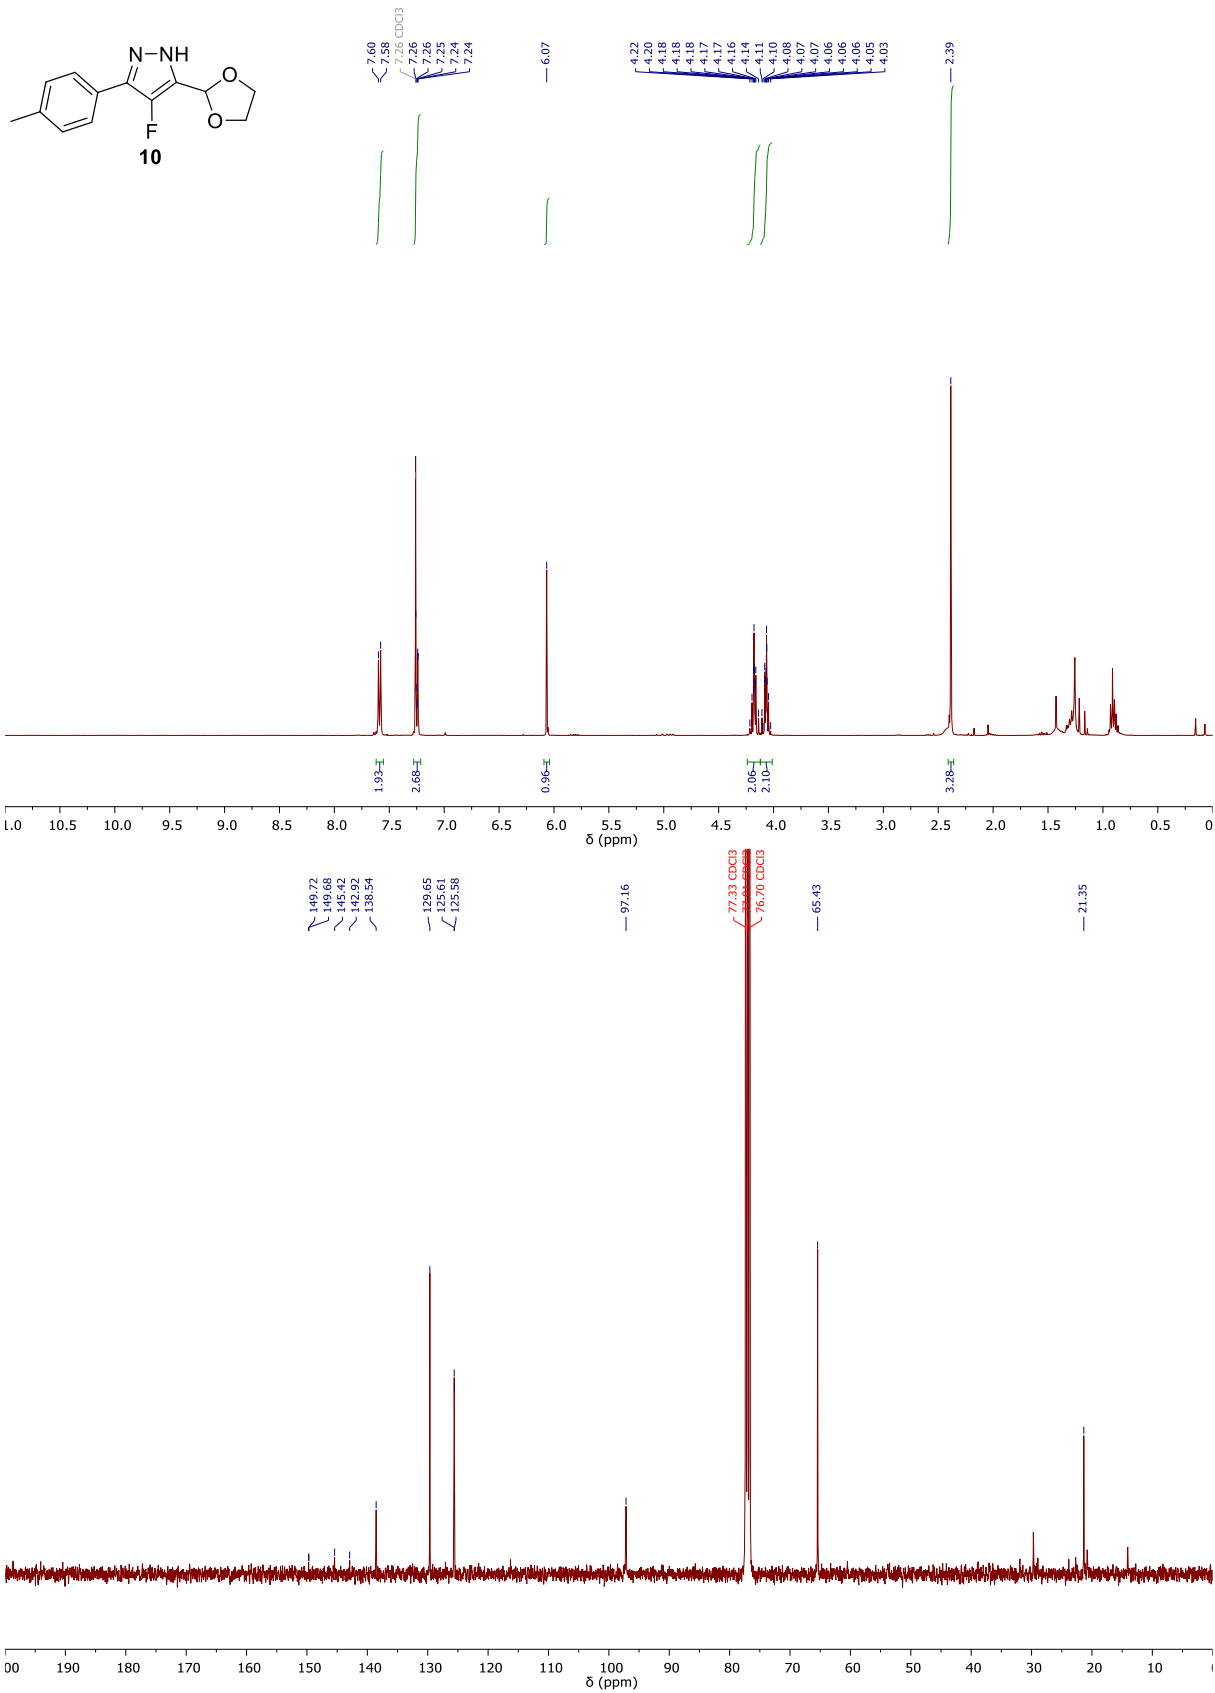

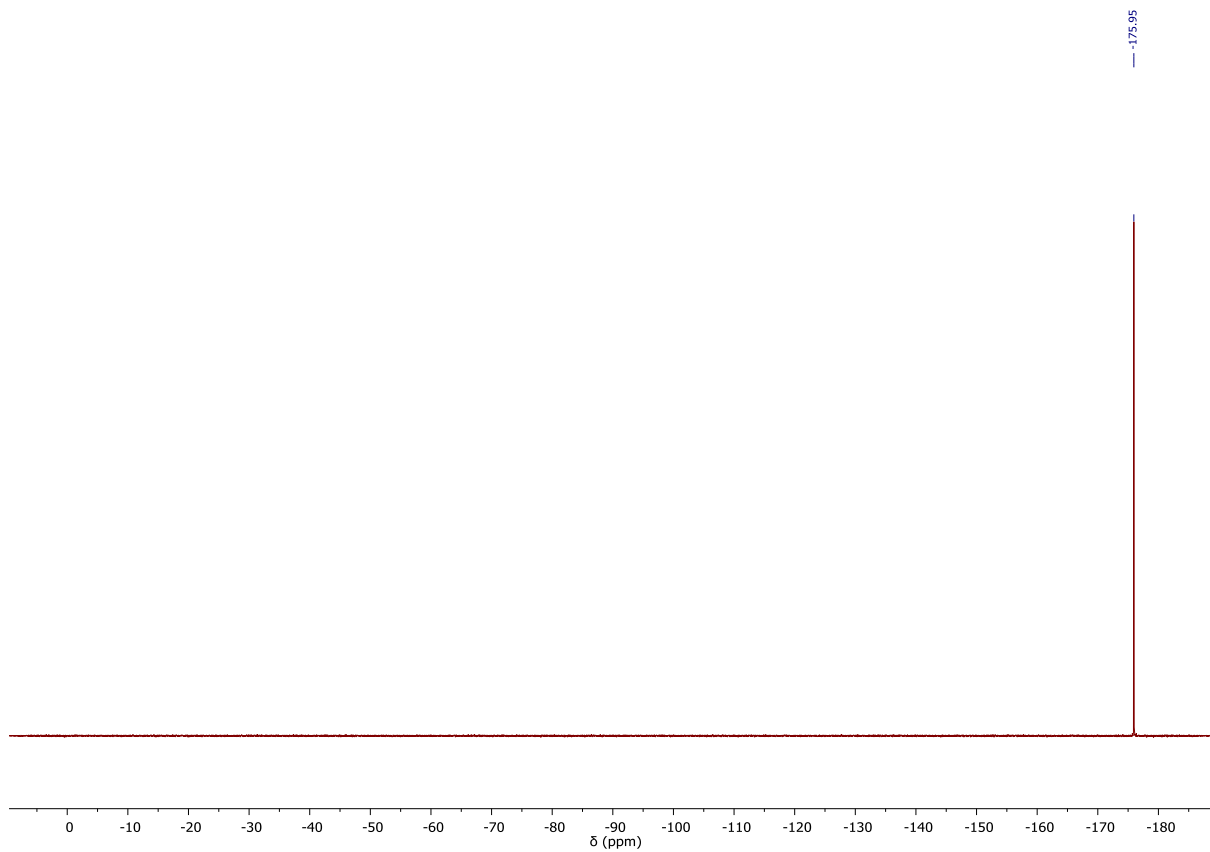

#### 4. Formal synthesis of neprilysin inhibitor key intermediate – NMR spectra

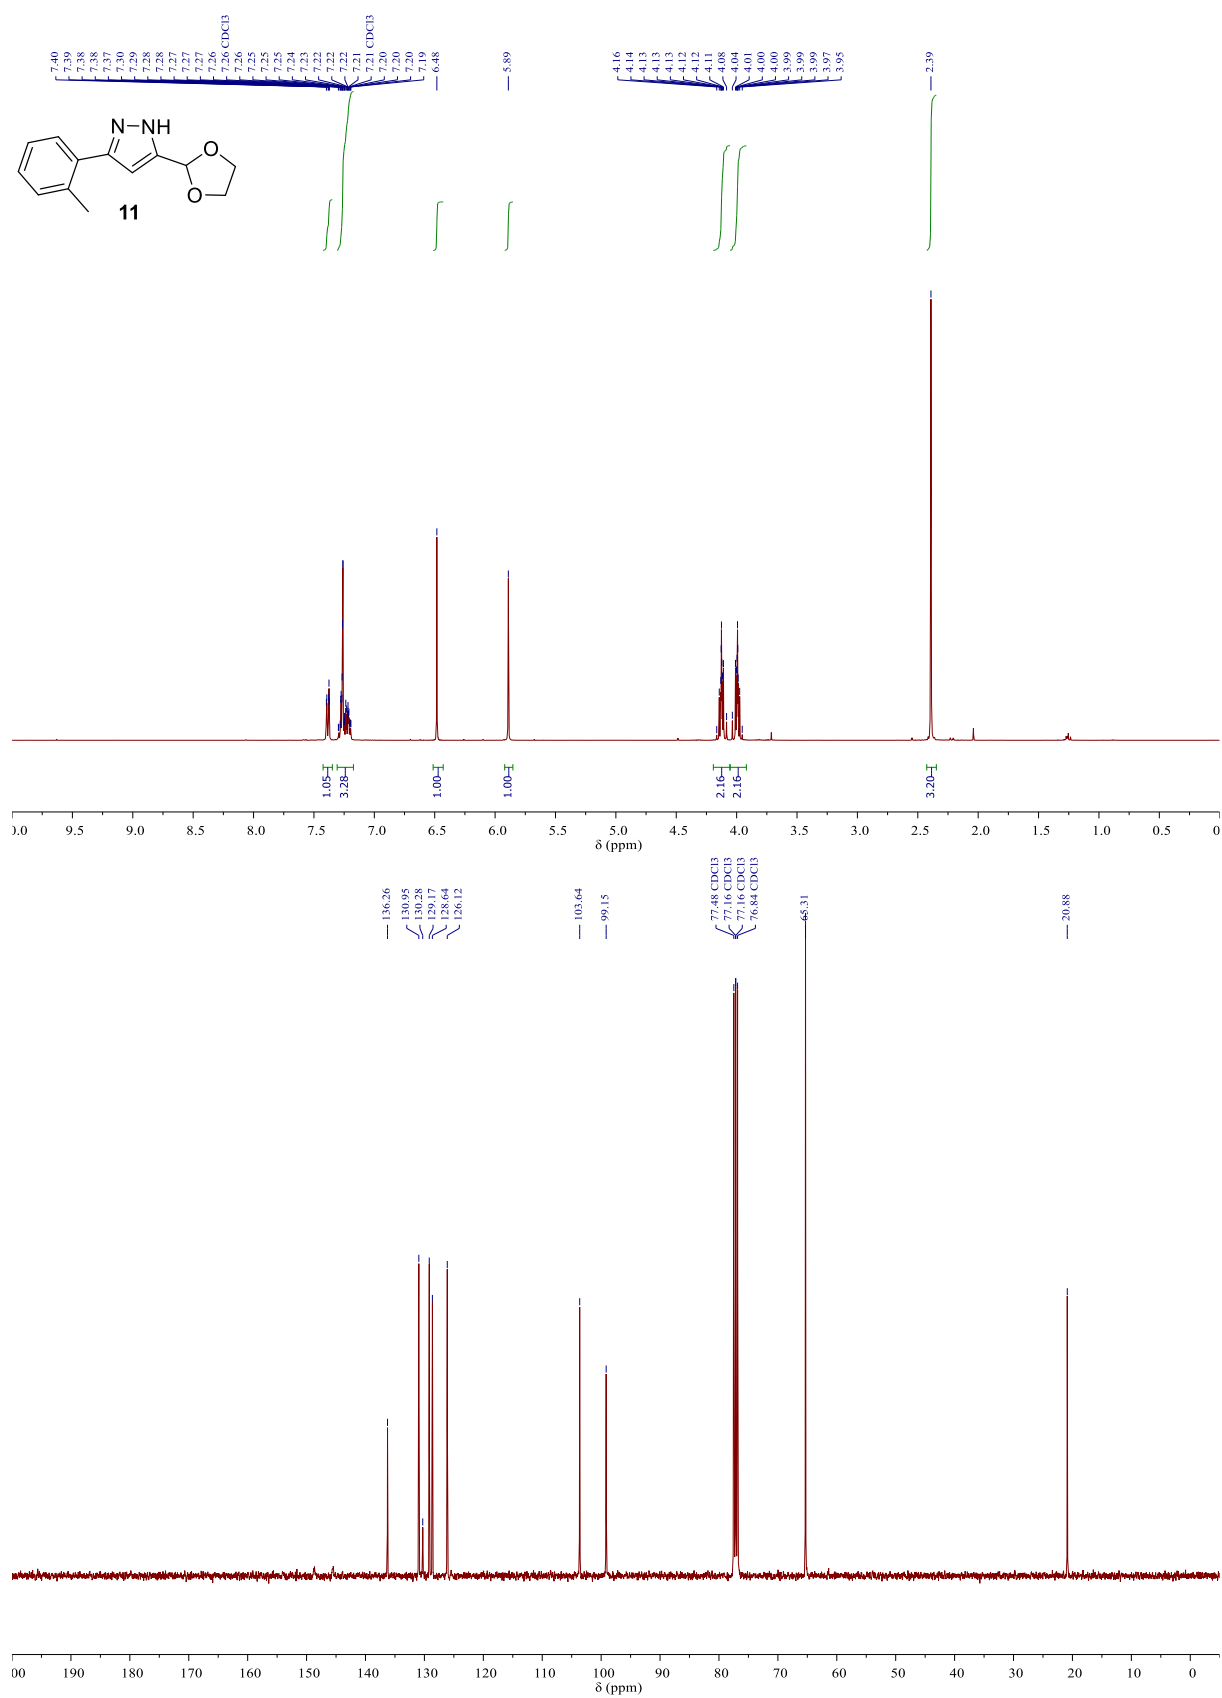

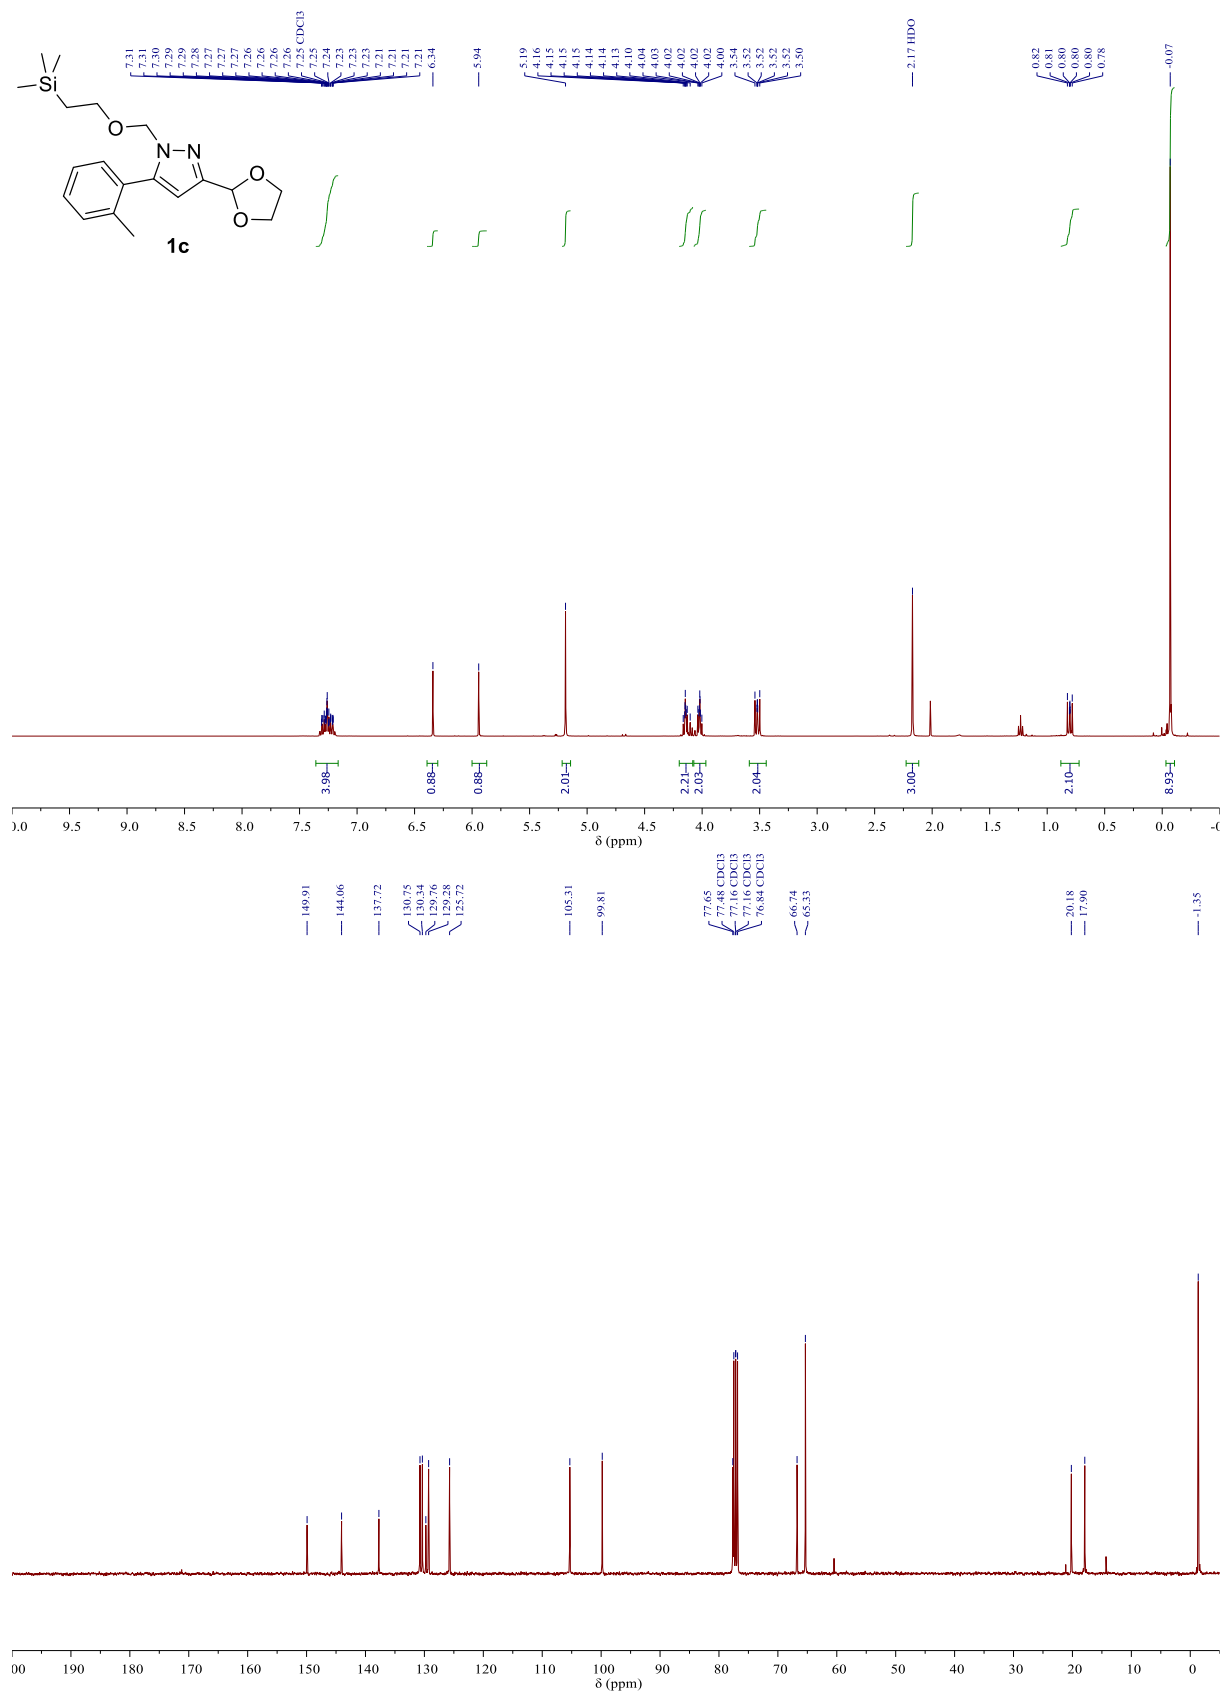



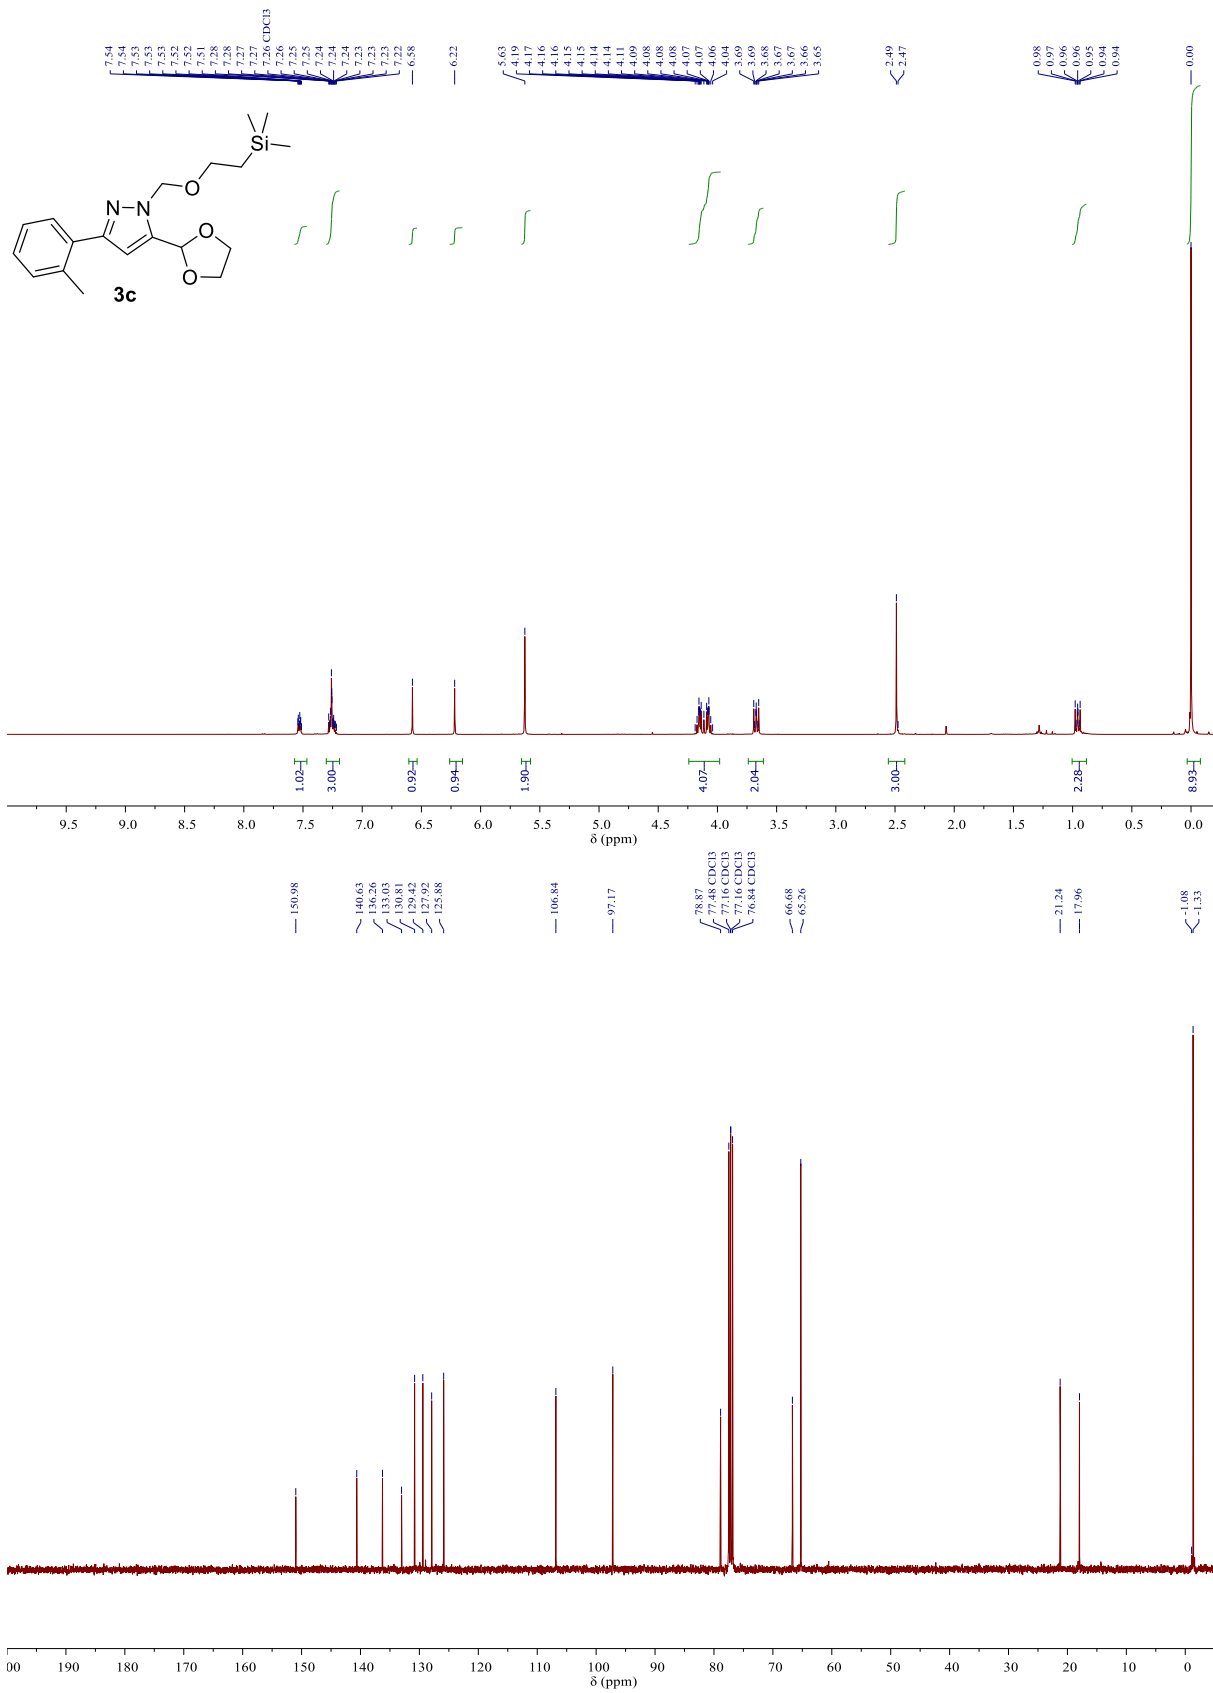

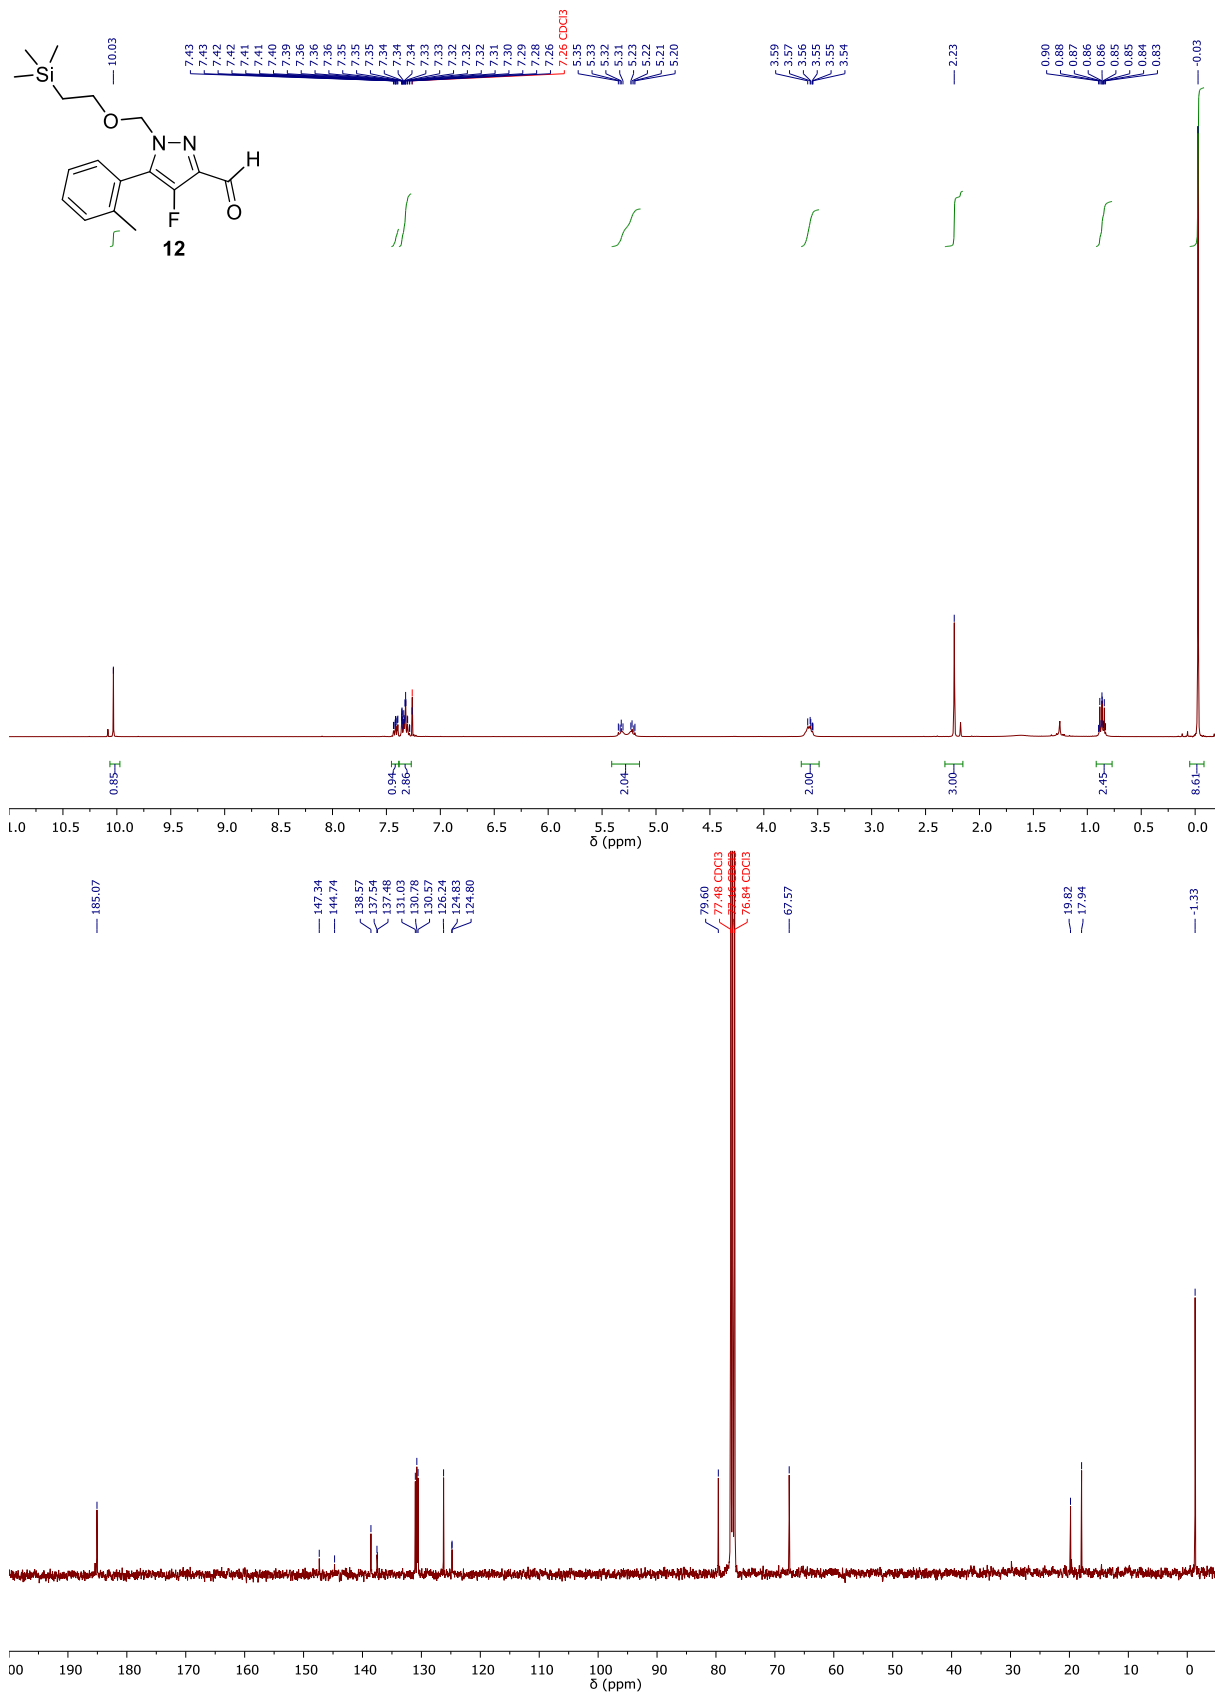

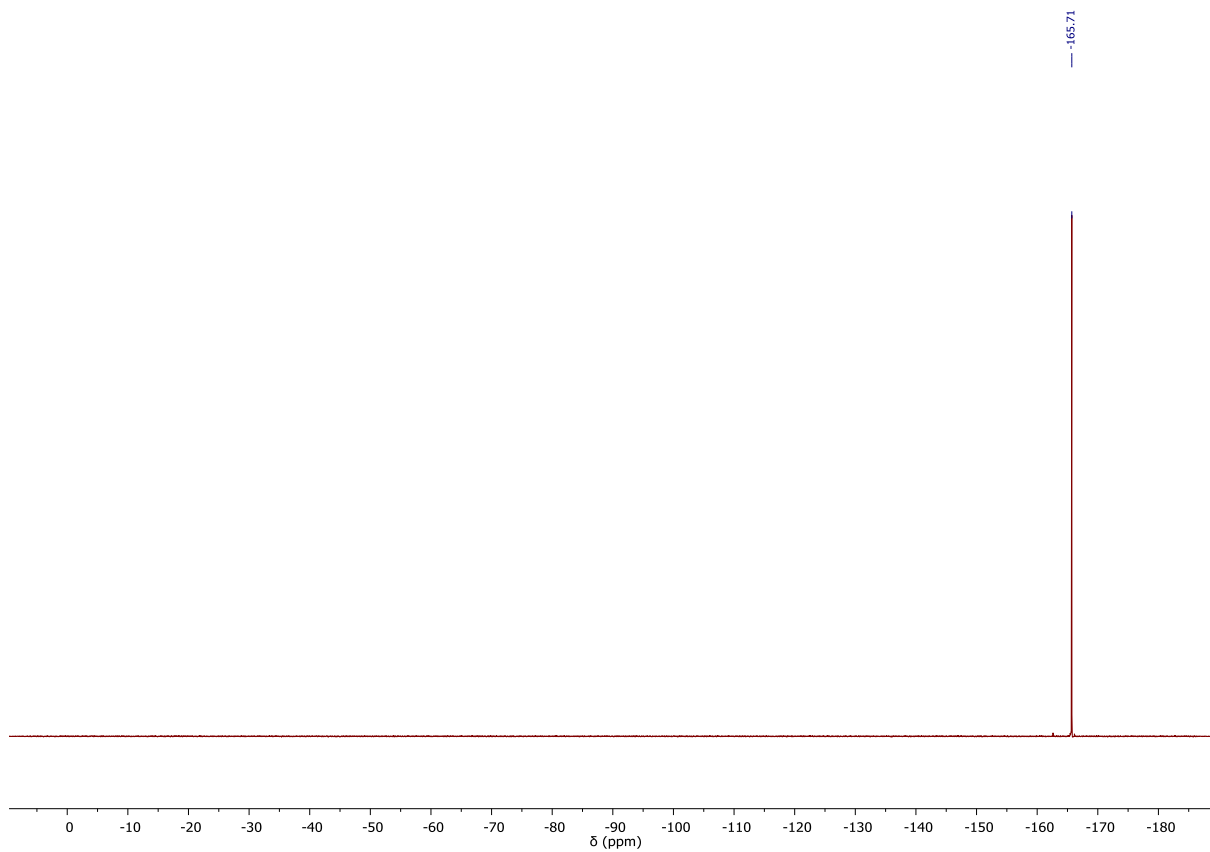

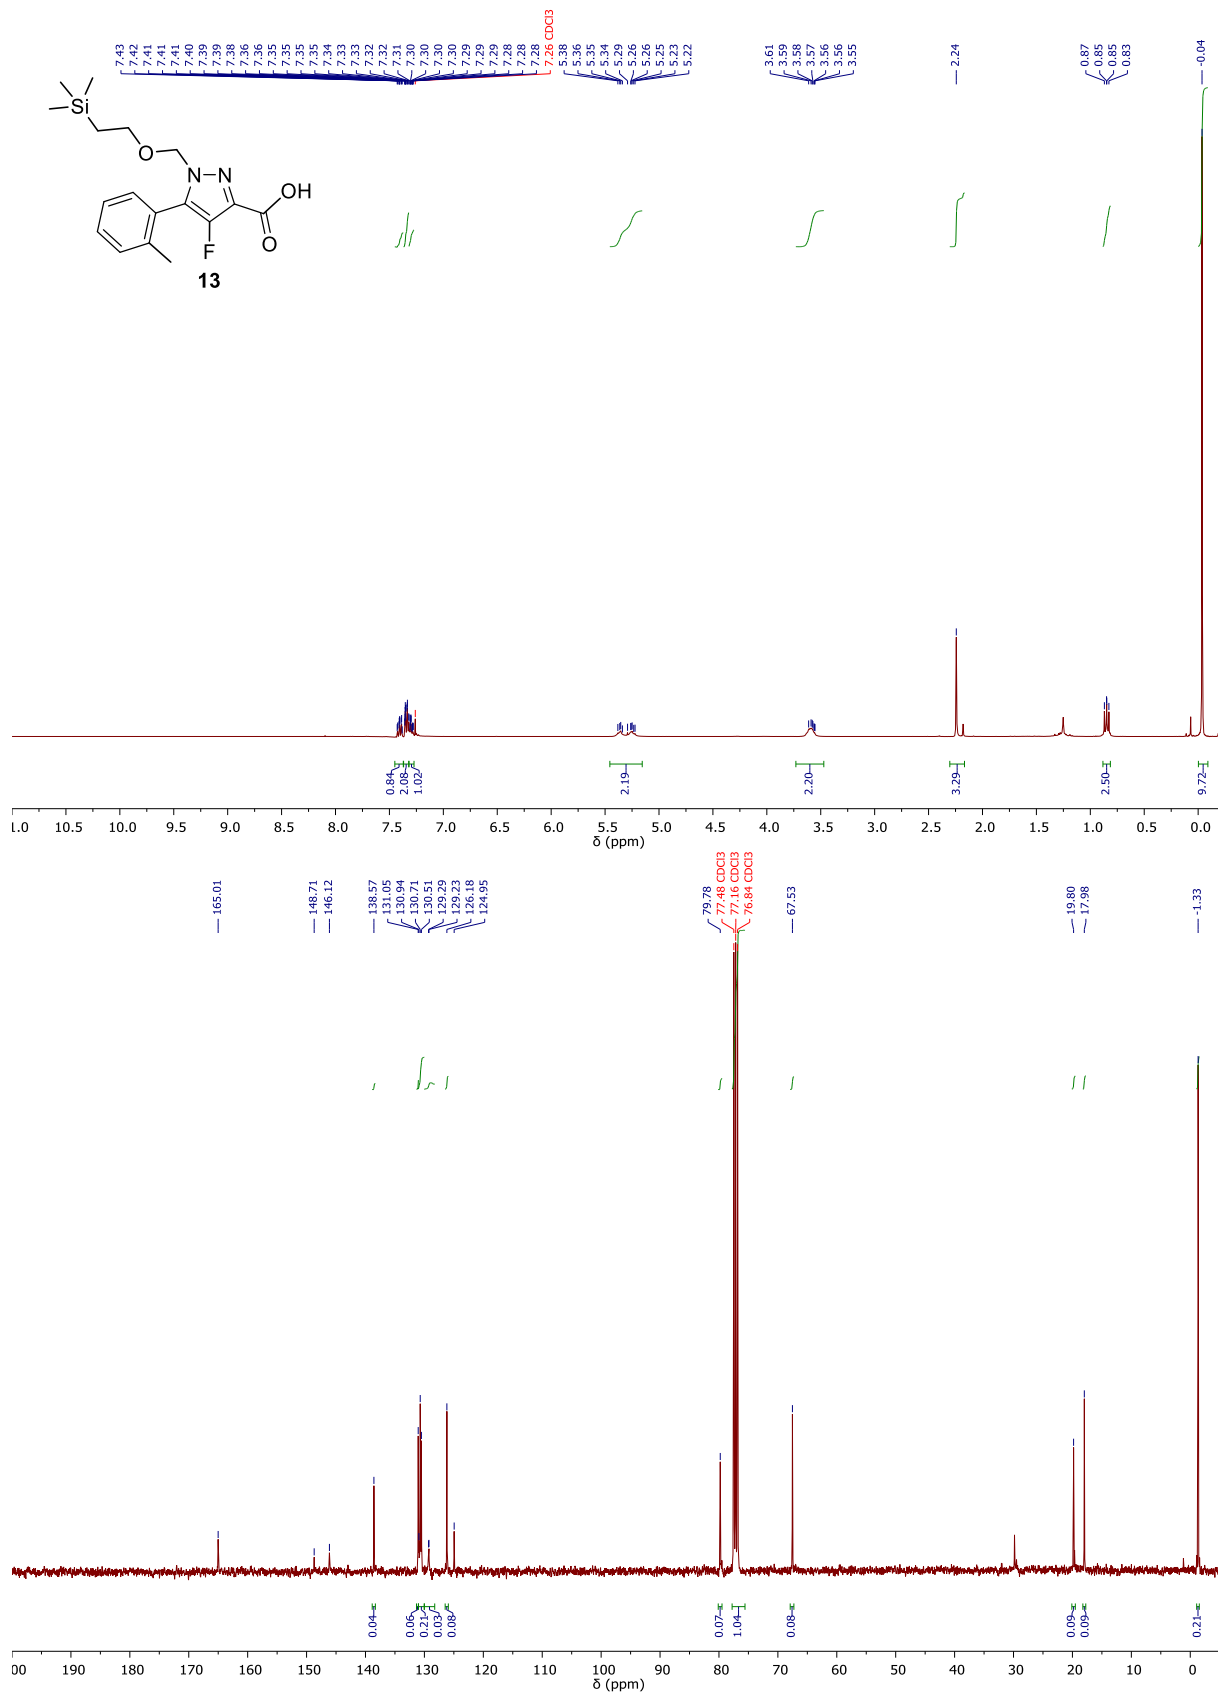

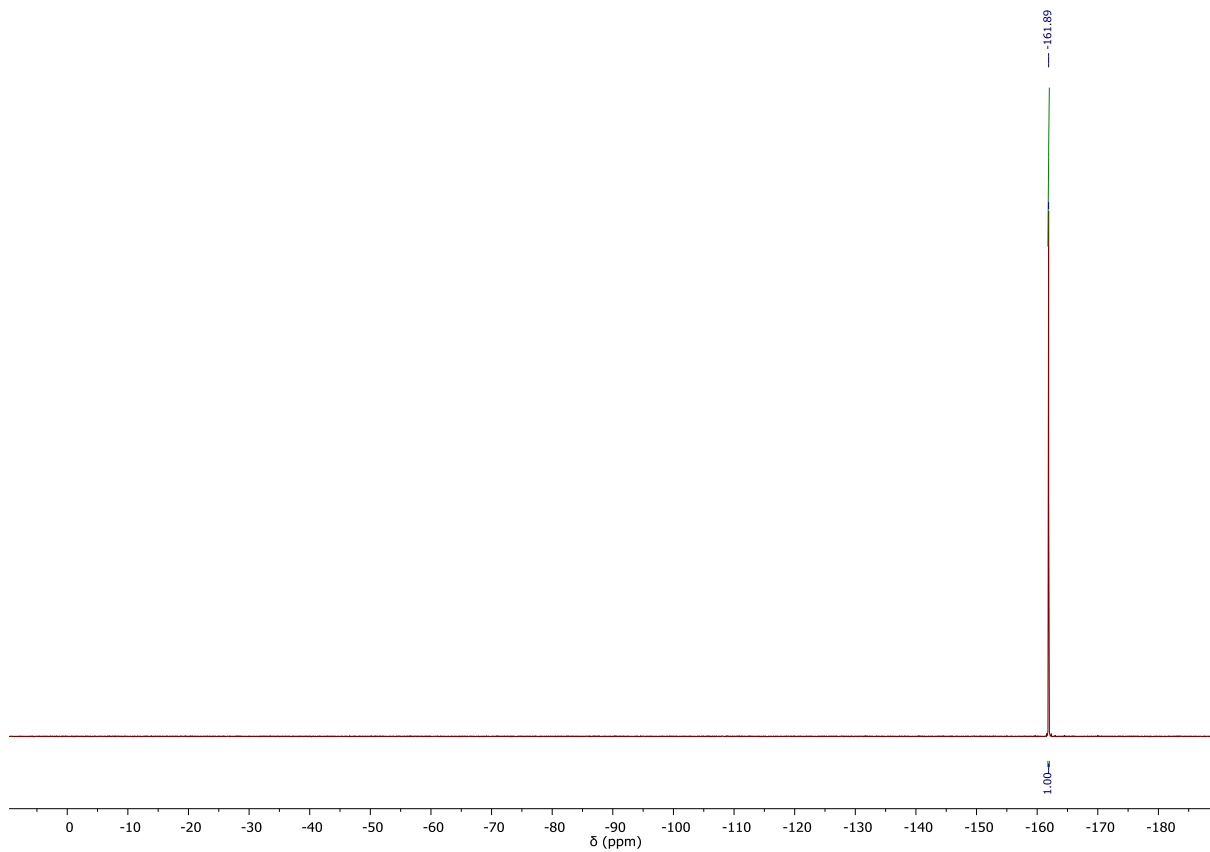

Supplement: d0nj05222a1.pdf [file d0nj05222a1.pdf]
